# Supplementary material for: RNA Sequencing of Lake Charr Epidermal Mucus to Assess Molecular Effects of Diluted Bitumen Exposure in a Boreal Lake
Source: Frontiers journal article supplement (doi:10.3389/fenvs.2022.836640), 2022-02-04
Supplement: Data_Sheet_2.xlsx [file Data_Sheet_2.xlsx]

## Sheet: updated_jan_2021
sample_location	year	month	day	exposure_day	units	tot_2ring	tot_3ring	tot_4ring	tot_4+ring	tot_pac
Rings						2	3	4	>4				***Manuscript containing compound specific concentrations is forthcoming***
Lake Surface Water	2019	June	18	-3	ng/L	0.0337097	0.0104472	0.0112728	0.00247631	0.0579061
Lake Surface Water	2019	June	22	1	ng/L	0.0381693	0.0148901	0.00576247	0.00434415	0.0631661
Lake Surface Water	2019	June	23	2	ng/L	0.0126897	0.00188512	0.00141433	0.00294411	0.0189332
Lake Surface Water	2019	June	24	3	ng/L	0.021625	0.00282871	0.00178467	0.00126401	0.0275024
Lake Surface Water	2019	June	25	4	ng/L	0.0211095	0.0122425	0.00138891	0.00092279	0.0356638
Lake Surface Water	2019	June	26	5	ng/L	0.208364	1.26465	0.798799	0.0229503	2.29477
Lake Surface Water	2019	June	27	6	ng/L	0.146381	0.537236	0.351593	0.0124672	1.04768
Lake Surface Water	2019	July	11	20	ng/L	0.0515574	0.316226	0.398841	0.01493	0.781554
Lake Surface Water	2019	August	26	66	ng/L	0.0408539	0.0331261	0.00562569	0.00205475	0.0816604
Lake Surface Water	2019	September	16	87	ng/L	0.0253541	0.031023	0.00510838	0.00444707	0.0659325

## Sheet: Definitions
abbreviation	full_name
NA	no sample
benz_anth	Benz[a]anthracene
benzo_pyr	Benzo[a]pyrene
benzo_b	Benzo[b]fluoranthene
benzo_k	Benzo[k]fluoranthene
benzo_pery	Benzo[g,h,i]perylene
dibenzo_anth	Dibenzo[a,h]anthracene
indeno	Indeno[1,2,3-c,d]pyrene
1_meth_naph	1-Methylnaphthalene
2_meth_naph	2-Methylnaphthalene
c2_naph	C2 Naphthalene
c3_naph	C3 Naphthalene (Trimethyl)
c4_naph	C4 Naphthalene (Tetramethyl)
1_meth_phen	1-Methylphenanthrene
2_meth_phen	2-Methylphenanthrene
1_7_dimeth	1,7-Dimethylphenanthrene
1_8_dimeth	1,8-Dimethylphenanthrene
2_6_dimeth	2,6-Dimethylphenanthrene
3_6_dimeth	3,6-Dimethylphenanthrene
c2_phen	C2 Phenanthrene
3_meth_phen	3-Methylphenanthrene
9_4_meth_phen	9/4-Methylphenanthrene
c3_phen	C3 Phenanthrene
c4_phen	C4 Phenanthrene
dibenzoth	Dibenzothiophene
c1_dibenzoth	C1 Dibenzothiophene
c2_dibenzoth	C2 Dibenzothiophene
c3_dibenzoth	C3 Dibenzothiophene
c1_fluor	C1 Fluorene
c2_fluor	C2 Fluorene
retene	Retene
c1_chrys	C1 Chrysene
c3_chrys	C3 Chrysene
c1_pyrene	C1 Pyrene
c2_pyrene	C2 Pyrene
c1_benz_a_pyr	C1 Benzo[a]pyrene
