# Supplementary material for: RNA Sequencing of Lake Charr Epidermal Mucus to Assess Molecular Effects of Diluted Bitumen Exposure in a Boreal Lake
Source: Frontiers journal article supplement (doi:10.3389/fenvs.2022.836640), 2022-02-04
Supplement: Data_Sheet_3.xlsx [file Data_Sheet_3.xlsx]

## Sheet: 2017vs2018 Gene Expression Data
Differentially expressed transcripts among 2017 and 2018 baseline data from Lake 260 lake trout (2018 was used as the base, e.g. positive fold-change = upregulated in 2017).
Transcriptome Sequence ID	log2FoldChange	pvalue	padj	Gene Name	Uniprot ID	Gene Symbol
QSF_LOC101165464.12.13	13.7181	1.44e-50	2.39e-46	RRT15_YEAST Regulator of rDNA transcription protein 15	RRT15_YEAST	RRT15
QSF_RNA28S5.1.1	9.56466	8.31e-31	6.91e-27	TES_MOUSE Testin	TES_MOUSE	Tes
QSF_contig_057106	16.1374	2.64e-30	1.46e-26	YCX91_PHAAO Uncharacterized protein ORF91	YCX91_PHAAO	#N/A
QSF_RNA45S5.6.6	10.343	6.32e-27	2.63e-23	STAC3_DANRE SH3 and cysteine-rich domain-containing protein 3	STAC3_DANRE	stac3
QSF_LOC100809185.1.1	11.1008	2.12e-24	7.06e-21	ART2_YEAST Putative uncharacterized protein ART2	ART2_YEAST	ART2
QSF_contig_023664	-11.468	1.14e-23	3.16e-20	CIO1B_SALSA Probable cytosolic iron-sulfur protein assembly protein ciao1-B {ECO:0000255|HAMAP-Rule:MF_03037}	CIO1B_SALSA	ciao1b
QSF_contig_049141	7.10072	7.73e-22	1.84e-18	SECE_METMP Protein translocase subunit SecE {ECO:0000255|HAMAP-Rule:MF_00422}	SECE_METMP	secE
QSF_contig_002480	13.7788	6.25e-21	1.3e-17	PNP_DESRM Polyribonucleotide nucleotidyltransferase {ECO:0000255|HAMAP-Rule:MF_01595}	PNP_DESRM	pnp
QSF_RN45S.4.9	-4.38014	1.09e-20	2.02e-17	TAR1_YEAST Protein TAR1	TAR1_YEAST	TAR1
QSF_S10I.11.12	-9.14077	1.48e-20	2.46e-17	S10I_ICTPU Ictacalcin	S10I_ICTPU	#N/A
QSF_LOC100501556.2.2	14.1643	3.41e-20	5.16e-17	NLRC3_MOUSE Protein NLRC3	NLRC3_MOUSE	Nlrc3
QSF_LOC100843429.3.3	13.7612	3.78e-20	5.24e-17	BIOB_MAGMM Biotin synthase {ECO:0000255|HAMAP-Rule:MF_01694}	BIOB_MAGMM	bioB
QSF_contig_005719	12.4403	3.41e-19	4.05e-16	YCX91_PHAAO Uncharacterized protein ORF91	YCX91_PHAAO	#N/A
QSF_MYCGRDRAFT_30987.1.1	13.398	3.41e-19	4.05e-16	TAR1_YEAST Protein TAR1	TAR1_YEAST	TAR1
QSF_LOC101173919.1.1	-14.1635	2.36e-18	2.62e-15	L_RABVB Large structural protein	L_RABVB	L
QSF_contig_068483	11.7634	2.7e-17	2.81e-14	PKSG_BACSU Polyketide biosynthesis 3-hydroxy-3-methylglutaryl-ACP synthase PksG	PKSG_BACSU	pksG
QSF_contig_057302	12.7492	1.67e-16	1.63e-13	NU2M_LAMFL NADH-ubiquinone oxidoreductase chain 2	NU2M_LAMFL	MT-ND2
QSF_LOC101165464.10.13	11.4817	2.9e-16	2.53e-13	TAR1_KLULA Protein TAR1	TAR1_KLULA	TAR1-A
QSF_LOC101483661.1.1	-2.74334	3.03e-16	2.53e-13	TNIK_MOUSE Traf2 and NCK-interacting protein kinase	TNIK_MOUSE	Tnik
QSF_contig_056967	12.7225	3.04e-16	2.53e-13	YCX91_PHAAO Uncharacterized protein ORF91	YCX91_PHAAO	#N/A
QSF_LOC100534569.5.12	-5.6948	1.79e-14	1.42e-11	RLA0_DANRE 60S acidic ribosomal protein P0	RLA0_DANRE	rplp0
QSF_RS2.26.26	-4.44588	3.3e-14	2.5e-11	RL12_MOUSE 60S ribosomal protein L12	RL12_MOUSE	Rpl12
QSF_contig_024330	-4.02551	5.92e-12	4.28e-09	#N/A	#N/A	#N/A
QSF_LOC100136044.8.9	-6.58473	1.34e-11	9.31e-09	RS20_RAT 40S ribosomal protein S20	RS20_RAT	Rps20
QSF_LOC101484790.1.1	5.32938	1.53e-11	1.02e-08	#N/A	#N/A	#N/A
QSF_ANG1.1.1	-3.27037	2.52e-11	1.61e-08	RNSL3_DANRE Ribonuclease-like 3 {ECO:0000303|PubMed:16861230}	RNSL3_DANRE	rnasel3
QSF_LOC100706233.1.1	-8.03725	2.81e-11	1.73e-08	DBNLA_XENLA Drebrin-like protein A	DBNLA_XENLA	dbnl-a
QSF_TNIK.1.8	-3.21838	5.73e-11	3.32e-08	TNIK_MOUSE Traf2 and NCK-interacting protein kinase	TNIK_MOUSE	Tnik
QSF_LAMP1.24.35	4.51832	5.97e-11	3.32e-08	PPR12_ARATH Pentatricopeptide repeat-containing protein At1g05670, mitochondrial	PPR12_ARATH	At1g05670
QSF_contig_060505	-3.34804	5.98e-11	3.32e-08	FA63A_BOVIN Protein FAM63A	FA63A_BOVIN	#N/A
QSF_LOC100534569.1.12	-4.31984	6.83e-11	3.67e-08	RLA0_RANSY 60S acidic ribosomal protein P0	RLA0_RANSY	#N/A
QSF_contig_059495	-5.01587	8.97e-11	4.67e-08	R1AB_BCHK4 Replicase polyprotein 1ab	R1AB_BCHK4	rep
QSF_contig_065757	-3.71225	1.14e-10	5.74e-08	NDB4G_UROYA Antimicrobial peptide UyCT1 {ECO:0000303|PubMed:23182832}	NDB4G_UROYA	#N/A
QSF_LOC100700425.1.2	-4.26578	1.66e-10	8.14e-08	RL5_CHICK 60S ribosomal protein L5	RL5_CHICK	RPL5
QSF_RS24.2.2	-5.11862	1.73e-10	8.21e-08	RS24_TAKRU 40S ribosomal protein S24	RS24_TAKRU	rps24
QSF_LOC101165464.13.13	-6.3212	1.92e-10	8.87e-08	NLRC3_MOUSE Protein NLRC3	NLRC3_MOUSE	Nlrc3
QSF_LOC100839370.1.1	6.18113	3.91e-10	1.76e-07	#N/A	#N/A	#N/A
QSF_contig_030288	7.68287	4.84e-10	2.12e-07	#N/A	#N/A	#N/A
QSF_NU2M.1.2	8.49917	5.49e-10	2.34e-07	NU2M_SALSA NADH-ubiquinone oxidoreductase chain 2	NU2M_SALSA	MT-ND2
QSF_LOC100698233.1.1	-7.61561	6.73e-10	2.8e-07	MMAA_MOUSE Methylmalonic aciduria type A homolog, mitochondrial	MMAA_MOUSE	Mmaa
QSF_RIR2.1.3	-3.16131	7.18e-10	2.91e-07	RIR2_DANRE Ribonucleoside-diphosphate reductase subunit M2	RIR2_DANRE	rrm2
QSF_contig_018285	5.73063	8.25e-10	3.27e-07	#N/A	#N/A	#N/A
QSF_contig_046550	8.06439	1.32e-09	5.09e-07	NOP14_MOUSE Nucleolar protein 14	NOP14_MOUSE	Nop14
QSF_VRK3.838.924	5.10247	1.62e-09	6.14e-07	SODF_ENTHI Superoxide dismutase [Fe]	SODF_ENTHI	SODB
QSF_ATG5.48.83	3.85956	1.87e-09	6.91e-07	SH3L3_HUMAN SH3 domain-binding glutamic acid-rich-like protein 3	SH3L3_HUMAN	SH3BGRL3
QSF_contig_053373	7.98255	3.58e-09	1.3e-06	MURC_BACCZ UDP-N-acetylmuramate--L-alanine ligase {ECO:0000255|HAMAP-Rule:MF_00046}	MURC_BACCZ	murC
QSF_CEBPD.2.3	-7.5518	7.88e-09	2.74e-06	CEBPD_RAT CCAAT/enhancer-binding protein delta	CEBPD_RAT	Cebpd
QSF_MIA3.3.7	-5.96012	7.92e-09	2.74e-06	MIA3_HUMAN Melanoma inhibitory activity protein 3	MIA3_HUMAN	#N/A
QSF_contig_018369	5.61316	9.4e-09	3.19e-06	#N/A	#N/A	#N/A
QSF_TIFA.16.87	3.97093	1.19e-08	3.95e-06	#N/A	#N/A	#N/A
QSF_ZBT17.2.11	7.54504	1.35e-08	4.42e-06	TTN1_CAEEL Titin homolog {ECO:0000303|PubMed:12381307}	TTN1_CAEEL	ttn-1
QSF_contig_011581	8.41887	1.41e-08	4.5e-06	#N/A	#N/A	#N/A
QSF_contig_017621	2.32119	1.77e-08	5.56e-06	SEC16_PICST COPII coat assembly protein SEC16	SEC16_PICST	SEC16
QSF_contig_034177	5.35509	1.86e-08	5.74e-06	#N/A	#N/A	#N/A
QSF_LOC100194633.2.6	-6.4482	1.9e-08	5.75e-06	CIRBP_XENTR Cold-inducible RNA-binding protein {ECO:0000312|EMBL:CAJ83306.1}	CIRBP_XENTR	cirbp
QSF_XIP.3.4	5.10896	2.13e-08	6.34e-06	TNR1A_BOVIN Tumor necrosis factor receptor superfamily member 1A	TNR1A_BOVIN	TNFRSF1A
QSF_contig_060252	7.47466	2.65e-08	7.75e-06	PSD_CLOBJ Phosphatidylserine decarboxylase proenzyme {ECO:0000255|HAMAP-Rule:MF_00663}	PSD_CLOBJ	psd
QSF_VRK3.733.924	4.37566	2.85e-08	8.17e-06	TXTP_BOVIN Tricarboxylate transport protein, mitochondrial	TXTP_BOVIN	SLC25A1
QSF_contig_003877	8.74438	3.45e-08	9.72e-06	YCX91_PHAAO Uncharacterized protein ORF91	YCX91_PHAAO	#N/A
QSF_LOC101466427.1.1	-6.55514	4e-08	1.11e-05	RS27_XENLA 40S ribosomal protein S27	RS27_XENLA	rps27
QSF_LOC100180429.1.1	4.45466	4.25e-08	1.16e-05	YMO3_PANSE Uncharacterized protein in mobD 3'region	YMO3_PANSE	#N/A
QSF_LOC101167901.1.1	-5.45468	4.36e-08	1.17e-05	IF4A2_CHICK Eukaryotic initiation factor 4A-II	IF4A2_CHICK	EIF4A2
QSF_contig_018868	5.14548	4.55e-08	1.2e-05	#N/A	#N/A	#N/A
QSF_contig_003552	7.95651	4.8e-08	1.25e-05	#N/A	#N/A	#N/A
QSF_IFIT5.18.19	-2.92208	5.37e-08	1.38e-05	HDHD2_HUMAN Haloacid dehalogenase-like hydrolase domain-containing protein 2	HDHD2_HUMAN	HDHD2
QSF_contig_036848	6.6399	5.73e-08	1.45e-05	#N/A	#N/A	#N/A
QSF_LMO7.5.8	-7.4687	6.27e-08	1.56e-05	LMO7_HUMAN LIM domain only protein 7	LMO7_HUMAN	LMO7
QSF_LOC101470101.19.58	3.05155	6.82e-08	1.67e-05	NADA_GEOTN Quinolinate synthase A {ECO:0000255|HAMAP-Rule:MF_00569}	NADA_GEOTN	nadA
QSF_RTBS.35.42	3.19327	9.25e-08	2.23e-05	RTJK_DROFU RNA-directed DNA polymerase from mobile element jockey	RTJK_DROFU	jockey\pol
QSF_LIPS.12.170	2.53676	9.97e-08	2.37e-05	#N/A	#N/A	#N/A
QSF_LOC100711541.1.1	-3.55062	1.18e-07	2.76e-05	COPE_BOVIN Coatomer subunit epsilon	COPE_BOVIN	COPE
QSF_contig_036542	7.01379	1.31e-07	3e-05	IF2_CLOPH Translation initiation factor IF-2 {ECO:0000255|HAMAP-Rule:MF_00100}	IF2_CLOPH	#N/A
QSF_contig_029387	-3.23157	1.32e-07	3e-05	GLMM_VIBVU Phosphoglucosamine mutase {ECO:0000255|HAMAP-Rule:MF_01554}	GLMM_VIBVU	glmM
QSF_NO75.4.4	4.53179	1.41e-07	3.18e-05	ADNP2_HUMAN ADNP homeobox protein 2	ADNP2_HUMAN	ADNP2
QSF_E3.3.8	-6.81467	1.49e-07	3.3e-05	ION3_CARAU Intermediate filament protein ON3	ION3_CARAU	#N/A
QSF_RL31.7.18	-7.32342	1.6e-07	3.43e-05	RL31_PAROL 60S ribosomal protein L31	RL31_PAROL	rpl31
QSF_LOC100194660.16.19	-7.69216	1.6e-07	3.43e-05	YB3_XENLA B box-binding protein	YB3_XENLA	#N/A
QSF_RS4.3.3	-4.22635	1.61e-07	3.43e-05	RS4_ICTPU 40S ribosomal protein S4	RS4_ICTPU	rps4
QSF_BRAFLDRAFT_93160.1.1	2.9977	1.79e-07	3.77e-05	NQRA_VIBAN Na(+)-translocating NADH-quinone reductase subunit A {ECO:0000255|HAMAP-Rule:MF_00425}	NQRA_VIBAN	nqrA
QSF_PRDM1.1.3	-3.69148	1.89e-07	3.93e-05	PRDM1_MOUSE PR domain zinc finger protein 1	PRDM1_MOUSE	Prdm1
QSF_TXN4A.1.2	-5.22839	2.01e-07	4.13e-05	TXN4A_MOUSE Thioredoxin-like protein 4A	TXN4A_MOUSE	Txnl4a
QSF_VIG-2.1.6	-8.31748	2.15e-07	4.36e-05	STB2_YEAST Protein STB2	STB2_YEAST	STB2
QSF_FINTRIM.83.110	3.58292	2.8e-07	5.62e-05	#N/A	#N/A	#N/A
QSF_PDLI2.27.36	3.95222	3.13e-07	6.14e-05	#N/A	#N/A	#N/A
QSF_RTJK.22.35	2.25334	3.13e-07	6.14e-05	RTBS_DROME Probable RNA-directed DNA polymerase from transposon BS	RTBS_DROME	RTase
QSF_contig_009431	-4.99978	3.41e-07	6.6e-05	RLMC_HAEIE 23S rRNA (uracil(747)-C(5))-methyltransferase RlmC {ECO:0000255|HAMAP-Rule:MF_01012}	RLMC_HAEIE	rlmC
QSF_RPL3L.7.7	-5.06916	3.51e-07	6.72e-05	RL3L_BOVIN 60S ribosomal protein L3-like	RL3L_BOVIN	RPL3L
QSF_PNRC2.5.5	2.64209	3.63e-07	6.87e-05	PNRC2_SALSA Proline-rich nuclear receptor coactivator 2	PNRC2_SALSA	pnrc2
QSF_PLEC.1.4	-5.45712	3.8e-07	7.1e-05	PLEC_MOUSE Plectin	PLEC_MOUSE	Plec
QSF_KCNQ1OT1.1.1	6.12332	3.84e-07	7.11e-05	LORF2_HUMAN LINE-1 retrotransposable element ORF2 protein	LORF2_HUMAN	#N/A
QSF_VRK3.825.924	2.77846	3.91e-07	7.14e-05	FUCT1_NEMVE GDP-fucose transporter 1	FUCT1_NEMVE	slc35c1
QSF_LOC101472418.1.1	6.06936	3.98e-07	7.2e-05	SLMAP_RAT Sarcolemmal membrane-associated protein	SLMAP_RAT	Slmap
QSF_HMGB2.1.11	-3.05444	4.16e-07	7.44e-05	HMGB2_CHICK High mobility group protein B2	HMGB2_CHICK	HMGB2
QSF_TYPH.9.10	6.72749	4.55e-07	8.05e-05	TYPH_HUMAN Thymidine phosphorylase	TYPH_HUMAN	TYMP
QSF_contig_041783	5.91341	4.91e-07	8.55e-05	#N/A	#N/A	#N/A
QSF_NAL12.4.16	3.57513	4.93e-07	8.55e-05	RINI_PIG Ribonuclease inhibitor	RINI_PIG	RNH1
QSF_LOC101078882.3.8	-7.26918	5.06e-07	8.69e-05	RLA1_CHICK 60S acidic ribosomal protein P1	RLA1_CHICK	RPLP1
QSF_CXB5.8.14	4.24419	6.34e-07	0.000107573	FDHD_WOLSU Sulfurtransferase FdhD {ECO:0000255|HAMAP-Rule:MF_00187}	FDHD_WOLSU	fdhD
QSF_contig_030266	2.75576	7.02e-07	0.00011801	RTJK_DROME RNA-directed DNA polymerase from mobile element jockey	RTJK_DROME	pol
QSF_RN45S.8.9	4.22204	7.36e-07	0.000122429	TAR1_YEAST Protein TAR1	TAR1_YEAST	TAR1
QSF_CLCC1.9.218	5.9766	7.64e-07	0.000125927	TPO2_YEAST Polyamine transporter 2	TPO2_YEAST	TPO2
QSF_LOC100706095.1.1	3.95244	7.89e-07	0.000128696	GRM3_MOUSE Metabotropic glutamate receptor 3	GRM3_MOUSE	Grm3
QSF_RASF2.5.46	2.85784	8.43e-07	0.000136153	RPTN_HUMAN Repetin	RPTN_HUMAN	RPTN
QSF_contig_050778	6.05769	9.61e-07	0.000153789	#N/A	#N/A	#N/A
QSF_contig_008525	4.35035	1.01e-06	0.000159643	#N/A	#N/A	#N/A
QSF_contig_006249	6.10529	1.02e-06	0.000159643	DDL_RHOE4 D-alanine--D-alanine ligase {ECO:0000255|HAMAP-Rule:MF_00047}	DDL_RHOE4	ddl
QSF_contig_054821	3.86739	1.11e-06	0.000171272	TM6S2_RAT Transmembrane 6 superfamily member 2	TM6S2_RAT	Tm6sf2
QSF_contig_019632	-2.51149	1.11e-06	0.000171272	CIO1B_SALSA Probable cytosolic iron-sulfur protein assembly protein ciao1-B {ECO:0000255|HAMAP-Rule:MF_03037}	CIO1B_SALSA	ciao1b
QSF_RAB8A.11.50	4.47451	1.2e-06	0.000182788	#N/A	#N/A	#N/A
QSF_YO84.90.131	2.56904	1.21e-06	0.000183495	RTXE_DROME Probable RNA-directed DNA polymerase from transposon X-element	RTXE_DROME	X-element\ORF2
QSF_IFIT5.13.19	3.97166	1.23e-06	0.000184926	TCB1_CAEBR Transposable element Tcb1 transposase	TCB1_CAEBR	#N/A
QSF_CAV3.2.3	3.75227	1.27e-06	0.000188542	PGCA_STAS1 Phosphoglucomutase	PGCA_STAS1	pgcA
QSF_MALAT1.1.1	1.91735	1.3e-06	0.000191007	YSL7_ARATH Probable metal-nicotianamine transporter YSL7	YSL7_ARATH	YSL7
QSF_CNPY4.210.306	2.78756	1.34e-06	0.000196204	TMP_BPDP1 Tape measure protein	TMP_BPDP1	TMP
QSF_ERAL.23.96	2.53799	1.36e-06	0.000196204	VP6_ROTGA Intermediate capsid protein VP6	VP6_ROTGA	#N/A
QSF_contig_065813	1.45805	1.4e-06	0.000198356	#N/A	#N/A	#N/A
QSF_VOLCADRAFT_56229.1.1	4.23096	1.4e-06	0.000198356	YMO3_PANSE Uncharacterized protein in mobD 3'region	YMO3_PANSE	#N/A
QSF_contig_019821	3.65195	1.41e-06	0.000198356	SURE_DINSH 5'-nucleotidase SurE {ECO:0000255|HAMAP-Rule:MF_00060}	SURE_DINSH	surE
QSF_TIFA.1.87	2.80186	1.44e-06	0.000198356	#N/A	#N/A	#N/A
QSF_GNDS.106.284	3.77212	1.44e-06	0.000198356	TCB1_CAEBR Transposable element Tcb1 transposase	TCB1_CAEBR	#N/A
QSF_contig_052818	-3.36776	1.44e-06	0.000198356	CISY_TETTH Citrate synthase, mitochondrial	CISY_TETTH	#N/A
QSF_contig_041768	3.68123	1.45e-06	0.000198356	#N/A	#N/A	#N/A
QSF_FAM65A.3.4	7.64448	1.62e-06	0.000219421	KLHL3_DANRE Kelch-like protein 3	KLHL3_DANRE	klhl3
QSF_contig_010498	3.6142	1.64e-06	0.000219582	#N/A	#N/A	#N/A
QSF_LOC101482129.3.6	-6.85631	1.81e-06	0.00023972	RS24_TAKRU 40S ribosomal protein S24	RS24_TAKRU	rps24
QSF_ND5.2.3	-3.386	1.82e-06	0.00023972	NU5M_SALSA NADH-ubiquinone oxidoreductase chain 5	NU5M_SALSA	MT-ND5
QSF_LOC100702758.1.1	-5.66316	2e-06	0.000260906	RL27A_XENLA 60S ribosomal protein L27a	RL27A_XENLA	rpl27a
QSF_PLCG2.1.2	-7.05301	2.01e-06	0.000260906	PLCG2_HUMAN 1-phosphatidylinositol 4,5-bisphosphate phosphodiesterase gamma-2	PLCG2_HUMAN	PLCG2
QSF_contig_059758	5.82318	2.1e-06	0.00027081	#N/A	#N/A	#N/A
QSF_SYIC.2.2	-7.11772	2.13e-06	0.000272231	SYIC_MOUSE Isoleucine--tRNA ligase, cytoplasmic	SYIC_MOUSE	Iars1
QSF_LOC100707681.7.10	-6.68849	2.14e-06	1	#N/A	#N/A	#N/A
QSF_contig_060334	7.4203	2.21e-06	0.00027968	#N/A	#N/A	#N/A
QSF_DYHC.1.7	7.75087	2.23e-06	0.00027968	#N/A	#N/A	#N/A
QSF_LOC100689872.1.1	5.61558	2.24e-06	0.00027968	SETD2_MOUSE Histone-lysine N-methyltransferase SETD2	SETD2_MOUSE	Setd2
QSF_LOC100535678.1.1	4.23606	2.27e-06	0.000279962	NAL12_HUMAN NACHT, LRR and PYD domains-containing protein 12	NAL12_HUMAN	NLRP12
QSF_LIPS.1.170	2.57998	2.27e-06	0.000279962	#N/A	#N/A	#N/A
QSF_contig_040497	3.85257	2.32e-06	0.000281487	GLMU_HYDS0 Bifunctional protein GlmU {ECO:0000255|HAMAP-Rule:MF_01631}	GLMU_HYDS0	glmU
QSF_contig_031243	4.01525	2.32e-06	0.000281487	DNLJ_ANADF DNA ligase {ECO:0000255|HAMAP-Rule:MF_01588}	DNLJ_ANADF	ligA
QSF_CCD12.3.4	3.96595	2.34e-06	0.000282237	#N/A	#N/A	#N/A
QSF_HABP2.1.1	-2.6562	2.56e-06	0.000306014	HABP2_MOUSE Hyaluronan-binding protein 2	HABP2_MOUSE	Habp2
QSF_SPRE.14.32	2.65167	2.65e-06	0.000314683	#N/A	#N/A	#N/A
QSF_CRBL2.62.80	6.04761	2.77e-06	0.000325871	#N/A	#N/A	#N/A
QSF_PPIA.10.10	5.82402	2.78e-06	0.000325871	NU2M_SALSA NADH-ubiquinone oxidoreductase chain 2	NU2M_SALSA	MT-ND2
QSF_contig_033857	3.06581	2.86e-06	0.000332345	DAPA_NEIMF 4-hydroxy-tetrahydrodipicolinate synthase {ECO:0000255|HAMAP-Rule:MF_00418}	DAPA_NEIMF	dapA
QSF_ADSSL1.16.25	3.0593	2.91e-06	0.000336215	TAN1_YEAST tRNA acetyltransferase TAN1	TAN1_YEAST	TAN1
QSF_VRK3.47.924	2.17161	2.94e-06	0.000337201	TCB1_CAEBR Transposable element Tcb1 transposase	TCB1_CAEBR	#N/A
QSF_RNA45S5.3.6	3.88343	3.03e-06	0.000345798	G6PD_TAKRU Glucose-6-phosphate 1-dehydrogenase	G6PD_TAKRU	g6pd
QSF_CLCC1.65.218	6.10055	3.58e-06	0.000402208	TCB2_CAEBR Transposable element Tcb2 transposase	TCB2_CAEBR	#N/A
QSF_SMYD1B.28.33	2.83378	3.58e-06	0.000402208	CRED_ECOLI Inner membrane protein CreD	CRED_ECOLI	creD
QSF_GNDS.105.284	3.23466	3.6e-06	0.000402208	TC1A_CAEEL Transposable element Tc1 transposase	TC1A_CAEEL	tc1a
QSF_contig_016385	3.81681	3.63e-06	0.000402932	ABI1_HUMAN Abl interactor 1	ABI1_HUMAN	ABI1
QSF_FAM65A.4.4	7.10708	3.7e-06	0.000407793	MIAB_ARTS2 tRNA-2-methylthio-N(6)-dimethylallyladenosine synthase {ECO:0000255|HAMAP-Rule:MF_01864}	MIAB_ARTS2	miaB
QSF_contig_033489	4.78141	3.78e-06	0.00041366	CBPY_SCHPO Carboxypeptidase Y	CBPY_SCHPO	cpy1
QSF_FINTRIM.42.110	4.80156	3.86e-06	0.000419436	TRI14_HUMAN Tripartite motif-containing protein 14	TRI14_HUMAN	TRIM14
QSF_SPON2.62.112	3.72416	3.97e-06	0.000429175	#N/A	#N/A	#N/A
QSF_CLCC1.85.218	5.61937	4.15e-06	0.000444693	Y2259_MYCBO Uncharacterized SURF1-like protein Mb2259	Y2259_MYCBO	BQ2027_MB2259
QSF_LOC101162682.1.1	2.3083	4.17e-06	0.000444693	IML1_USTMA Vacuolar membrane-associated protein IML1	IML1_USTMA	IML1
QSF_TIFA.85.87	3.00983	4.48e-06	0.000475307	TC1A_CAEEL Transposable element Tc1 transposase	TC1A_CAEEL	tc1a
QSF_LOC100709668.1.3	2.49209	4.67e-06	0.000492043	YRD6_CAEEL Uncharacterized protein K02A2.6	YRD6_CAEEL	K02A2.6
QSF_P-RAS.2.41	-6.47963	4.74e-06	1	#N/A	#N/A	#N/A
QSF_RS14.6.24	-7.01755	4.77e-06	0.000499182	RS14_MOUSE 40S ribosomal protein S14	RS14_MOUSE	Rps14
QSF_RTJK.35.35	2.29341	4.82e-06	0.000501223	YTX2_XENLA Transposon TX1 uncharacterized 149 kDa protein	YTX2_XENLA	#N/A
QSF_IGFBP2.2.3	6.23811	5e-06	0.000513697	PHR4B_XENLA Phosphatase and actin regulator 4-B	PHR4B_XENLA	phactr4-b
QSF_LOC101155246.1.1	5.07171	5e-06	0.000513697	WDR26_DANRE WD repeat-containing protein 26	WDR26_DANRE	wdr26
QSF_RN45S.3.9	3.95925	5.42e-06	0.000553122	RRT15_YEAST Regulator of rDNA transcription protein 15	RRT15_YEAST	RRT15
QSF_contig_017497	3.63217	5.6e-06	0.000568012	#N/A	#N/A	#N/A
QSF_RSSA.15.31	-5.62982	5.74e-06	0.000579327	RSSA_SALSA 40S ribosomal protein SA {ECO:0000255|HAMAP-Rule:MF_03016}	RSSA_SALSA	rpsa
QSF_contig_025901	6.45015	5.83e-06	0.000584831	YHED_BACSU Endospore coat-associated protein YheD	YHED_BACSU	yheD
QSF_SOCS3.1.5	-2.46439	5.9e-06	0.000587768	SOCS3_CHICK Suppressor of cytokine signaling 3	SOCS3_CHICK	SOCS3
QSF_RS2.22.26	-3.25756	6.05e-06	0.000599239	RS2_ICTPU 40S ribosomal protein S2	RS2_ICTPU	rps2
QSF_CRLS1.31.41	4.87512	6.56e-06	0.000645184	#N/A	#N/A	#N/A
QSF_contig_062068	3.26139	6.59e-06	0.000645184	#N/A	#N/A	#N/A
QSF_contig_028669	5.95726	6.79e-06	0.000660314	#N/A	#N/A	#N/A
QSF_RL12.7.9	-4.31971	6.83e-06	0.000660677	RL12_MOUSE 60S ribosomal protein L12	RL12_MOUSE	Rpl12
QSF_UB2R2.17.42	2.99109	6.91e-06	0.000664322	LIN1_NYCCO LINE-1 reverse transcriptase homolog	LIN1_NYCCO	#N/A
QSF_SYIC.1.2	5.21827	7.16e-06	0.000682528	SYIC_HUMAN Isoleucine--tRNA ligase, cytoplasmic	SYIC_HUMAN	IARS1
QSF_VRK3.35.924	2.33834	7.18e-06	0.000682528	#N/A	#N/A	#N/A
QSF_GRINA.5.16	2.63623	7.24e-06	0.000684373	ERB1_HUMAN Endogenous retrovirus group PABLB member 1 Env polyprotein	ERB1_HUMAN	ERVPABLB-1
QSF_contig_069212	5.74369	7.51e-06	0.000705898	ACUK_TRIVH Transcription activator of gluconeogenesis TRV_01442	ACUK_TRIVH	TRV_01442
QSF_ITM2A.1.7	3.2891	7.57e-06	0.000707611	#N/A	#N/A	#N/A
QSF_contig_052814	-3.42569	7.71e-06	0.00071694	PAL2_ORYSJ Phenylalanine ammonia-lyase	PAL2_ORYSJ	ZB8
QSF_M-CSFR.4.8	6.26717	8.21e-06	0.000759135	CSF11_TAKRU Macrophage colony-stimulating factor 1 receptor 1	CSF11_TAKRU	csf1r1
QSF_GNDS.45.284	3.23983	8.38e-06	0.000770008	TC1A_CAEEL Transposable element Tc1 transposase	TC1A_CAEEL	tc1a
QSF_FBLI1.1.7	2.61168	8.42e-06	0.000770106	#N/A	#N/A	#N/A
QSF_contig_035084	2.30565	8.52e-06	0.000775008	AMYG_YEAST Glucoamylase, intracellular sporulation-specific	AMYG_YEAST	SGA1
QSF_LOC100194624.1.7	4.96167	8.65e-06	0.000781804	ALDOA_SALSA Fructose-bisphosphate aldolase A {ECO:0000303|PubMed:23786287}	ALDOA_SALSA	#N/A
QSF_contig_019172	-2.97184	8.71e-06	0.000781804	SYC_BAUCH Cysteine--tRNA ligase {ECO:0000255|HAMAP-Rule:MF_00041}	SYC_BAUCH	cysS
QSF_contig_035120	4.67943	8.74e-06	0.000781804	#N/A	#N/A	#N/A
QSF_UBE2F.6.6	3.8612	9.17e-06	0.000815569	YL004_HUMAN Putative uncharacterized protein FLJ45999	YL004_HUMAN	#N/A
QSF_contig_007168	5.21801	9.36e-06	0.000828644	GLNA_RHOSH Glutamine synthetase	GLNA_RHOSH	#N/A
QSF_LOC100561123.2.3	1.93852	9.75e-06	0.00085833	RTJK_DROFU RNA-directed DNA polymerase from mobile element jockey	RTJK_DROFU	jockey\pol
QSF_contig_050608	5.72813	9.84e-06	0.000861508	TRFM_RABIT Melanotransferrin	TRFM_RABIT	MELTF
QSF_contig_010368	4.77782	1.02e-05	0.000885241	EFR3_COCIM Protein EFR3	EFR3_COCIM	EFR3
QSF_LOC567670.1.4	5.18452	1.03e-05	0.000889229	HERC1_HUMAN Probable E3 ubiquitin-protein ligase HERC1	HERC1_HUMAN	HERC1
QSF_CRBL2.56.80	3.72649	1.08e-05	0.000934329	YMO3_PANSE Uncharacterized protein in mobD 3'region	YMO3_PANSE	#N/A
QSF_DTX3L.2.5	6.06326	1.1e-05	0.000940672	TPK3_ORYSJ Thiamine pyrophosphokinase 3	TPK3_ORYSJ	TPK3
QSF_RTJK.6.35	4.08533	1.11e-05	0.000947312	RTJK_DROME RNA-directed DNA polymerase from mobile element jockey	RTJK_DROME	pol
QSF_YO84.104.131	2.95419	1.12e-05	0.000948301	RTBS_DROME Probable RNA-directed DNA polymerase from transposon BS	RTBS_DROME	RTase
QSF_VGA.1.1	-3.54065	1.12e-05	0.000948301	VGA_BPS13 A' protein	VGA_BPS13	A
QSF_ARH.2.3	3.38719	1.23e-05	0.00103112	#N/A	#N/A	#N/A
QSF_LOC100136797.12.31	5.02859	1.23e-05	0.00103112	#N/A	#N/A	#N/A
QSF_STX3.2.6	-7.12186	1.27e-05	0.00105458	STX3_MOUSE Syntaxin-3	STX3_MOUSE	Stx3
QSF_RPL38.6.19	-5.6811	1.32e-05	1	RL38_RAT 60S ribosomal protein L38	RL38_RAT	Rpl38
QSF_CRBL2.76.80	3.12363	1.33e-05	0.00109668	#N/A	#N/A	#N/A
QSF_PVDB.1.1	2.64177	1.33e-05	0.00109668	PVDB_PLAKN Duffy receptor beta form	PVDB_PLAKN	#N/A
QSF_TUBGCP2.1.1	3.92473	1.35e-05	0.00110538	CHI2_CANAL Chitinase 2	CHI2_CANAL	CHT2
QSF_LOC100352819.1.1	4.17543	1.42e-05	0.00116129	ART2_YEAST Putative uncharacterized protein ART2	ART2_YEAST	ART2
QSF_contig_061543	4.04924	1.46e-05	0.00117903	#N/A	#N/A	#N/A
QSF_FA55C.163.197	1.92457	1.46e-05	0.00117903	TCB1_CAEBR Transposable element Tcb1 transposase	TCB1_CAEBR	#N/A
QSF_UBXD2.2.8	2.73826	1.53e-05	0.00123088	ZBED5_CANLF Zinc finger BED domain-containing protein 5	ZBED5_CANLF	ZBED5
QSF_MAG.3.6	4.61579	1.55e-05	0.00124314	MAG_RAT Myelin-associated glycoprotein	MAG_RAT	Mag
QSF_LOC101076707.1.2	1.99801	1.58e-05	0.00125865	SDPR_RAT Serum deprivation-response protein	SDPR_RAT	#N/A
QSF_NEMVEDRAFT_V1G245263.1.2	3.27395	1.6e-05	0.00126093	TITIN_MOUSE Titin	TITIN_MOUSE	Ttn
QSF_SNX18.68.68	2.41311	1.6e-05	0.00126093	#N/A	#N/A	#N/A
QSF_B2M.9.18	2.54688	1.61e-05	0.00126475	#N/A	#N/A	#N/A
QSF_NEMVEDRAFT_V1G112287.1.1	5.81678	1.67e-05	0.00130261	BIGA_SALTY Putative surface-exposed virulence protein BigA	BIGA_SALTY	bigA
QSF_PLSI.2.2	5.03359	1.71e-05	0.00133348	PLSI_MOUSE Plastin-1	PLSI_MOUSE	Pls1
QSF_LOC100136004.7.24	-2.6145	1.74e-05	0.00134548	EF1A2_XENLA Elongation factor 1-alpha, oocyte form	EF1A2_XENLA	eef1ao
QSF_P66A.3.3	-6.40091	1.74e-05	1	P66A_HUMAN Transcriptional repressor p66-alpha	P66A_HUMAN	GATAD2A
QSF_TRHY.2.9	-2.78032	1.79e-05	0.00138266	#N/A	#N/A	#N/A
QSF_contig_052505	4.14951	1.81e-05	0.00138456	#N/A	#N/A	#N/A
QSF_TPBG.4.11	5.53087	1.81e-05	0.00138456	PAXB1_MOUSE PAX3- and PAX7-binding protein 1	PAXB1_MOUSE	Paxbp1
QSF_RAB8A.30.50	4.02122	1.89e-05	0.00143717	FOCA_ECOLI Probable formate transporter 1	FOCA_ECOLI	focA
QSF_LOC101481096.20.61	3.76109	1.92e-05	0.0014401	TRIL_MOUSE TLR4 interactor with leucine rich repeats	TRIL_MOUSE	Tril
QSF_contig_045519	3.20555	1.93e-05	0.0014401	#N/A	#N/A	#N/A
QSF_CLUS.19.23	3.08895	1.93e-05	0.0014401	SUN1_MOUSE SUN domain-containing protein 1	SUN1_MOUSE	Sun1
QSF_S2533.18.19	5.7124	1.93e-05	0.0014401	#N/A	#N/A	#N/A
QSF_contig_008344	5.60278	1.94e-05	0.0014401	#N/A	#N/A	#N/A
QSF_LOC100707314.5.9	3.51628	1.96e-05	0.00144212	#N/A	#N/A	#N/A
QSF_contig_034526	4.20704	1.97e-05	0.00144212	Y138_METJA Putative glutamine amidotransferase-like protein MJ0138	Y138_METJA	MJ0138
QSF_contig_041793	5.79967	1.98e-05	0.00144212	#N/A	#N/A	#N/A
QSF_TMM43.134.138	5.57589	1.98e-05	0.00144212	TC1A_CAEEL Transposable element Tc1 transposase	TC1A_CAEEL	tc1a
QSF_LOC100136000.6.14	3.55626	1.98e-05	0.00144212	TRI11_BOVIN E3 ubiquitin-protein ligase TRIM11	TRI11_BOVIN	TRIM11
QSF_contig_000413	3.45079	2.02e-05	0.00146255	#N/A	#N/A	#N/A
QSF_LOC101483165.1.1	-6.10239	2.05e-05	0.00147477	YH24_CAEEL Putative aminopeptidase W07G4.4	YH24_CAEEL	lap-2
QSF_contig_010512	5.8704	2.06e-05	0.00147477	#N/A	#N/A	#N/A
QSF_LOC100702839.2.4	-6.31768	2.08e-05	1	#N/A	#N/A	#N/A
QSF_contig_026181	3.85841	2.09e-05	0.00149145	#N/A	#N/A	#N/A
QSF_contig_010746	2.48805	2.1e-05	0.00149145	COBL1_MOUSE Cordon-bleu protein-like 1	COBL1_MOUSE	Cobll1
QSF_contig_035405	3.07433	2.15e-05	0.00151895	LORF2_HUMAN LINE-1 retrotransposable element ORF2 protein	LORF2_HUMAN	#N/A
QSF_SMYD1B.12.33	4.2742	2.16e-05	0.00152427	#N/A	#N/A	#N/A
QSF_LOC101076811.2.4	5.59074	2.18e-05	0.001532	ANO5_HUMAN Anoctamin-5	ANO5_HUMAN	ANO5
QSF_GNDS.158.284	2.7862	2.19e-05	0.00153404	TC1A_CAEEL Transposable element Tc1 transposase	TC1A_CAEEL	tc1a
QSF_contig_043667	4.32698	2.21e-05	0.0015389	IF2_BORBU Translation initiation factor IF-2	IF2_BORBU	infB
QSF_contig_036950	4.49105	2.25e-05	0.00155776	UREF_RUEST Urease accessory protein UreF {ECO:0000255|HAMAP-Rule:MF_01385}	UREF_RUEST	ureF
QSF_LOC563583.1.1	2.75679	2.28e-05	0.0015742	#N/A	#N/A	#N/A
QSF_LOC100700081.1.1	4.91681	2.3e-05	0.00158171	ANX11_HUMAN Annexin A11	ANX11_HUMAN	ANXA11
QSF_PSMG1.1.10	1.96001	2.33e-05	0.0015921	HIS5_BACFN Imidazole glycerol phosphate synthase subunit HisH {ECO:0000255|HAMAP-Rule:MF_00278}	HIS5_BACFN	hisH
QSF_SNX9.1.5	2.01592	2.34e-05	0.0015921	SNX9_HUMAN Sorting nexin-9	SNX9_HUMAN	SNX9
QSF_LOC101070066.1.1	-3.31907	2.34e-05	0.0015921	F133_CHICK Protein FAM133	F133_CHICK	FAM133
QSF_contig_035186	2.7582	2.36e-05	0.00159633	DPP3_NEMVE Dipeptidyl peptidase 3	DPP3_NEMVE	dpp3
QSF_contig_017336	3.7711	2.47e-05	0.00166072	#N/A	#N/A	#N/A
QSF_SNX18.2.68	3.71268	2.48e-05	0.00166072	FMRA_CALPA Antho-RFamide neuropeptides	FMRA_CALPA	#N/A
QSF_ZYRO0F02728G.1.1	5.637	2.52e-05	0.00168073	PER_DROPS Period circadian protein	PER_DROPS	per
QSF_RS5.16.17	-3.4234	2.53e-05	0.00168073	RS5_HUMAN 40S ribosomal protein S5	RS5_HUMAN	RPS5
QSF_CLCC1.127.218	3.79732	2.58e-05	0.00171288	#N/A	#N/A	#N/A
QSF_RN18S.1.2	3.84065	2.59e-05	0.00171288	TAR1_YEAST Protein TAR1	TAR1_YEAST	TAR1
QSF_LOC101076390.29.60	4.00694	2.61e-05	0.00171339	TCB1_CAEBR Transposable element Tcb1 transposase	TCB1_CAEBR	#N/A
QSF_LOC100575042.1.2	4.96465	2.62e-05	0.00171339	VDAC1_SOLTU Mitochondrial outer membrane protein porin of 34 kDa	VDAC1_SOLTU	#N/A
QSF_RL13A.4.11	-2.62264	2.68e-05	0.00174674	RL13A_SALTR 60S ribosomal protein L13a	RL13A_SALTR	rpl13a
QSF_VAPA.6.9	3.81552	2.71e-05	0.0017638	VAPA_PONAB Vesicle-associated membrane protein-associated protein A	VAPA_PONAB	VAPA
QSF_LDB3.1.2	3.49727	2.72e-05	0.0017638	LDB3_MOUSE LIM domain-binding protein 3	LDB3_MOUSE	Ldb3
QSF_STIM1.4.5	-3.66691	2.77e-05	0.00178697	STIM1_HUMAN Stromal interaction molecule 1	STIM1_HUMAN	STIM1
QSF_contig_033514	5.2191	2.84e-05	0.00182741	#N/A	#N/A	#N/A
QSF_MEPD.5.5	2.05187	2.9e-05	0.00185442	#N/A	#N/A	#N/A
QSF_MUC22.5.5	5.21262	2.94e-05	0.0018749	CUG1A_TENMO Pupal cuticle protein G1A	CUG1A_TENMO	#N/A
QSF_EHD3.6.6	4.72011	3.06e-05	0.0019344	#N/A	#N/A	#N/A
QSF_LOC101165464.11.13	3.55708	3.06e-05	0.0019344	NLRC3_MOUSE Protein NLRC3	NLRC3_MOUSE	Nlrc3
QSF_T2EA.2.2	3.31648	3.07e-05	0.00193684	T2EA_BOVIN General transcription factor IIE subunit 1	T2EA_BOVIN	GTF2E1
QSF_TIFA.58.87	3.89357	3.11e-05	0.00195358	DLG1_DROME Disks large 1 tumor suppressor protein	DLG1_DROME	dlg1
QSF_contig_025777	3.1246	3.16e-05	0.00197408	#N/A	#N/A	#N/A
QSF_contig_002192	4.02444	3.18e-05	0.0019788	#N/A	#N/A	#N/A
QSF_LOC100699891.20.27	4.10156	3.2e-05	0.00198356	SV2C_HUMAN Synaptic vesicle glycoprotein 2C	SV2C_HUMAN	SV2C
QSF_NFYB.4.6	-4.45633	3.21e-05	0.00198356	NFYB_BOVIN Nuclear transcription factor Y subunit beta	NFYB_BOVIN	NFYB
QSF_LOC100305135.2.8	4.94119	3.22e-05	0.00198356	YBOX1_XENLA Nuclease-sensitive element-binding protein 1	YBOX1_XENLA	ybx1
QSF_PSAP.1.4	-3.12292	3.3e-05	0.0020168	SAP_BOVIN Prosaposin	SAP_BOVIN	PSAP
QSF_PERQ1.4.4	-5.10069	3.3e-05	0.0020168	PERQ1_MOUSE PERQ amino acid-rich with GYF domain-containing protein 1	PERQ1_MOUSE	#N/A
QSF_LOC100004199.1.3	-2.39681	3.31e-05	0.0020168	SYIC_ENCCU Probable isoleucine--tRNA ligase, cytoplasmic	SYIC_ENCCU	ECU11_1100
QSF_CLCC1.157.218	3.65276	3.32e-05	0.0020172	TCB2_CAEBR Transposable element Tcb2 transposase	TCB2_CAEBR	#N/A
QSF_CRGM2.1.1	4.39623	3.34e-05	0.00201922	CRGM2_CHIID Gamma-crystallin M2	CRGM2_CHIID	GM2
QSF_MD19B.1.1	4.88508	3.37e-05	0.00203171	MD19A_DANRE Mediator of RNA polymerase II transcription subunit 19-A	MD19A_DANRE	med19a
QSF_JMJD1C.1.4	3.18695	3.56e-05	0.00213708	RRF_ZYMMO Ribosome-recycling factor {ECO:0000255|HAMAP-Rule:MF_00040}	RRF_ZYMMO	frr
QSF_LOC560685.1.1	-1.734	3.6e-05	0.0021535	H4_XENTR Histone H4	H4_XENTR	TGas006m08.1
QSF_INT8.34.36	3.83646	3.7e-05	0.00220599	#N/A	#N/A	#N/A
QSF_LOC100699891.10.27	4.15874	3.84e-05	0.00227555	SYS_CHLPN Serine--tRNA ligase {ECO:0000255|HAMAP-Rule:MF_00176}	SYS_CHLPN	serS
QSF_LOC100700425.2.2	-2.28477	3.87e-05	0.00227555	RL5_CHICK 60S ribosomal protein L5	RL5_CHICK	RPL5
QSF_CLCC1.116.218	4.60896	3.88e-05	0.00227555	Y1674_SULAC Uncharacterized protein Saci_1674	Y1674_SULAC	Saci_1674
QSF_LOC101162887.1.1	5.2205	3.88e-05	0.00227555	HMGN3_CHICK High mobility group nucleosome-binding domain-containing protein 3	HMGN3_CHICK	HMGN3
QSF_contig_045062	2.19374	3.88e-05	0.00227555	#N/A	#N/A	#N/A
QSF_LOC101473847.1.1	4.91206	3.91e-05	0.00228546	FBX2_BOVIN F-box only protein 2	FBX2_BOVIN	FBXO2
QSF_contig_015709	3.28999	3.94e-05	0.00229272	PME2_ARATH Pectinesterase 2	PME2_ARATH	PME2
QSF_KR161.3.6	3.94031	3.95e-05	0.00229272	TEN2_CHICK Teneurin-2	TEN2_CHICK	TENM2
QSF_RPB1.7.26	3.1404	4.04e-05	0.00232416	CCD15_HUMAN Coiled-coil domain-containing protein 15	CCD15_HUMAN	CCDC15
QSF_ASAL.1.2	-2.40373	4.05e-05	0.00232416	LEC_GALNI Mannose-specific lectin	LEC_GALNI	#N/A
QSF_contig_010460	2.88641	4.05e-05	0.00232416	A2MG_PONAB Alpha-2-macroglobulin	A2MG_PONAB	A2M
QSF_contig_045361	4.16853	4.07e-05	0.00233012	CAPS_CAEBR Calcium-dependent secretion activator	CAPS_CAEBR	unc-31
QSF_LOC100699891.8.27	4.60204	4.23e-05	0.00241289	MSRB1_BOVIN Methionine-R-sulfoxide reductase B1	MSRB1_BOVIN	MSRB1
QSF_contig_035138	5.692	4.26e-05	0.00241716	#N/A	#N/A	#N/A
QSF_contig_053092	4.09008	4.29e-05	0.00242814	#N/A	#N/A	#N/A
QSF_DBNLA.1.1	4.72364	4.33e-05	0.0024436	DBNLA_XENLA Drebrin-like protein A	DBNLA_XENLA	dbnl-a
QSF_contig_043809	4.64445	4.37e-05	0.00245857	#N/A	#N/A	#N/A
QSF_LOC100136387.22.42	-3.95684	4.39e-05	0.00246121	ANF_OREMO Natriuretic peptides A	ANF_OREMO	nppa
QSF_LOC100367910.1.2	3.08665	4.5e-05	0.00250284	RTJK_DROME RNA-directed DNA polymerase from mobile element jockey	RTJK_DROME	pol
QSF_B2M.16.18	-4.20549	4.5e-05	0.00250284	B2MG_ICTPU Beta-2-microglobulin	B2MG_ICTPU	b2m
QSF_contig_001299	5.2168	4.53e-05	0.00251127	ERVV2_HUMAN Endogenous retrovirus group V member 2 Env polyprotein	ERVV2_HUMAN	ERVV-2
QSF_CLCC1.163.218	5.10053	4.55e-05	0.00251284	ATG12_PICGU Ubiquitin-like protein ATG12	ATG12_PICGU	ATG12
QSF_LOC100693043.2.2	5.54237	4.58e-05	0.00252306	DHR13_BOVIN Dehydrogenase/reductase SDR family member 13	DHR13_BOVIN	DHRS13
QSF_contig_031135	5.43233	4.6e-05	0.00252306	CAPSD_PASV1 Capsid polyprotein VP90	CAPSD_PASV1	ORF2
QSF_contig_036511	3.9532	4.61e-05	0.00252306	GP179_HUMAN Probable G-protein coupled receptor 179	GP179_HUMAN	GPR179
QSF_contig_035586	5.01633	4.64e-05	0.00252761	PLSB_PHOLL Glycerol-3-phosphate acyltransferase {ECO:0000255|HAMAP-Rule:MF_00393}	PLSB_PHOLL	plsB
QSF_TIFA.82.87	2.90097	4.65e-05	0.00252761	#N/A	#N/A	#N/A
QSF_ACOX1.19.39	4.59163	4.67e-05	0.00252761	HIS8_CAMJD Histidinol-phosphate aminotransferase {ECO:0000255|HAMAP-Rule:MF_01023}	HIS8_CAMJD	hisC
QSF_CXCR3.47.55	5.01942	4.68e-05	0.00252761	SMAKA_XENLA Small membrane A-kinase anchor protein	SMAKA_XENLA	#N/A
QSF_YO84.110.131	4.19732	4.72e-05	0.00252761	#N/A	#N/A	#N/A
QSF_CRBL2.21.80	5.18933	4.72e-05	0.00252761	#N/A	#N/A	#N/A
QSF_CG030.52.68	5.15889	4.72e-05	0.00252761	#N/A	#N/A	#N/A
QSF_CLCC1.175.218	4.56825	4.77e-05	0.00254019	RNY_LEUCK Ribonuclease Y {ECO:0000255|HAMAP-Rule:MF_00335}	RNY_LEUCK	rny
QSF_contig_061582	3.2083	4.79e-05	0.00254019	#N/A	#N/A	#N/A
QSF_LOXE3.1.2	-2.9184	4.79e-05	0.00254019	LOXE3_HUMAN Hydroperoxide isomerase ALOXE3	LOXE3_HUMAN	ALOXE3
QSF_POPTRDRAFT_794316.20.27	2.74136	4.84e-05	0.00255517	TCB1_CAEBR Transposable element Tcb1 transposase	TCB1_CAEBR	#N/A
QSF_CCL21.9.15	3.32471	4.85e-05	0.00255517	CCL21_MACMU C-C motif chemokine 21	CCL21_MACMU	CCL21
QSF_RAB31.196.298	2.86793	4.99e-05	0.00262166	TCB1_CAEBR Transposable element Tcb1 transposase	TCB1_CAEBR	#N/A
QSF_FA55C.40.197	3.16371	5.02e-05	0.00262818	PLCX1_HUMAN PI-PLC X domain-containing protein 1	PLCX1_HUMAN	PLCXD1
QSF_CLCC1.108.218	4.80523	5.06e-05	0.00264121	ATG12_PICGU Ubiquitin-like protein ATG12	ATG12_PICGU	ATG12
QSF_UB2R2.11.42	2.45494	5.08e-05	0.00264121	#N/A	#N/A	#N/A
QSF_FKBP3.39.116	5.60688	5.1e-05	0.00264121	YCF80_GUITH Uncharacterized protein ycf80	YCF80_GUITH	ycf80
QSF_LOC101485217.1.2	3.74369	5.14e-05	0.00265575	#N/A	#N/A	#N/A
QSF_VA0E2.1.12	2.29227	5.25e-05	0.00269897	DNLJ_PSEU5 DNA ligase {ECO:0000255|HAMAP-Rule:MF_01588}	DNLJ_PSEU5	ligA
QSF_contig_030680	3.3752	5.26e-05	0.00269897	#N/A	#N/A	#N/A
QSF_contig_006920	5.74707	5.29e-05	0.00270644	#N/A	#N/A	#N/A
QSF_contig_024187	-2.58755	5.32e-05	0.00271625	SUI1_METJA Protein translation factor SUI1 homolog {ECO:0000255|HAMAP-Rule:MF_00604}	SUI1_METJA	MJ0463
QSF_FKBP3.37.116	2.0604	5.34e-05	0.00271894	FKBP3_BOVIN Peptidyl-prolyl cis-trans isomerase FKBP3	FKBP3_BOVIN	FKBP3
QSF_LIPS.148.170	4.87826	5.36e-05	0.00271894	TC3A_CAEEL Transposable element Tc3 transposase	TC3A_CAEEL	tc3a
QSF_LOC101481518.1.1	-6.02525	5.47e-05	1	MY18B_HUMAN Unconventional myosin-XVIIIb	MY18B_HUMAN	MYO18B
QSF_CG030.1.68	5.21515	5.52e-05	0.00279144	#N/A	#N/A	#N/A
QSF_C170B.2.3	-2.2683	5.58e-05	0.00281218	C170B_XENTR Centrosomal protein of 170 kDa protein B	C170B_XENTR	cep170b
QSF_LOC101481096.60.61	4.07716	5.61e-05	0.00281947	CML1_RAT Chemokine-like receptor 1	CML1_RAT	Cmklr1
QSF_U88.3.57	3.82387	5.67e-05	0.00284243	#N/A	#N/A	#N/A
QSF_YHU2.4.6	5.46754	5.72e-05	0.00285958	YHU2_SCHPO Uncharacterized threonine-rich GPI-anchored glycoprotein PJ4664.02	YHU2_SCHPO	SPBPJ4664.02
QSF_FKBP3.41.116	2.83488	5.79e-05	0.0028823	TCB1_CAEBR Transposable element Tcb1 transposase	TCB1_CAEBR	#N/A
QSF_contig_050072	2.92082	5.88e-05	0.00292034	DPP3_NEMVE Dipeptidyl peptidase 3	DPP3_NEMVE	dpp3
QSF_WDTC1.1.1	-2.24988	5.93e-05	0.00293785	WDTC1_HUMAN WD and tetratricopeptide repeats protein 1	WDTC1_HUMAN	WDTC1
QSF_contig_024368	-2.52357	6.1e-05	0.00301052	#N/A	#N/A	#N/A
QSF_FA55C.56.197	4.54772	6.25e-05	0.00307873	TCB2_CAEBR Transposable element Tcb2 transposase	TCB2_CAEBR	#N/A
QSF_contig_062050	2.99299	6.31e-05	0.00309584	#N/A	#N/A	#N/A
QSF_RL36A.7.13	-4.543	6.37e-05	0.00311705	RL36A_TAKRU 60S ribosomal protein L36a	RL36A_TAKRU	rpl36a
QSF_TRDN.8.11	-5.28397	6.39e-05	0.00311868	TRDN_RAT Triadin	TRDN_RAT	Trdn
QSF_contig_019219	2.95358	6.43e-05	0.00312897	PRIS_THEVO DNA primase small subunit PriS {ECO:0000255|HAMAP-Rule:MF_00700}	PRIS_THEVO	priS
QSF_CT027.7.14	-1.82111	6.46e-05	0.00313318	DPS1_MOUSE Decaprenyl-diphosphate synthase subunit 1	DPS1_MOUSE	Pdss1
QSF_contig_019228	-2.99051	6.53e-05	0.00315964	UVRC_LACGA UvrABC system protein C {ECO:0000255|HAMAP-Rule:MF_00203}	UVRC_LACGA	uvrC
QSF_AQP1.3.9	2.94146	6.63e-05	0.00319817	Y481_PSYCK Maf-like protein Pcryo_0481 {ECO:0000255|HAMAP-Rule:MF_00528}	Y481_PSYCK	#N/A
QSF_contig_008282	3.1904	6.66e-05	0.00320135	#N/A	#N/A	#N/A
QSF_UB2R2.16.42	4.16831	6.85e-05	0.00328621	TC1A_CAEEL Transposable element Tc1 transposase	TC1A_CAEEL	tc1a
QSF_LOC587493.1.2	2.75469	6.89e-05	0.00329331	RTJK_DROFU RNA-directed DNA polymerase from mobile element jockey	RTJK_DROFU	jockey\pol
QSF_VRK3.365.924	2.32055	6.92e-05	0.00329949	#N/A	#N/A	#N/A
QSF_contig_054739	3.12097	6.98e-05	0.00331962	#N/A	#N/A	#N/A
QSF_OX2G.9.9	3.50356	7.05e-05	0.00333958	#N/A	#N/A	#N/A
QSF_ACACA.2.3	-7.15798	7.06e-05	0.00333958	ACACA_MOUSE Acetyl-CoA carboxylase 1	ACACA_MOUSE	Acaca
QSF_SRSF4.1.3	-3.32897	7.15e-05	0.00336175	SRSF4_MOUSE Serine/arginine-rich splicing factor 4	SRSF4_MOUSE	Srsf4
QSF_VRK3.582.924	2.62269	7.15e-05	0.00336175	TCB1_CAEBR Transposable element Tcb1 transposase	TCB1_CAEBR	#N/A
QSF_NEMVEDRAFT_V1G123504.1.3	4.56667	7.2e-05	0.00336765	PRIC1_HUMAN Prickle-like protein 1	PRIC1_HUMAN	PRICKLE1
QSF_LOC100136664.3.4	-2.80211	7.23e-05	0.00336765	MRP_HUMAN MARCKS-related protein	MRP_HUMAN	MARCKSL1
QSF_contig_007642	2.17286	7.24e-05	0.00336765	#N/A	#N/A	#N/A
QSF_CLCC1.86.218	2.37	7.26e-05	0.00336765	TCB2_CAEBR Transposable element Tcb2 transposase	TCB2_CAEBR	#N/A
QSF_contig_045184	2.68074	7.27e-05	0.00336765	#N/A	#N/A	#N/A
QSF_GNDS.43.284	2.45501	7.33e-05	0.00338134	TCB2_CAEBR Transposable element Tcb2 transposase	TCB2_CAEBR	#N/A
QSF_B2M.1.18	3.19172	7.34e-05	0.00338134	B2MG_ICTPU Beta-2-microglobulin	B2MG_ICTPU	b2m
QSF_RNA45S5.1.6	2.8968	7.36e-05	0.00338134	ART2_YEAST Putative uncharacterized protein ART2	ART2_YEAST	ART2
QSF_HIRP3.1.29	4.21838	7.38e-05	0.00338134	#N/A	#N/A	#N/A
QSF_GBG12.10.53	3.20998	7.4e-05	0.00338472	#N/A	#N/A	#N/A
QSF_contig_062096	2.68451	7.44e-05	0.00338973	#N/A	#N/A	#N/A
QSF_contig_045071	2.44043	7.52e-05	0.00341325	HXD12_CHICK Homeobox protein Hox-D12	HXD12_CHICK	HOXD12
QSF_ENV.8.21	3.38352	7.53e-05	0.00341325	EFC1_HUMAN Endogenous retrovirus group FC1 Env polyprotein	EFC1_HUMAN	ERVFC1
QSF_RTJK.26.35	2.01708	7.6e-05	0.00343452	RTJK_DROME RNA-directed DNA polymerase from mobile element jockey	RTJK_DROME	pol
QSF_HPBP1.3.29	5.83967	7.66e-05	0.0034537	#N/A	#N/A	#N/A
QSF_LOC100702410.1.1	4.8689	7.72e-05	0.00347292	RINI_PIG Ribonuclease inhibitor	RINI_PIG	RNH1
QSF_RPB1.19.26	3.67337	7.75e-05	0.00347451	CCD15_HUMAN Coiled-coil domain-containing protein 15	CCD15_HUMAN	CCDC15
QSF_LOC101487254.1.3	-1.23037	7.92e-05	0.00353178	PKHA5_HUMAN Pleckstrin homology domain-containing family A member 5	PKHA5_HUMAN	PLEKHA5
QSF_LOC100316864.75.459	4.87255	7.93e-05	0.00353178	TCB1_CAEBR Transposable element Tcb1 transposase	TCB1_CAEBR	#N/A
QSF_H3.1.2	-1.88498	7.94e-05	0.00353178	H3_URECA Histone H3	H3_URECA	#N/A
QSF_LOC100702622.2.4	3.45301	7.97e-05	0.00353568	NLRP3_BOVIN NACHT, LRR and PYD domains-containing protein 3	NLRP3_BOVIN	NLRP3
QSF_CIRBP.1.24	-3.03494	8.13e-05	0.00359727	CIRBB_XENLA Cold-inducible RNA-binding protein B	CIRBB_XENLA	cirbp-b
QSF_FKBP3.86.116	5.21502	8.26e-05	0.00364384	MURC_JANMA UDP-N-acetylmuramate--L-alanine ligase {ECO:0000255|HAMAP-Rule:MF_00046}	MURC_JANMA	murC
QSF_contig_041846	5.72741	8.31e-05	0.00365791	#N/A	#N/A	#N/A
QSF_STK16.11.12	2.94144	8.59e-05	0.00377119	DI3L2_ARATH DIS3-like exonuclease 2 {ECO:0000255|HAMAP-Rule:MF_03045}	DI3L2_ARATH	SOV
QSF_RTBS.20.42	2.57934	8.75e-05	0.00383332	RTJK_DROFU RNA-directed DNA polymerase from mobile element jockey	RTJK_DROFU	jockey\pol
QSF_UB2R2.9.42	2.07353	8.79e-05	0.00384077	#N/A	#N/A	#N/A
QSF_contig_001221	1.62658	8.91e-05	0.00386901	VPS36_DANRE Vacuolar protein-sorting-associated protein 36	VPS36_DANRE	vps36
QSF_contig_030581	3.57577	8.94e-05	0.00386901	ARGC_PELTS N-acetyl-gamma-glutamyl-phosphate reductase {ECO:0000255|HAMAP-Rule:MF_00150}	ARGC_PELTS	argC
QSF_EIF4A1.1.1	-3.02952	8.95e-05	0.00386901	IF4A1_PONAB Eukaryotic initiation factor 4A-I	IF4A1_PONAB	EIF4A1
QSF_RL32.11.21	-5.75359	8.95e-05	0.00386901	RL32_BOVIN 60S ribosomal protein L32	RL32_BOVIN	RPL32
QSF_P4R2A.11.39	3.46184	9.01e-05	0.00388407	TC1A_CAEEL Transposable element Tc1 transposase	TC1A_CAEEL	tc1a
QSF_contig_025239	-6.16662	9.04e-05	1	ZN468_HUMAN Zinc finger protein 468	ZN468_HUMAN	ZNF468
QSF_YAP1.1.1	2.96934	9.09e-05	0.00390731	YAP1_DANRE Transcriptional coactivator YAP1	YAP1_DANRE	yap1
QSF_TM163.36.72	2.95106	9.11e-05	0.00390731	GLNA_BACFR Glutamine synthetase	GLNA_BACFR	#N/A
QSF_EXTN1.6.6	4.5348	9.17e-05	0.00392168	CNTRL_MOUSE Centriolin	CNTRL_MOUSE	Cntrl
QSF_CD9.32.37	3.66788	9.4e-05	0.00400891	#N/A	#N/A	#N/A
QSF_VRK3.234.924	5.40989	9.7e-05	0.00412642	TCB1_CAEBR Transposable element Tcb1 transposase	TCB1_CAEBR	#N/A
QSF_contig_060267	4.055	9.73e-05	0.00412642	YBCI_BACSU Uncharacterized protein YbcI	YBCI_BACSU	ybcI
QSF_UB2R2.37.42	2.52679	9.75e-05	0.00412642	#N/A	#N/A	#N/A
QSF_contig_044984	2.8399	9.83e-05	0.00415246	#N/A	#N/A	#N/A
QSF_UN119.9.16	6.1701	0.000100822	0.00423821	TBL1R_HUMAN F-box-like/WD repeat-containing protein TBL1XR1	TBL1R_HUMAN	TBL1XR1
QSF_contig_021463	-2.36523	0.000100861	0.00423821	NDB4G_UROYA Antimicrobial peptide UyCT1 {ECO:0000303|PubMed:23182832}	NDB4G_UROYA	#N/A
QSF_TBCA.2.2	3.07111	0.000102136	0.00428095	TBCA_CHICK Tubulin-specific chaperone A	TBCA_CHICK	TBCA
QSF_VRK3.145.924	2.39614	0.000102393	0.00428095	TCB1_CAEBR Transposable element Tcb1 transposase	TCB1_CAEBR	#N/A
QSF_LOC100561123.3.3	1.63921	0.000103404	0.00430462	RTJK_DROFU RNA-directed DNA polymerase from mobile element jockey	RTJK_DROFU	jockey\pol
QSF_contig_033998	3.30098	0.000103476	0.00430462	#N/A	#N/A	#N/A
QSF_PLCB3.125.169	4.97716	0.000104048	0.00431762	#N/A	#N/A	#N/A
QSF_NEMVEDRAFT_V1G241673.1.1	3.94161	0.00010483	0.00433921	ANK2_HUMAN Ankyrin-2	ANK2_HUMAN	ANK2
QSF_ZGC_158409.5.5	-4.35437	0.00010498	1	HM14A_CHICK Non-histone chromosomal protein HMG-14A	HM14A_CHICK	#N/A
QSF_LOC101481096.50.61	3.12088	0.000106878	0.00441303	TCB2_CAEBR Transposable element Tcb2 transposase	TCB2_CAEBR	#N/A
QSF_contig_036412	4.91721	0.00010962	0.00451505	Y1816_SHEON UPF0319 protein SO_1816 {ECO:0000255|HAMAP-Rule:MF_00789}	Y1816_SHEON	SO_1816
QSF_GNDS.263.284	3.53767	0.000112472	0.00462105	TC1A_CAEEL Transposable element Tc1 transposase	TC1A_CAEEL	tc1a
QSF_contig_046686	3.61154	0.000113295	0.0046434	OR4DA_HUMAN Olfactory receptor 4D10	OR4DA_HUMAN	OR4D10
QSF_contig_035185	3.54172	0.000114729	0.00467372	#N/A	#N/A	#N/A
QSF_TIFA.36.87	4.54049	0.000115017	0.00467372	TC1A_CAEEL Transposable element Tc1 transposase	TC1A_CAEEL	tc1a
QSF_SKAP2.1.2	4.09749	0.000115075	0.00467372	PSIJ_DICDI Protein psiJ	PSIJ_DICDI	psiJ
QSF_LOC100699176.1.1	2.19455	0.000115158	0.00467372	RORB_HUMAN Nuclear receptor ROR-beta	RORB_HUMAN	RORB
QSF_UB2R2.24.42	2.04961	0.000117673	0.00476416	#N/A	#N/A	#N/A
QSF_RN152.1.2	-1.49563	0.000117976	0.00476486	RN186_HUMAN RING finger protein 186	RN186_HUMAN	RNF186
QSF_LOC101481096.24.61	3.32545	0.000121981	0.0049147	MDH_DESAP Malate dehydrogenase {ECO:0000255|HAMAP-Rule:MF_00487}	MDH_DESAP	mdh
QSF_LOC101076390.2.60	2.96373	0.000122998	0.0049437	TC1A_CAEEL Transposable element Tc1 transposase	TC1A_CAEEL	tc1a
QSF_TMED2.1.6	4.51995	0.000123403	0.00494803	TMED2_MOUSE Transmembrane emp24 domain-containing protein 2	TMED2_MOUSE	Tmed2
QSF_contig_043342	4.62975	0.000124772	0.00499087	WDHD1_XENLA WD repeat and HMG-box DNA-binding protein 1	WDHD1_XENLA	wdhd1
QSF_CT054.17.53	5.30151	0.000126866	0.00505727	TCB1_CAEBR Transposable element Tcb1 transposase	TCB1_CAEBR	#N/A
QSF_CLCC1.194.218	3.16927	0.00012704	0.00505727	NU5M_BRAFL NADH-ubiquinone oxidoreductase chain 5	NU5M_BRAFL	ND5
QSF_LOC101483904.14.14	5.2509	0.000127646	0.00506928	RL13A_SALTR 60S ribosomal protein L13a	RL13A_SALTR	rpl13a
QSF_MINP1.2.2	3.34585	0.000128237	0.00507485	MINP1_MOUSE Multiple inositol polyphosphate phosphatase 1	MINP1_MOUSE	Minpp1
QSF_SPD2B.5.48	4.5444	0.000128396	0.00507485	#N/A	#N/A	#N/A
QSF_VRK3.39.924	2.9738	0.000129598	0.00510947	#N/A	#N/A	#N/A
QSF_RS8.10.15	-2.02381	0.000129886	0.00510947	RS8_RAT 40S ribosomal protein S8	RS8_RAT	Rps8
QSF_EPOR.8.25	5.47739	0.000131113	0.00514555	SPIKE_CVMA5 Spike glycoprotein	SPIKE_CVMA5	S
QSF_LOC101482051.2.2	5.01092	0.000131901	0.00515038	GLSK_HUMAN Glutaminase kidney isoform, mitochondrial	GLSK_HUMAN	GLS
QSF_contig_016638	4.25413	0.000132277	0.00515038	CDK8_CAEEL Cyclin-dependent kinase 8	CDK8_CAEEL	cdk-8
QSF_CG057.97.247	3.13861	0.000132435	0.00515038	RPB1_PLAFD DNA-directed RNA polymerase II subunit RPB1	RPB1_PLAFD	RPII
QSF_ITM2A.5.7	2.2882	0.000132474	0.00515038	#N/A	#N/A	#N/A
QSF_GGNB2.46.101	2.37166	0.000134813	0.00522913	BUD3_ASHGO Bud site selection protein 3 homolog	BUD3_ASHGO	BUD3
QSF_LOC568500.2.5	2.57881	0.000136145	0.00526848	WRIP1_SCHPO ATPase WRNIP1 homolog C26H5.02c	WRIP1_SCHPO	SPAC26H5.02c
QSF_LOC100135859.8.16	-3.96087	0.000136938	0.00528689	RS6_ONCMY 40S ribosomal protein S6	RS6_ONCMY	rps6
QSF_TMM43.75.138	2.84468	0.000138337	0.00532854	TCB1_CAEBR Transposable element Tcb1 transposase	TCB1_CAEBR	#N/A
QSF_contig_050829	3.2772	0.000139074	0.00534454	#N/A	#N/A	#N/A
QSF_contig_010704	5.54378	0.000140522	0.00538595	#N/A	#N/A	#N/A
QSF_VRK3.52.924	3.4932	0.000140799	0.00538595	TC1A_CAEEL Transposable element Tc1 transposase	TC1A_CAEEL	tc1a
QSF_LDLR.1.1	-5.51696	0.000140934	1	LRP8_CHICK Low-density lipoprotein receptor-related protein 8	LRP8_CHICK	LRP8
QSF_RS3.1.11	-3.28946	0.000143109	0.00546179	RS31_XENLA 40S ribosomal protein S3-A	RS31_XENLA	rps3-a
QSF_LOC571124.1.1	2.15792	0.000144419	0.00549405	GIMA4_HUMAN GTPase IMAP family member 4	GIMA4_HUMAN	GIMAP4
QSF_LOC101475606.5.7	4.7088	0.000144615	0.00549405	GATB_LACAC Aspartyl/glutamyl-tRNA(Asn/Gln) amidotransferase subunit B {ECO:0000255|HAMAP-Rule:MF_00121}	GATB_LACAC	gatB
QSF_PP2AA.165.445	2.60233	0.000145206	0.00550395	GCS2_NITMU Putative glutamate--cysteine ligase 2 {ECO:0000255|HAMAP-Rule:MF_01609}	GCS2_NITMU	Nmul_A1548
QSF_LOC101468123.1.1	5.24318	0.000146252	0.00552503	#N/A	#N/A	#N/A
QSF_contig_046275	3.4476	0.00014671	0.00552503	VOZ2_ARATH Transcription factor VOZ2	VOZ2_ARATH	VOZ2
QSF_CLCC1.105.218	3.29981	0.000146922	0.00552503	GPHRB_HUMAN Golgi pH regulator B	GPHRB_HUMAN	GPR89B
QSF_LOC100370705.1.1	3.10231	0.000147091	0.00552503	FP1V1_PERVI Foot protein 1 variant 1 {ECO:0000303|PubMed:15203964, ECO:0000303|PubMed:19584055, ECO:0000312|EMBL:AAY46226.1}	FP1V1_PERVI	fp-1
QSF_SPON2.18.112	4.89848	0.000150877	0.00564262	#N/A	#N/A	#N/A
QSF_SPD2B.2.48	4.13347	0.000151215	0.00564262	SAP13_ARATH Zinc finger AN1 and C2H2 domain-containing stress-associated protein 13	SAP13_ARATH	SAP13
QSF_LOC100711158.1.1	4.52178	0.000151238	0.00564262	SEM6D_PONAB Semaphorin-6D	SEM6D_PONAB	SEMA6D
QSF_contig_045070	3.50843	0.000152179	0.00566502	#N/A	#N/A	#N/A
QSF_contig_016270	3.23555	0.000154007	0.00571101	CADH2_ORYSJ Cinnamyl alcohol dehydrogenase 2	CADH2_ORYSJ	CAD2
QSF_YO84.75.131	2.61826	0.000154101	0.00571101	#N/A	#N/A	#N/A
QSF_TIFA.26.87	4.44113	0.000154836	0.0057255	#N/A	#N/A	#N/A
QSF_MA6D1.13.21	-3.47399	0.000158303	0.00584073	MUTS_PROMT DNA mismatch repair protein MutS {ECO:0000255|HAMAP-Rule:MF_00096}	MUTS_PROMT	mutS
QSF_YO84.76.131	6.18416	0.000159381	0.00584997	TAPT1_XENLA Transmembrane anterior posterior transformation protein 1 homolog	TAPT1_XENLA	tapt1
QSF_ERGI3.55.87	2.71365	0.000159827	0.00584997	TC1A_CAEEL Transposable element Tc1 transposase	TC1A_CAEEL	tc1a
QSF_contig_061534	2.21047	0.000159952	0.00584997	#N/A	#N/A	#N/A
QSF_LOC100194706.54.87	3.05823	0.000160028	0.00584997	TC1A_CAEEL Transposable element Tc1 transposase	TC1A_CAEEL	tc1a
QSF_RAB31.19.298	3.57147	0.00016034	0.00584997	TC3A_CAEEL Transposable element Tc3 transposase	TC3A_CAEEL	tc3a
QSF_GRINA.8.16	3.34388	0.000160663	0.00584997	#N/A	#N/A	#N/A
QSF_VRK3.304.924	3.38582	0.000164788	0.00597048	#N/A	#N/A	#N/A
QSF_WEE1.3.18	3.19833	0.000165031	0.00597048	F186A_MOUSE Protein FAM186A	F186A_MOUSE	FAM186A
QSF_PDLI2.31.36	-2.12003	0.000165049	0.00597048	#N/A	#N/A	#N/A
QSF_SEPT8.113.153	3.40351	0.000167274	0.00603783	TOP3A_ORYSJ DNA topoisomerase 3-alpha	TOP3A_ORYSJ	TOP3A
QSF_LOC101158432.1.1	-2.13318	0.000168576	0.00607165	NUCL_XENLA Nucleolin	NUCL_XENLA	ncl
QSF_contig_019360	5.34825	0.000169129	0.00607841	PEG3_BOVIN Paternally-expressed gene 3 protein	PEG3_BOVIN	PEG3
QSF_LIPS.63.170	2.58251	0.000174636	0.00626281	EFTS_DESPS Elongation factor Ts {ECO:0000255|HAMAP-Rule:MF_00050}	EFTS_DESPS	tsf
QSF_RPLP1.7.17	-5.97972	0.000175443	1	RLA1_MOUSE 60S acidic ribosomal protein P1	RLA1_MOUSE	Rplp1
QSF_contig_030918	2.41345	0.000178058	0.00637181	#N/A	#N/A	#N/A
QSF_FA55C.71.197	4.69383	0.000178871	0.00638715	TCB2_CAEBR Transposable element Tcb2 transposase	TCB2_CAEBR	#N/A
QSF_CLCC1.172.218	3.6526	0.000179898	0.00640355	MED8_YARLI Mediator of RNA polymerase II transcription subunit 8	MED8_YARLI	MED8
QSF_contig_024847	5.07632	0.000180134	0.00640355	#N/A	#N/A	#N/A
QSF_contig_048661	1.09938	0.000180593	0.00640355	YSL7_ARATH Probable metal-nicotianamine transporter YSL7	YSL7_ARATH	YSL7
QSF_VRK3.759.924	1.7181	0.000181088	0.00640355	TCB1_CAEBR Transposable element Tcb1 transposase	TCB1_CAEBR	#N/A
QSF_contig_002624	3.17313	0.000181254	0.00640355	#N/A	#N/A	#N/A
QSF_LOC100316864.362.459	5.6603	0.000186755	0.00657387	TC1A_CAEEL Transposable element Tc1 transposase	TC1A_CAEEL	tc1a
QSF_LOC101078388.13.15	3.19666	0.00018696	0.00657387	ASCC3_RAT Activating signal cointegrator 1 complex subunit 3	ASCC3_RAT	Ascc3
QSF_LOC100136664.4.4	-3.62555	0.000187146	1	MRP_RAT MARCKS-related protein	MRP_RAT	Marcksl1
QSF_NEMVEDRAFT_V1G137305.2.2	3.34494	0.000187543	0.00657387	UVRC_KORVE UvrABC system protein C {ECO:0000255|HAMAP-Rule:MF_00203}	UVRC_KORVE	uvrC
QSF_AASD1.2.3	3.61778	0.000187806	0.00657387	GLNE_IDILO Glutamate-ammonia-ligase adenylyltransferase {ECO:0000255|HAMAP-Rule:MF_00802}	GLNE_IDILO	glnE
QSF_LOC100498323.1.1	4.99893	0.000188273	0.00657387	STAD2_ORYSJ Stearoyl-[acyl-carrier-protein] 9-desaturase 2, chloroplastic	STAD2_ORYSJ	SSI2
QSF_RL17.11.17	-5.36536	0.000188446	0.00657387	RL17_RAT 60S ribosomal protein L17	RL17_RAT	Rpl17
QSF_FMN2.2.6	3.67246	0.000191402	0.00666085	FLP03_CAEEL FMRFamide-like neuropeptides 3	FLP03_CAEEL	flp-3
QSF_contig_017318	2.14972	0.00019174	0.00666085	SPIKE_CVPR8 Spike glycoprotein	SPIKE_CVPR8	S
QSF_KR103.1.1	4.75037	0.000193372	0.00670357	SPR1B_MOUSE Cornifin-B	SPR1B_MOUSE	Sprr1b
QSF_RS6.2.11	-3.55781	0.000194917	0.00674309	RS6_ONCMY 40S ribosomal protein S6	RS6_ONCMY	rps6
QSF_TIFA.64.87	4.08594	0.000197068	0.00680333	#N/A	#N/A	#N/A
QSF_VRK3.824.924	2.59442	0.000199509	0.00687336	TCB1_CAEBR Transposable element Tcb1 transposase	TCB1_CAEBR	#N/A
QSF_GNDS.208.284	2.75706	0.000201179	0.00690376	TCB1_CAEBR Transposable element Tcb1 transposase	TCB1_CAEBR	#N/A
QSF_SOCS3B.1.1	-3.25211	0.000201221	0.00690376	#N/A	#N/A	#N/A
QSF_LOC101156399.1.1	-2.95473	0.000205441	0.00703403	C1GTB_DANRE Glycoprotein-N-acetylgalactosamine 3-beta-galactosyltransferase 1-B	C1GTB_DANRE	c1galt1b
QSF_LOC100376823.1.1	1.82776	0.000206672	0.00706164	YHS4_SCHPO Putative cell agglutination protein C947.04	YHS4_SCHPO	#N/A
QSF_IRF-3.24.26	4.33316	0.000210001	0.00716071	#N/A	#N/A	#N/A
QSF_ATG5.45.83	3.45278	0.000212248	0.00722173	#N/A	#N/A	#N/A
QSF_LOC568500.5.5	2.16435	0.000212659	0.00722173	WRIP1_SCHPO ATPase WRNIP1 homolog C26H5.02c	WRIP1_SCHPO	SPAC26H5.02c
QSF_LOC100488428.1.1	5.02795	0.000214214	0.00724654	RTJK_DROFU RNA-directed DNA polymerase from mobile element jockey	RTJK_DROFU	jockey\pol
QSF_VRK3.318.924	2.54986	0.000214566	0.00724654	TC1A_CAEEL Transposable element Tc1 transposase	TC1A_CAEEL	tc1a
QSF_contig_007696	3.38246	0.000215102	0.00724654	#N/A	#N/A	#N/A
QSF_SPD2B.27.48	2.6884	0.000215132	0.00724654	HXD12_CHICK Homeobox protein Hox-D12	HXD12_CHICK	HOXD12
QSF_PP2AA.322.445	4.33481	0.00021895	0.00733964	TP1A_MALDO Thaumatin-like protein 1a	TP1A_MALDO	TL1
QSF_TGT.7.36	2.72226	0.000219145	0.00733964	GLI2_CHICK Zinc finger protein GLI2 {ECO:0000305}	GLI2_CHICK	GLI2
QSF_contig_008243	2.44791	0.000219905	0.00733964	MHR1_CANAL Mitochondrial homologous recombination protein 1	MHR1_CANAL	MHR1
QSF_NUTF2.28.44	1.89083	0.000220295	0.00733964	TCB1_CAEBR Transposable element Tcb1 transposase	TCB1_CAEBR	#N/A
QSF_PAQR3.3.5	2.62775	0.000220312	0.00733964	PAQR3_HUMAN Progestin and adipoQ receptor family member 3	PAQR3_HUMAN	PAQR3
QSF_contig_051378	2.84954	0.000220542	0.00733964	MYP_STRPU Major yolk protein	MYP_STRPU	#N/A
QSF_contig_015881	4.34917	0.000222483	0.00738278	#N/A	#N/A	#N/A
QSF_APOBB.1.1	5.06414	0.000222726	0.00738278	APOB_HUMAN Apolipoprotein B-100	APOB_HUMAN	APOB
QSF_CLCC1.186.218	3.15372	0.000223338	0.00738835	ALKS_PSEOL HTH-type transcriptional regulator AlkS	ALKS_PSEOL	alkS
QSF_GMPPB.1.1	2.52596	0.00022418	0.00740151	GMPPB_DANRE Mannose-1-phosphate guanyltransferase beta	GMPPB_DANRE	gmppb
QSF_LOC101484327.1.1	3.08832	0.000225687	0.00743651	SNG1_RAT Synaptogyrin-1	SNG1_RAT	Syngr1
QSF_LOC101156699.1.1	4.61794	0.000226521	0.00744922	SESN1_MACFA Sestrin-1	SESN1_MACFA	SESN1
QSF_contig_053750	-3.01374	0.000228099	0.00747459	RRT12_YEAST Subtilase-type proteinase RRT12	RRT12_YEAST	RRT12
QSF_TPBG.7.11	3.70784	0.00022819	0.00747459	YTX2_XENLA Transposon TX1 uncharacterized 149 kDa protein	YTX2_XENLA	#N/A
QSF_SPD2B.34.48	3.53603	0.000229907	0.007516	COS_DROPS Kinesin-like protein costa	COS_DROPS	cos
QSF_CLCC1.93.218	4.37947	0.000231253	0.00754519	ASNS2_PEA Asparagine synthetase, root [glutamine-hydrolyzing]	ASNS2_PEA	AS2
QSF_LOC100367391.1.2	3.52875	0.000234462	0.00763492	RRF_ZYMMO Ribosome-recycling factor {ECO:0000255|HAMAP-Rule:MF_00040}	RRF_ZYMMO	frr
QSF_VRK3.221.924	4.18712	0.000235086	0.00763521	TCB1_CAEBR Transposable element Tcb1 transposase	TCB1_CAEBR	#N/A
QSF_CLCC1.154.218	2.26854	0.000235389	0.00763521	TCB1_CAEBR Transposable element Tcb1 transposase	TCB1_CAEBR	#N/A
QSF_VIPR1.58.153	1.85254	0.000236087	0.00764297	RTJK_DROFU RNA-directed DNA polymerase from mobile element jockey	RTJK_DROFU	jockey\pol
QSF_LOC100703997.3.3	4.10695	0.00023716	0.0076628	MA7D1_MOUSE MAP7 domain-containing protein 1	MA7D1_MOUSE	Map7d1
QSF_OXER1.1.1	2.55235	0.000237831	0.00766611	HCAR2_RAT Hydroxycarboxylic acid receptor 2	HCAR2_RAT	Hcar2
QSF_UREE.1.2	4.44336	0.000238184	0.00766611	F120B_MOUSE Constitutive coactivator of peroxisome proliferator-activated receptor gamma	F120B_MOUSE	Fam120b
QSF_contig_034759	2.49685	0.000242741	0.00779144	GLGC_BACHD Glucose-1-phosphate adenylyltransferase {ECO:0000255|HAMAP-Rule:MF_00624}	GLGC_BACHD	glgC
QSF_CC45L.4.4	-3.86511	0.000243014	0.00779144	CDC45_HUMAN Cell division control protein 45 homolog	CDC45_HUMAN	CDC45
QSF_VRK3.852.924	3.63788	0.000246184	0.00787061	TCB1_CAEBR Transposable element Tcb1 transposase	TCB1_CAEBR	#N/A
QSF_contig_024915	5.52973	0.00024643	0.00787061	RAD5_DEBHA DNA repair protein RAD5	RAD5_DEBHA	RAD5
QSF_PLCB3.39.169	2.21126	0.000247503	0.00788976	MPH1_KLULA ATP-dependent DNA helicase MPH1 {ECO:0000250|UniProtKB:P40562}	MPH1_KLULA	MPH1
QSF_SFPQ.7.10	1.95997	0.000251252	0.00799396	#N/A	#N/A	#N/A
QSF_TM2D3.5.15	4.28845	0.000252754	0.00802608	RXFP1_PONAB Relaxin receptor 1	RXFP1_PONAB	RXFP1
QSF_contig_059804	4.33174	0.000253632	0.00802608	FLAA_BORBU Flagellar filament outer layer protein	FLAA_BORBU	flaA
QSF_SUMF2.28.30	3.14268	0.000253709	0.00802608	#N/A	#N/A	#N/A
QSF_VRK3.559.924	2.30137	0.000255048	0.00805314	TCB1_CAEBR Transposable element Tcb1 transposase	TCB1_CAEBR	#N/A
QSF_FINTRIM.26.110	1.89727	0.000256286	0.0080769	TRI16_HUMAN Tripartite motif-containing protein 16	TRI16_HUMAN	TRIM16
QSF_CLCC1.200.218	4.53008	0.000261506	0.00822582	TC1A_CAEEL Transposable element Tc1 transposase	TC1A_CAEEL	tc1a
QSF_contig_045520	4.61044	0.000262499	0.00824148	URE1_PSEF5 Urease subunit alpha {ECO:0000255|HAMAP-Rule:MF_01953}	URE1_PSEF5	ureC
QSF_RAB31.147.298	2.82551	0.00026501	0.00830463	TC1A_CAEEL Transposable element Tc1 transposase	TC1A_CAEEL	tc1a
QSF_contig_033617	4.24156	0.000267735	0.00837426	NEK8_HUMAN Serine/threonine-protein kinase Nek8	NEK8_HUMAN	NEK8
QSF_FKBP3.48.116	2.8083	0.000269641	0.00840594	TCB1_CAEBR Transposable element Tcb1 transposase	TCB1_CAEBR	#N/A
QSF_contig_018007	2.35651	0.000269758	0.00840594	P2C73_ORYSJ Probable protein phosphatase 2C 73	P2C73_ORYSJ	Os11g0109000
QSF_LOC101476944.1.1	1.29483	0.000271316	0.00843123	RORB_HUMAN Nuclear receptor ROR-beta	RORB_HUMAN	RORB
QSF_contig_015856	3.5803	0.000271583	0.00843123	#N/A	#N/A	#N/A
QSF_LOC100316864.224.459	3.50155	0.000274348	0.00850121	TC1A_CAEEL Transposable element Tc1 transposase	TC1A_CAEEL	tc1a
QSF_VLPE.1.2	5.10156	0.000282299	0.00873132	VLPE_MYCHR Variant surface antigen E	VLPE_MYCHR	vlpE
QSF_CLCC1.115.218	5.41955	0.00028336	0.00874788	PROA_PROMA Gamma-glutamyl phosphate reductase {ECO:0000255|HAMAP-Rule:MF_00412}	PROA_PROMA	proA
QSF_GGNB2.33.101	2.48817	0.000286846	0.00883911	#N/A	#N/A	#N/A
QSF_TM163.10.72	4.03616	0.000288802	0.00888291	FMT_AQUAE Methionyl-tRNA formyltransferase	FMT_AQUAE	fmt
QSF_C1QC.1.3	4.41551	0.000290867	0.00892993	#N/A	#N/A	#N/A
QSF_UBQL4.7.14	4.89978	0.000291993	0.00894388	GAL1_CALS4 Galactokinase {ECO:0000255|HAMAP-Rule:MF_00246}	GAL1_CALS4	galK
QSF_CLCC1.64.218	2.92522	0.000292396	0.00894388	ATG12_PICGU Ubiquitin-like protein ATG12	ATG12_PICGU	ATG12
QSF_VRK3.491.924	3.76739	0.000294584	0.00897937	TCB1_CAEBR Transposable element Tcb1 transposase	TCB1_CAEBR	#N/A
QSF_contig_018646	3.95297	0.000295039	0.00897937	TRPE_BUCPS Anthranilate synthase component 1	TRPE_BUCPS	trpE
QSF_CLCC1.92.218	3.10091	0.000295175	0.00897937	TC1A_CAEEL Transposable element Tc1 transposase	TC1A_CAEEL	tc1a
QSF_PHOCN.1.3	2.31662	0.00029637	0.00898741	PHOCN_RAT MOB-like protein phocein	PHOCN_RAT	Mob4
QSF_QRIC2.1.6	3.82957	0.000296679	0.00898741	QRIC2_HUMAN Glutamine-rich protein 2	QRIC2_HUMAN	QRICH2
QSF_NOS2.9.35	3.47484	0.00029706	0.00898741	GPDA_LACSS Glycerol-3-phosphate dehydrogenase [NAD(P)+] {ECO:0000255|HAMAP-Rule:MF_00394}	GPDA_LACSS	gpsA
QSF_CLCC1.196.218	4.08445	0.000297675	0.00898967	#N/A	#N/A	#N/A
QSF_NT5C3.2.4	2.41219	0.000298672	0.00900345	#N/A	#N/A	#N/A
QSF_contig_032799	4.57799	0.000305089	0.00918026	VEF_GVTN Viral-enhancing factor	VEF_GVTN	VEF
QSF_LOC101070788.1.1	2.97538	0.000305928	0.00918889	KLH33_HUMAN Kelch-like protein 33	KLH33_HUMAN	KLHL33
QSF_SPON2.39.112	3.13415	0.00030849	0.00921007	GPA33_HUMAN Cell surface A33 antigen	GPA33_HUMAN	GPA33
QSF_contig_050739	3.89709	0.00030946	0.00921007	BARD1_MOUSE BRCA1-associated RING domain protein 1	BARD1_MOUSE	Bard1
QSF_MSMB.4.6	-4.56362	0.000309653	0.00921007	MSMP_MOUSE Prostate-associated microseminoprotein	MSMP_MOUSE	Msmp
QSF_GLO2.99.140	4.24042	0.000309752	0.00921007	TCB2_CAEBR Transposable element Tcb2 transposase	TCB2_CAEBR	#N/A
QSF_contig_010204	4.59158	0.000310079	0.00921007	#N/A	#N/A	#N/A
QSF_LOC100136000.7.14	1.97953	0.000310387	0.00921007	#N/A	#N/A	#N/A
QSF_RL9.5.13	4.87745	0.000310508	0.00921007	RL9_ICTPU 60S ribosomal protein L9	RL9_ICTPU	rpl9
QSF_VRK3.684.924	3.08672	0.000312813	0.00926193	TC1A_CAEEL Transposable element Tc1 transposase	TC1A_CAEEL	tc1a
QSF_contig_045218	3.4181	0.000314173	0.00928567	POL5_DROME Retrovirus-related Pol polyprotein from transposon opus	POL5_DROME	pol
QSF_VRK3.605.924	3.76341	0.000316428	0.00933574	TCB2_CAEBR Transposable element Tcb2 transposase	TCB2_CAEBR	#N/A
QSF_LOC101487662.34.35	1.76758	0.000319432	0.00939419	TCB1_CAEBR Transposable element Tcb1 transposase	TCB1_CAEBR	#N/A
QSF_LOC100136156.7.14	-1.52526	0.000319639	0.00939419	HG2A_RAT H-2 class II histocompatibility antigen gamma chain	HG2A_RAT	Cd74
QSF_LOC100707983.1.1	4.2051	0.000320601	0.00939419	FZD3_HUMAN Frizzled-3	FZD3_HUMAN	FZD3
QSF_FKBP3.69.116	3.06974	0.000320667	0.00939419	#N/A	#N/A	#N/A
QSF_CXCR3.35.55	1.82634	0.000323008	0.00944614	#N/A	#N/A	#N/A
QSF_VATH.2.3	2.84754	0.00032759	0.00954927	#N/A	#N/A	#N/A
QSF_LOC555628.2.2	3.5822	0.000327682	0.00954927	IPIL2_HUMAN Inositol 1,4,5-trisphosphate receptor-interacting protein-like 2	IPIL2_HUMAN	ITPRIPL2
QSF_H2AV.1.5	-4.94789	0.000328704	1	H2AV_XENTR Histone H2A.V	H2AV_XENTR	h2az2
QSF_FA55C.134.197	3.48363	0.000329646	0.0095877	#N/A	#N/A	#N/A
QSF_contig_036335	2.72302	0.000330713	0.0095877	#N/A	#N/A	#N/A
QSF_SWP2.8.8	-3.44461	0.00033073	0.0095877	SANT_PLAF7 S-antigen protein	SANT_PLAF7	PF10_0343
QSF_RAB31.66.298	2.37611	0.000332186	0.00961317	TC1A_CAEEL Transposable element Tc1 transposase	TC1A_CAEEL	tc1a
QSF_LOC100136292.2.14	3.50466	0.000334986	0.00967737	#N/A	#N/A	#N/A
QSF_RAB31.159.298	4.19918	0.000336862	0.00971471	TC1A_CAEEL Transposable element Tc1 transposase	TC1A_CAEEL	tc1a
QSF_contig_030726	2.84098	0.000338575	0.00974721	BUD13_CHICK BUD13 homolog	BUD13_CHICK	BUD13
QSF_HPBP1.29.29	4.10021	0.000340293	0.00977975	#N/A	#N/A	#N/A
QSF_SNX18.50.68	2.71983	0.00034223	0.00980326	SSTT_CAMJD Serine/threonine transporter SstT {ECO:0000255|HAMAP-Rule:MF_01582}	SSTT_CAMJD	sstT
QSF_ZBED4.4.7	3.85895	0.000342289	0.00980326	ZBED4_HUMAN Zinc finger BED domain-containing protein 4	ZBED4_HUMAN	ZBED4
QSF_HSP90B.2.6	-1.76258	0.000345765	0.0098858	HS90B_DANRE Heat shock protein HSP 90-beta	HS90B_DANRE	hsp90ab1
QSF_DESMB.1.1	4.89868	0.000346664	0.00989449	#N/A	#N/A	#N/A
QSF_VRK3.588.924	3.6076	0.000347625	0.00990494	TCB1_CAEBR Transposable element Tcb1 transposase	TCB1_CAEBR	#N/A
QSF_contig_033154	4.47014	0.000348274	0.00990645	#N/A	#N/A	#N/A
QSF_contig_020278	4.72864	0.000350472	0.00993966	#N/A	#N/A	#N/A
QSF_CG030.33.68	3.91574	0.000350636	0.00993966	#N/A	#N/A	#N/A
QSF_SPON2.55.112	3.08576	0.000352845	0.00998302	MED23_CAEEL Mediator of RNA polymerase II transcription subunit 23	MED23_CAEEL	sur-2
QSF_SLIP.3.3	4.23694	0.000353365	0.00998302	SLIP_HUMAN Nuclear GTPase SLIP-GC	SLIP_HUMAN	NUGGC
QSF_U119B.1.2	3.91009	0.000356431	0.0100526	U119B_DANRE Protein unc-119 homolog B	U119B_DANRE	unc119b
QSF_FLOT1.2.9	4.81409	0.000358129	0.0100834	PCKA_CALS4 Phosphoenolpyruvate carboxykinase [ATP] {ECO:0000255|HAMAP-Rule:MF_00453}	PCKA_CALS4	pckA
QSF_contig_051691	4.4229	0.000362435	0.0101874	VEGFC_MOUSE Vascular endothelial growth factor C	VEGFC_MOUSE	Vegfc
QSF_FKBP3.19.116	3.09198	0.000363897	0.0102112	TCB2_CAEBR Transposable element Tcb2 transposase	TCB2_CAEBR	#N/A
QSF_contig_036191	2.5164	0.000366383	0.010251	#N/A	#N/A	#N/A
QSF_ACSL4.19.57	4.66915	0.000366547	0.010251	DEN1B_HUMAN DENN domain-containing protein 1B	DEN1B_HUMAN	DENND1B
QSF_CLCC1.50.218	3.7332	0.000367876	0.0102709	TCB1_CAEBR Transposable element Tcb1 transposase	TCB1_CAEBR	#N/A
QSF_LOC100488659.64.66	3.31689	0.000368626	0.0102746	FBL83_ARATH Putative F-box/LRR-repeat protein At5g25860	FBL83_ARATH	At5g25860
QSF_LOC100843429.1.3	4.73302	0.000370922	0.0103213	TAR1_YEAST Protein TAR1	TAR1_YEAST	TAR1
QSF_LOC100316864.366.459	2.41953	0.000371657	0.0103215	TCB1_CAEBR Transposable element Tcb1 transposase	TCB1_CAEBR	#N/A
QSF_FKBP3.9.116	4.11544	0.00037217	0.0103215	TC1A_CAEEL Transposable element Tc1 transposase	TC1A_CAEEL	tc1a
QSF_contig_013317	3.876	0.000377022	0.0104227	#N/A	#N/A	#N/A
QSF_LOC101071826.2.2	2.14314	0.000377299	0.0104227	MIA3_HUMAN Melanoma inhibitory activity protein 3	MIA3_HUMAN	#N/A
QSF_contig_016440	4.05263	0.000377697	0.0104227	U18_HHV6U Putative immediate early glycoprotein	U18_HHV6U	U18
QSF_TMM43.28.138	2.16636	0.000378913	0.0104389	TC1A_CAEEL Transposable element Tc1 transposase	TC1A_CAEEL	tc1a
QSF_CLCC1.166.218	4.87046	0.00038122	0.0104759	TCB2_CAEBR Transposable element Tcb2 transposase	TCB2_CAEBR	#N/A
QSF_XPP3.3.5	2.77303	0.000381516	0.0104759	#N/A	#N/A	#N/A
QSF_contig_010354	2.14643	0.000382505	0.0104858	PA1B2_DROME Platelet-activating factor acetylhydrolase IB subunit beta homolog	PA1B2_DROME	Paf-AHalpha
QSF_contig_063479	2.49119	0.000384787	0.0105168	ATPB_NEUCR ATP synthase subunit beta, mitochondrial	ATPB_NEUCR	atp-2
QSF_contig_002271	5.08855	0.0003849	0.0105168	#N/A	#N/A	#N/A
QSF_ASPH.3.10	-5.57489	0.000387046	0.0105581	ASPH_HUMAN Aspartyl/asparaginyl beta-hydroxylase	ASPH_HUMAN	ASPH
QSF_PP2AA.87.445	4.19017	0.00038817	0.0105714	TCB2_CAEBR Transposable element Tcb2 transposase	TCB2_CAEBR	#N/A
QSF_LOC100575042.2.2	2.76524	0.000389236	0.010576	POL_BIV29 Gag-Pol polyprotein	POL_BIV29	gag-pol
QSF_LOC100695342.1.1	2.81257	0.000389608	0.010576	BT1A1_HUMAN Butyrophilin subfamily 1 member A1	BT1A1_HUMAN	BTN1A1
QSF_contig_054346	4.89076	0.000392006	0.0106237	#N/A	#N/A	#N/A
QSF_contig_018352	3.24718	0.000396229	0.0107088	Y138_METJA Putative glutamine amidotransferase-like protein MJ0138	Y138_METJA	MJ0138
QSF_LOC101165464.2.13	-4.21521	0.00039643	0.0107088	NLRC3_MOUSE Protein NLRC3	NLRC3_MOUSE	Nlrc3
QSF_contig_035294	4.56978	0.000398084	0.010736	MURC_BORA1 UDP-N-acetylmuramate--L-alanine ligase {ECO:0000255|HAMAP-Rule:MF_00046}	MURC_BORA1	murC
QSF_DNJC5.3.3	2.49601	0.000398898	0.0107406	BCAP_HUMAN Phosphoinositide 3-kinase adapter protein 1	BCAP_HUMAN	PIK3AP1
QSF_GP108.1.3	4.4486	0.000403097	0.0108361	GP108_HUMAN Protein GPR108	GP108_HUMAN	GPR108
QSF_LOC101169532.6.6	1.68413	0.00041011	0.0110068	RTJK_DROME RNA-directed DNA polymerase from mobile element jockey	RTJK_DROME	pol
QSF_contig_028247	4.22087	0.000415426	0.0111315	#N/A	#N/A	#N/A
QSF_E41L3.9.12	-4.83394	0.000421797	0.0112841	E41L3_MOUSE Band 4.1-like protein 3	E41L3_MOUSE	Epb41l3
QSF_TNR1A.1.3	2.28746	0.000425001	0.0113515	TCB1_CAEBR Transposable element Tcb1 transposase	TCB1_CAEBR	#N/A
QSF_LOC100488659.9.66	3.40288	0.000429622	0.0114566	GCH1L_BACSU GTP cyclohydrolase 1 type 2 homolog	GCH1L_BACSU	yqfO
QSF_GLO2.83.140	3.41249	0.000430374	0.0114583	TC1A_CAEEL Transposable element Tc1 transposase	TC1A_CAEEL	tc1a
QSF_DLG1L.1.2	-4.16206	0.000431024	1	DLG1L_DANRE Discs large homolog 1-like protein	DLG1L_DANRE	dlg1l
QSF_STXB.5.28	2.77887	0.000431118	0.0114597	STXB_SYNHO Stonustoxin subunit beta	STXB_SYNHO	#N/A
QSF_RL14.22.22	-5.10474	0.000433829	1	RL14_PIG 60S ribosomal protein L14	RL14_PIG	RPL14
QSF_TCRG1.3.3	-1.70865	0.000434348	0.0115272	TCRG1_MOUSE Transcription elongation regulator 1	TCRG1_MOUSE	Tcerg1
QSF_STXB.15.28	-4.41046	0.00043568	0.0115364	STXB_SYNHO Stonustoxin subunit beta	STXB_SYNHO	#N/A
QSF_contig_041963	4.04989	0.000436605	0.0115364	#N/A	#N/A	#N/A
QSF_contig_004770	2.41421	0.000436775	0.0115364	SRY_RAT Sex-determining region Y protein	SRY_RAT	Sry
QSF_contig_062131	4.67271	0.000439235	0.011583	#N/A	#N/A	#N/A
QSF_MYO9AL1.1.1	-5.3065	0.000441365	0.0116208	MYO9A_RAT Unconventional myosin-IXa	MYO9A_RAT	Myo9a
QSF_LOC101463797.2.2	2.78637	0.000447049	0.0117214	BRE1B_PONAB E3 ubiquitin-protein ligase BRE1B	BRE1B_PONAB	RNF40
QSF_TMM43.86.138	4.12921	0.000447487	0.0117214	TC1A_CAEEL Transposable element Tc1 transposase	TC1A_CAEEL	tc1a
QSF_FINTRIM.93.110	4.66744	0.000447821	0.0117214	LAT_MYCTU Probable L-lysine-epsilon aminotransferase	LAT_MYCTU	lat
QSF_contig_034827	2.453	0.000448748	0.0117214	#N/A	#N/A	#N/A
QSF_TIFA.4.87	1.97182	0.000449057	0.0117214	#N/A	#N/A	#N/A
QSF_EXOC5.6.24	3.75183	0.000449416	0.0117214	TCB1_CAEBR Transposable element Tcb1 transposase	TCB1_CAEBR	#N/A
QSF_LOC101076390.45.60	2.26993	0.000451731	0.0117634	TC1A_CAEEL Transposable element Tc1 transposase	TC1A_CAEEL	tc1a
QSF_FTCD.108.147	4.23779	0.000458703	0.0119263	KAE1B_METM7 Probable bifunctional tRNA threonylcarbamoyladenosine biosynthesis protein {ECO:0000255|HAMAP-Rule:MF_01447}	KAE1B_METM7	MmarC7_1414
QSF_INT8.13.36	3.6032	0.000465657	0.0120882	#N/A	#N/A	#N/A
QSF_VRK3.538.924	3.60735	0.000467395	0.0121144	TCB1_CAEBR Transposable element Tcb1 transposase	TCB1_CAEBR	#N/A
QSF_TM2D3.12.15	4.42251	0.000469021	0.0121376	#N/A	#N/A	#N/A
QSF_LOC101174551.1.1	1.46855	0.000469983	0.0121437	EKI2_HUMAN Ethanolamine kinase 2	EKI2_HUMAN	ETNK2
QSF_contig_019765	4.32802	0.000471262	0.0121578	#N/A	#N/A	#N/A
QSF_GAPDH.8.13	3.82001	0.000472629	0.0121682	G3P_COTJA Glyceraldehyde-3-phosphate dehydrogenase	G3P_COTJA	GAPDH
QSF_contig_036607	2.17832	0.000473125	0.0121682	#N/A	#N/A	#N/A
QSF_LRX1.1.4	4.07608	0.000475955	0.0122221	PALB2_MOUSE Partner and localizer of BRCA2	PALB2_MOUSE	Palb2
QSF_LOC100706917.1.2	-2.11341	0.000479824	0.0123024	SSRP1_CHICK FACT complex subunit SSRP1	SSRP1_CHICK	SSRP1
QSF_contig_051474	4.31279	0.000482826	0.0123604	RTJK_DROME RNA-directed DNA polymerase from mobile element jockey	RTJK_DROME	pol
QSF_GNDS.214.284	3.68579	0.000484024	0.012372	TCB2_CAEBR Transposable element Tcb2 transposase	TCB2_CAEBR	#N/A
QSF_contig_018228	2.31649	0.000487397	0.0124391	#N/A	#N/A	#N/A
QSF_ITPR3.1.3	-1.56874	0.000492156	0.0125413	ITPR3_MOUSE Inositol 1,4,5-trisphosphate receptor type 3	ITPR3_MOUSE	Itpr3
QSF_RS6.4.11	-3.91249	0.000492992	0.0125434	RS6_ONCMY 40S ribosomal protein S6	RS6_ONCMY	rps6
QSF_VRK3.876.924	2.68049	0.000494695	0.0125675	TCB1_CAEBR Transposable element Tcb1 transposase	TCB1_CAEBR	#N/A
QSF_LOC100699891.18.27	3.27982	0.00049685	0.0125852	TCB2_CAEBR Transposable element Tcb2 transposase	TCB2_CAEBR	#N/A
QSF_B2M.17.18	3.33361	0.000497419	0.0125852	TCAL3_HUMAN Transcription elongation factor A protein-like 3	TCAL3_HUMAN	TCEAL3
QSF_NEMVEDRAFT_V1G221296.4.4	4.08394	0.000497661	0.0125852	#N/A	#N/A	#N/A
QSF_VRK3.571.924	3.50714	0.000499537	0.0126135	TC3A_CAEEL Transposable element Tc3 transposase	TC3A_CAEEL	tc3a
QSF_VHL.19.27	2.85132	0.000501639	0.012643	#N/A	#N/A	#N/A
QSF_contig_039040	4.03932	0.000502364	0.012643	#N/A	#N/A	#N/A
QSF_ACOX1.15.39	4.13206	0.000502985	0.012643	TCB1_CAEBR Transposable element Tcb1 transposase	TCB1_CAEBR	#N/A
QSF_PALB2.1.2	-4.32829	0.000505263	0.0126646	PALB2_MOUSE Partner and localizer of BRCA2	PALB2_MOUSE	Palb2
QSF_UB2R2.7.42	2.73969	0.000505364	0.0126646	#N/A	#N/A	#N/A
QSF_LOC100194706.26.87	2.51541	0.000506988	0.0126861	TCB1_CAEBR Transposable element Tcb1 transposase	TCB1_CAEBR	#N/A
QSF_CLCC1.177.218	3.31505	0.000510624	0.0127579	CCNB2_XENLA G2/mitotic-specific cyclin-B2	CCNB2_XENLA	ccnb2
QSF_contig_011254	3.44871	0.000513245	0.0127597	#N/A	#N/A	#N/A
QSF_RAB31.113.298	2.27139	0.000513435	0.0127597	TC1A_CAEEL Transposable element Tc1 transposase	TC1A_CAEEL	tc1a
QSF_CLCC1.57.218	4.5248	0.000513532	0.0127597	YCF2_VITVI Protein Ycf2 {ECO:0000255|HAMAP-Rule:MF_01330}	YCF2_VITVI	ycf2-A
QSF_RAB31.82.298	4.13414	0.000513764	0.0127597	TC3A_CAEEL Transposable element Tc3 transposase	TC3A_CAEEL	tc3a
QSF_RN5S.1.1	1.44114	0.000515491	0.0127836	#N/A	#N/A	#N/A
QSF_HCD2.4.6	2.2087	0.000516894	0.0127993	VDAC1_SOLTU Mitochondrial outer membrane protein porin of 34 kDa	VDAC1_SOLTU	#N/A
QSF_TIFA.25.87	3.18465	0.000521282	0.0128888	RIFK_SULTO Riboflavin kinase {ECO:0000255|HAMAP-Rule:MF_01285}	RIFK_SULTO	ribK
QSF_contig_045606	2.73223	0.000522648	0.0129034	KIPK_ARATH Serine/threonine-protein kinase KIPK	KIPK_ARATH	#N/A
QSF_LOC101171194.1.1	4.22949	0.000523517	0.0129057	THTM_SCHPO Probable 3-mercaptopyruvate sulfurtransferase	THTM_SCHPO	tum1
QSF_RPL38.7.19	-4.30558	0.000525491	0.0129352	RL38_RAT 60S ribosomal protein L38	RL38_RAT	Rpl38
QSF_LOC100696005.4.4	-1.9663	0.000532555	0.0130897	PRC2A_MOUSE Protein PRRC2A	PRC2A_MOUSE	Prrc2a
QSF_contig_031524	3.88497	0.000533854	0.0131023	#N/A	#N/A	#N/A
QSF_ITPR3.2.3	-2.41278	0.000535367	0.01312	ITPR3_MOUSE Inositol 1,4,5-trisphosphate receptor type 3	ITPR3_MOUSE	Itpr3
QSF_HIRP3.20.29	3.33234	0.000541404	0.0132421	#N/A	#N/A	#N/A
QSF_LOC101078790.1.1	-1.49619	0.000541938	0.0132421	TGM5_HUMAN Protein-glutamine gamma-glutamyltransferase 5	TGM5_HUMAN	TGM5
QSF_RTJK.23.35	2.41398	0.000551643	0.0134594	RTJK_DROME RNA-directed DNA polymerase from mobile element jockey	RTJK_DROME	pol
QSF_ASAH2.1.1	2.74653	0.000555273	0.0135282	ASAH2_DANRE Neutral ceramidase	ASAH2_DANRE	asah2
QSF_TM163.61.72	2.76851	0.000559634	0.0136117	SFK1_YEAST Protein SFK1	SFK1_YEAST	SFK1
QSF_TMM43.130.138	5.04505	0.00056086	0.0136117	TC1A_CAEEL Transposable element Tc1 transposase	TC1A_CAEEL	tc1a
QSF_LOC100136182.239.349	2.3671	0.000561154	0.0136117	BAZ2B_HUMAN Bromodomain adjacent to zinc finger domain protein 2B	BAZ2B_HUMAN	BAZ2B
QSF_HRPX.5.7	4.24895	0.000566825	0.0137292	YPF17_PLAF7 Protein PF14_0175	YPF17_PLAF7	PF14_0175
QSF_contig_050045	1.86087	0.000571232	0.0138159	#N/A	#N/A	#N/A
QSF_contig_024593	4.46121	0.000572537	0.0138273	#N/A	#N/A	#N/A
QSF_LOC100333264.3.7	3.86305	0.000576011	0.0138911	STXA_SYNVE Neoverrucotoxin subunit alpha	STXA_SYNVE	#N/A
QSF_LOC101077013.1.1	2.04913	0.000578096	0.0139211	ITA3_BOVIN Integrin alpha-3	ITA3_BOVIN	ITGA3
QSF_LOC568500.1.5	2.75004	0.000581175	0.0139587	NRDC_MOUSE Nardilysin	NRDC_MOUSE	Nrdc
QSF_FINTRIM.29.110	4.64166	0.000581334	0.0139587	TRI29_MOUSE Tripartite motif-containing protein 29	TRI29_MOUSE	Trim29
QSF_contig_026329	3.74616	0.000586443	0.0140611	#N/A	#N/A	#N/A
QSF_CG050.10.16	3.5371	0.000587413	0.0140641	#N/A	#N/A	#N/A
QSF_ZGPAT.34.65	4.5805	0.000588587	0.014072	DAF31_CAEEL N-alpha-acetyltransferase daf-31 {ECO:0000305}	DAF31_CAEEL	daf-31
QSF_GNDS.9.284	3.06351	0.00059013	0.0140886	TC1A_CAEEL Transposable element Tc1 transposase	TC1A_CAEEL	tc1a
QSF_VRK3.482.924	4.10775	0.000592205	0.0140987	TCB1_CAEBR Transposable element Tcb1 transposase	TCB1_CAEBR	#N/A
QSF_LAC2.1.1	3.36745	0.000592249	0.0140987	LAC1_HUMAN Ig lambda-1 chain C regions	LAC1_HUMAN	#N/A
QSF_contig_062062	3.75265	0.000595197	0.0141487	#N/A	#N/A	#N/A
QSF_CG030.45.68	4.59775	0.000597579	0.0141819	#N/A	#N/A	#N/A
QSF_contig_052771	4.76374	0.000598297	0.0141819	#N/A	#N/A	#N/A
QSF_FKBP3.45.116	2.45896	0.000601639	0.0142408	TCB2_CAEBR Transposable element Tcb2 transposase	TCB2_CAEBR	#N/A
QSF_LOC101486632.2.2	-6.13639	0.00060466	1	LRRF2_HUMAN Leucine-rich repeat flightless-interacting protein 2	LRRF2_HUMAN	LRRFIP2
QSF_contig_024833	3.3113	0.000604951	0.014293	#N/A	#N/A	#N/A
QSF_LOC100699891.21.27	4.04981	0.000605563	0.014293	CD4_DELLE T-cell surface glycoprotein CD4	CD4_DELLE	CD4
QSF_LOC100699431.1.1	2.20544	0.000614733	0.0144889	HV303_HUMAN Ig heavy chain V-III region 23 {ECO:0000305}	HV303_HUMAN	#N/A
QSF_VIPR1.87.153	2.77039	0.000623478	0.0146742	RTJK_DROME RNA-directed DNA polymerase from mobile element jockey	RTJK_DROME	pol
QSF_CG057.198.247	4.62943	0.0006341	0.0149031	GDL48_ARATH GDSL esterase/lipase At2g42990	GDL48_ARATH	At2g42990
QSF_LOC100369689.1.1	4.2894	0.000643769	0.015109	GUF1_PLAF7 Translation factor GUF1 homolog, mitochondrial	GUF1_PLAF7	PFI0570w
QSF_PSAP.4.4	4.06865	0.000645055	0.0151179	SAP_BOVIN Prosaposin	SAP_BOVIN	PSAP
QSF_FA55C.88.197	3.39206	0.000647707	0.0151344	TCB2_CAEBR Transposable element Tcb2 transposase	TCB2_CAEBR	#N/A
QSF_PYGMA.2.10	-3.69286	0.00064819	0.0151344	PYGM_HUMAN Glycogen phosphorylase, muscle form	PYGM_HUMAN	PYGM
QSF_VRK3.758.924	3.48596	0.000648487	0.0151344	ISPE_STAAR 4-diphosphocytidyl-2-C-methyl-D-erythritol kinase {ECO:0000255|HAMAP-Rule:MF_00061}	ISPE_STAAR	SAR0496
QSF_ESRP1.1.1	1.0058	0.000652977	0.0152104	ESRP1_HUMAN Epithelial splicing regulatory protein 1	ESRP1_HUMAN	ESRP1
QSF_ERGI3.71.87	3.82159	0.000654581	0.0152104	TC1A_CAEEL Transposable element Tc1 transposase	TC1A_CAEEL	tc1a
QSF_CXCR3.18.55	2.18293	0.000655044	0.0152104	RTBS_DROME Probable RNA-directed DNA polymerase from transposon BS	RTBS_DROME	RTase
QSF_S26A2.73.83	4.15136	0.000656496	0.0152104	DCD_ARTCA Deoxycytidine triphosphate deaminase {ECO:0000255|HAMAP-Rule:MF_00146}	DCD_ARTCA	#N/A
QSF_LOC100135874.3.8	3.23826	0.000657215	0.0152104	#N/A	#N/A	#N/A
QSF_contig_036668	4.61973	0.00065723	0.0152104	ADNP2_HUMAN ADNP homeobox protein 2	ADNP2_HUMAN	ADNP2
QSF_VRK3.594.924	3.85586	0.000658273	0.0152131	TCB1_CAEBR Transposable element Tcb1 transposase	TCB1_CAEBR	#N/A
QSF_UBIQP.8.10	-1.81616	0.000659174	0.0152131	UBIQP_XENLA Polyubiquitin	UBIQP_XENLA	#N/A
QSF_UB2R2.32.42	3.76232	0.000663177	0.0152833	#N/A	#N/A	#N/A
QSF_contig_010345	4.39646	0.000664053	0.0152833	#N/A	#N/A	#N/A
QSF_SPD2B.8.48	3.26047	0.000673052	0.015469	#N/A	#N/A	#N/A
QSF_TMM43.36.138	3.4366	0.000675017	0.0154928	TC1A_CAEEL Transposable element Tc1 transposase	TC1A_CAEEL	tc1a
QSF_LOC100136182.68.349	3.2774	0.000675974	0.0154934	PLCE1_MOUSE 1-phosphatidylinositol 4,5-bisphosphate phosphodiesterase epsilon-1	PLCE1_MOUSE	Plce1
QSF_KIF21A.2.4	2.20784	0.000677524	0.0155076	KI21A_HUMAN Kinesin-like protein KIF21A	KI21A_HUMAN	KIF21A
QSF_contig_022886	4.337	0.00067856	0.0155099	#N/A	#N/A	#N/A
QSF_COMD4.4.6	2.97719	0.00068229	0.0155738	#N/A	#N/A	#N/A
QSF_ADSSL1.2.25	3.77895	0.00068627	0.0156432	ATPG_NOCSJ ATP synthase gamma chain {ECO:0000255|HAMAP-Rule:MF_00815}	ATPG_NOCSJ	atpG
QSF_contig_061526	4.40612	0.000689696	0.0156998	#N/A	#N/A	#N/A
QSF_YO84.97.131	1.59635	0.000692055	0.015732	#N/A	#N/A	#N/A
QSF_contig_007725	2.6465	0.000695963	0.0157992	#N/A	#N/A	#N/A
QSF_LOC100316864.185.459	2.6862	0.000697878	0.0158211	TC1A_CAEEL Transposable element Tc1 transposase	TC1A_CAEEL	tc1a
QSF_UB2R2.14.42	4.23464	0.000700267	0.0158422	TC1A_CAEEL Transposable element Tc1 transposase	TC1A_CAEEL	tc1a
QSF_CANX.3.5	-1.52686	0.000700713	0.0158422	CALX_RAT Calnexin	CALX_RAT	Canx
QSF_GNDS.267.284	3.03525	0.000701764	0.0158444	TCB1_CAEBR Transposable element Tcb1 transposase	TCB1_CAEBR	#N/A
QSF_contig_020277	-3.49723	0.0007031	0.0158531	VPS10_ASPTN Vacuolar protein sorting/targeting protein 10	VPS10_ASPTN	vps10
QSF_RS6.5.11	-2.06242	0.000706383	0.0159043	RS6_ONCMY 40S ribosomal protein S6	RS6_ONCMY	rps6
QSF_contig_029187	4.65151	0.000707566	0.0159043	ILVD_STRT2 Dihydroxy-acid dehydratase {ECO:0000255|HAMAP-Rule:MF_00012}	ILVD_STRT2	ilvD
QSF_ALG13.2.69	3.96109	0.000708237	0.0159043	TC1A_CAEEL Transposable element Tc1 transposase	TC1A_CAEEL	tc1a
QSF_MK13.2.4	2.45011	0.000713767	0.0160069	#N/A	#N/A	#N/A
QSF_LIPS.118.170	2.37948	0.00071495	0.0160118	#N/A	#N/A	#N/A
QSF_RL4A.7.22	-2.57027	0.000719205	0.0160828	RL4B_XENLA 60S ribosomal protein L4-B	RL4B_XENLA	rpl4-b
QSF_contig_058824	4.01386	0.000720055	0.0160828	#N/A	#N/A	#N/A
QSF_contig_061029	2.01184	0.000726179	0.0161883	#N/A	#N/A	#N/A
QSF_FTCD.35.147	3.12174	0.000726722	0.0161883	TC1A_CAEEL Transposable element Tc1 transposase	TC1A_CAEEL	tc1a
QSF_RN7SK.1.1	-1.36239	0.000730404	0.0162274	ABCC5_DICDI ABC transporter C family member 5	ABCC5_DICDI	abcC5
QSF_LOC101473092.2.2	2.40495	0.000730428	0.0162274	DUS7_HUMAN Dual specificity protein phosphatase 7	DUS7_HUMAN	DUSP7
QSF_PR15B.1.2	-2.59094	0.00073553	0.016319	PR15B_MOUSE Protein phosphatase 1 regulatory subunit 15B	PR15B_MOUSE	Ppp1r15b
QSF_LOC101481096.54.61	3.02644	0.000738042	0.0163529	TCB2_CAEBR Transposable element Tcb2 transposase	TCB2_CAEBR	#N/A
QSF_CLCC1.11.218	3.7372	0.000743816	0.016455	ATPA_NITSB ATP synthase subunit alpha {ECO:0000255|HAMAP-Rule:MF_01346}	ATPA_NITSB	atpA
QSF_DNAS1.1.1	3.25059	0.000744629	0.016455	DNAS1_BOVIN Deoxyribonuclease-1	DNAS1_BOVIN	DNASE1
QSF_LONF2.1.1	3.31182	0.000746515	0.0164649	LONF2_HUMAN LON peptidase N-terminal domain and RING finger protein 2	LONF2_HUMAN	LONRF2
QSF_LOC100423584.1.2	3.53095	0.000747055	0.0164649	COX3_SALSA Cytochrome c oxidase subunit 3	COX3_SALSA	mt-co3
QSF_contig_028800	1.94604	0.00074884	0.0164824	#N/A	#N/A	#N/A
QSF_LOC100136283.1.6	-6.35502	0.000752518	1	ICAL_MOUSE Calpastatin	ICAL_MOUSE	Cast
QSF_contig_036361	4.50496	0.000755612	0.0166095	CILA_HAEIN Citrate lyase alpha chain	CILA_HAEIN	citF
QSF_LOC101470101.49.58	2.85955	0.000759851	0.0166806	TC1A_CAEEL Transposable element Tc1 transposase	TC1A_CAEEL	tc1a
QSF_WU_FJ05H12.2.2	3.99633	0.000767567	0.0168085	#N/A	#N/A	#N/A
QSF_contig_019220	4.41012	0.000768527	0.0168085	DTPB_PHOAA Dipeptide and tripeptide permease B {ECO:0000255|HAMAP-Rule:MF_01879}	DTPB_PHOAA	dtpB
QSF_contig_054878	4.58159	0.000769366	0.0168085	DOPR4_CAEEL Dopamine receptor 4	DOPR4_CAEEL	dop-4
QSF_VIPR1.120.153	2.01928	0.000769714	0.0168085	RTJK_DROFU RNA-directed DNA polymerase from mobile element jockey	RTJK_DROFU	jockey\pol
QSF_LOC100369671.1.3	3.95597	0.000771289	0.0168208	RTBS_DROME Probable RNA-directed DNA polymerase from transposon BS	RTBS_DROME	RTase
QSF_LOC101481096.2.61	3.86982	0.000775448	0.0168783	MEND_SYNS9 2-succinyl-5-enolpyruvyl-6-hydroxy-3-cyclohexene-1-carboxylate synthase {ECO:0000255|HAMAP-Rule:MF_01659}	MEND_SYNS9	menD
QSF_FTCD.60.147	3.4768	0.000775954	0.0168783	F187A_RAT Ig-like V-type domain-containing protein FAM187A	F187A_RAT	Fam187a
QSF_CAR8.59.61	3.21758	0.000787343	0.0170696	#N/A	#N/A	#N/A
QSF_contig_008791	3.75324	0.000787642	0.0170696	#N/A	#N/A	#N/A
QSF_CACO1.2.7	4.50352	0.000787826	0.0170696	PDAT2_ARATH Putative phospholipid:diacylglycerol acyltransferase 2	PDAT2_ARATH	PDAT2
QSF_VRK3.562.924	4.49382	0.00079138	0.0171227	TCB1_CAEBR Transposable element Tcb1 transposase	TCB1_CAEBR	#N/A
QSF_CNPY4.226.306	4.12731	0.000792337	0.0171227	#N/A	#N/A	#N/A
QSF_contig_036673	4.41451	0.000796228	0.0171845	CD2_MACFA T-cell surface antigen CD2	CD2_MACFA	CD2
QSF_ARL15.25.116	3.41058	0.000797371	0.0171869	#N/A	#N/A	#N/A
QSF_VRK3.386.924	3.35125	0.00080043	0.0172206	TC1A_CAEEL Transposable element Tc1 transposase	TC1A_CAEEL	tc1a
QSF_LOC101468763.2.3	-3.3982	0.0008015	0.0172206	MA7D2_HUMAN MAP7 domain-containing protein 2	MA7D2_HUMAN	MAP7D2
QSF_RASF2.30.46	2.51931	0.000802041	0.0172206	#N/A	#N/A	#N/A
QSF_LOC100709214.4.4	-5.17384	0.000809108	1	RPGP2_MOUSE Rap1 GTPase-activating protein 2	RPGP2_MOUSE	Rap1gap2
QSF_RTJK.20.35	2.26994	0.000812199	0.0174162	RTBS_DROME Probable RNA-directed DNA polymerase from transposon BS	RTBS_DROME	RTase
QSF_PPIP1.1.1	3.18427	0.000816675	0.0174623	PPIP1_MOUSE Proline-serine-threonine phosphatase-interacting protein 1	PPIP1_MOUSE	Pstpip1
QSF_PL8L1.2.6	4.81769	0.000817222	0.0174623	PL8L1_MOUSE PLAC8-like protein 1	PL8L1_MOUSE	Plac8l1
QSF_contig_063554	4.91502	0.000817496	0.0174623	#N/A	#N/A	#N/A
QSF_LOC100136387.15.42	4.44504	0.000822032	0.0175367	HIS4_AERHH 1-(5-phosphoribosyl)-5-[(5-phosphoribosylamino)methylideneamino] imidazole-4-carboxamide isomerase {ECO:0000255|HAMAP-Rule:MF_01014}	HIS4_AERHH	hisA
QSF_VRK3.360.924	3.28192	0.000824372	0.0175423	TCB1_CAEBR Transposable element Tcb1 transposase	TCB1_CAEBR	#N/A
QSF_MAPK3.2.3	4.72461	0.000824402	0.0175423	#N/A	#N/A	#N/A
QSF_CA2D4.2.2	2.84692	0.00083427	0.0177231	CA2D4_MOUSE Voltage-dependent calcium channel subunit alpha-2/delta-4	CA2D4_MOUSE	Cacna2d4
QSF_FTCD.129.147	2.09157	0.000835029	0.0177231	#N/A	#N/A	#N/A
QSF_RAB31.74.298	1.97609	0.000846794	0.0179284	TCB1_CAEBR Transposable element Tcb1 transposase	TCB1_CAEBR	#N/A
QSF_contig_019626	1.70422	0.00084786	0.0179284	#N/A	#N/A	#N/A
QSF_SPON2.38.112	3.58368	0.000847934	0.0179284	GMHA_WOLSU Phosphoheptose isomerase {ECO:0000255|HAMAP-Rule:MF_00067}	GMHA_WOLSU	gmhA
QSF_LOC101481855.1.1	-2.36293	0.000850189	0.0179532	IER2_DANRE Immediate early response gene 2 protein	IER2_DANRE	ier2
QSF_LDB3L.1.11	3.45845	0.000857609	0.018087	LDB3_MOUSE LIM domain-binding protein 3	LDB3_MOUSE	Ldb3
QSF_SNN.14.28	4.31739	0.000859622	0.0181065	#N/A	#N/A	#N/A
QSF_contig_025963	2.78693	0.000868171	0.0182634	#N/A	#N/A	#N/A
QSF_XAUT_3687.1.1	3.51262	0.00087075	0.0182719	SSPH2_SALTY E3 ubiquitin-protein ligase sspH2	SSPH2_SALTY	sspH2
QSF_SPD2B.48.48	4.04014	0.000871309	0.0182719	TOP1_RICTY DNA topoisomerase 1 {ECO:0000255|HAMAP-Rule:MF_00952}	TOP1_RICTY	topA
QSF_contig_060036	3.04101	0.000872335	0.0182719	FXRD2_DANRE FAD-dependent oxidoreductase domain-containing protein 2	FXRD2_DANRE	foxred2
QSF_CRBL2.27.80	3.63245	0.000872965	0.0182719	#N/A	#N/A	#N/A
QSF_REEP3.6.21	4.0408	0.000877188	0.0183372	CF015_PANTR Uncharacterized protein C6orf15 homolog	CF015_PANTR	STG
QSF_LOC101078388.1.15	2.33868	0.000878521	0.018342	SCND3_HUMAN SCAN domain-containing protein 3	SCND3_HUMAN	ZBED9
QSF_RL9.6.13	-2.49884	0.000884551	0.0184448	RL9_ICTPU 60S ribosomal protein L9	RL9_ICTPU	rpl9
QSF_PP2AA.151.445	2.57162	0.000892553	0.0185883	TC1A_CAEEL Transposable element Tc1 transposase	TC1A_CAEEL	tc1a
QSF_LOC100330275.4.4	2.756	0.000894343	0.0186023	Y558_CHLT3 UPF0234 protein Ctha_0558 {ECO:0000255|HAMAP-Rule:MF_00632}	Y558_CHLT3	Ctha_0558
QSF_contig_045858	4.13699	0.000898783	0.0186489	#N/A	#N/A	#N/A
QSF_CLCC1.174.218	3.65153	0.000898823	0.0186489	Y1255_LISIN Uncharacterized protein Lin1255/Lin1742	Y1255_LISIN	lin1255
QSF_LOC100316864.451.459	3.97541	0.00090059	0.0186623	TCB2_CAEBR Transposable element Tcb2 transposase	TCB2_CAEBR	#N/A
QSF_PRSR2.1.3	-6.67511	0.000902468	0.0186779	PRSR2_MOUSE Proline and serine-rich protein 2	PRSR2_MOUSE	Proser2
QSF_CANB1.1.1	3.11759	0.000906744	0.0187431	CANB1_RAT Calcineurin subunit B type 1	CANB1_RAT	Ppp3r1
QSF_LOC100316864.368.459	3.64219	0.000913114	0.0188407	TC1A_CAEEL Transposable element Tc1 transposase	TC1A_CAEEL	tc1a
QSF_PP2AA.334.445	3.91296	0.000913728	0.0188407	TC1A_CAEEL Transposable element Tc1 transposase	TC1A_CAEEL	tc1a
QSF_GNDS.13.284	3.48602	0.000919242	0.0189309	TCB1_CAEBR Transposable element Tcb1 transposase	TCB1_CAEBR	#N/A
QSF_Y1058.2.2	3.77408	0.00092772	0.0190819	LICA2_HAEIF Protein LicA	LICA2_HAEIF	licA
QSF_LOC101076390.51.60	3.78816	0.000930859	0.0191228	TCB2_CAEBR Transposable element Tcb2 transposase	TCB2_CAEBR	#N/A
QSF_contig_006711	3.16093	0.000932185	0.0191265	#N/A	#N/A	#N/A
QSF_CLCC1.37.218	2.75661	0.000934181	0.0191438	MIAA_MYCGA tRNA dimethylallyltransferase {ECO:0000255|HAMAP-Rule:MF_00185}	MIAA_MYCGA	miaA
QSF_LOC100202983.15.27	3.8794	0.000939369	0.0192264	TC1A_CAEEL Transposable element Tc1 transposase	TC1A_CAEEL	tc1a
QSF_LOC101482465.1.3	3.51367	0.000941535	0.0192471	CH602_SALRD 60 kDa chaperonin 2 {ECO:0000255|HAMAP-Rule:MF_00600}	CH602_SALRD	groL2
QSF_UB2R2.19.42	2.24383	0.000942825	0.0192498	#N/A	#N/A	#N/A
QSF_RTBS.37.42	1.47751	0.000955127	0.0194771	RTBS_DROME Probable RNA-directed DNA polymerase from transposon BS	RTBS_DROME	RTase
QSF_FKBP3.73.116	4.28631	0.000960126	0.0195551	CYB5_PIG Cytochrome b5	CYB5_PIG	CYB5A
QSF_C1QC.3.3	3.21385	0.000965787	0.0196463	C1QC_RAT Complement C1q subcomponent subunit C	C1QC_RAT	C1qc
QSF_CAGL0E06688G.1.1	3.02856	0.000969767	0.019699	FA5_HUMAN Coagulation factor V	FA5_HUMAN	F5
QSF_APOA2.3.10	-8.75464	0.000971007	0.019699	#N/A	#N/A	#N/A
QSF_SLC27A6.1.1	3.43914	0.000972552	0.019699	S27A6_HUMAN Long-chain fatty acid transport protein 6	S27A6_HUMAN	SLC27A6
QSF_ITM2A.4.7	2.79914	0.000973114	0.019699	#N/A	#N/A	#N/A
QSF_LOC100491224.12.21	1.61137	0.000974427	0.0197017	RTJK_DROME RNA-directed DNA polymerase from mobile element jockey	RTJK_DROME	pol
QSF_CG030.37.68	2.70666	0.000979027	0.0197706	YR554_MIMIV Uncharacterized protein R554	YR554_MIMIV	MIMI_R554
QSF_FINTRIM.52.110	3.64139	0.000980511	0.0197766	TRI25_MOUSE E3 ubiquitin/ISG15 ligase TRIM25	TRI25_MOUSE	Trim25
QSF_CRE_08695.1.1	1.81197	0.000982655	0.0197959	RTXE_DROME Probable RNA-directed DNA polymerase from transposon X-element	RTXE_DROME	X-element\ORF2
QSF_SLAP1.7.7	-2.3661	0.000993145	0.0199729	OGFR_MOUSE Opioid growth factor receptor	OGFR_MOUSE	Ogfr
QSF_RASF2.38.46	2.50404	0.000993843	0.0199729	TRUD_METTH Probable tRNA pseudouridine synthase D {ECO:0000255|HAMAP-Rule:MF_01082}	TRUD_METTH	truD
QSF_contig_036865	3.55395	0.000999778	0.0200543	AHNK_HUMAN Neuroblast differentiation-associated protein AHNAK	AHNK_HUMAN	AHNAK
QSF_TNIK.7.8	-1.28845	0.0010003	0.0200543	TNIK_MOUSE Traf2 and NCK-interacting protein kinase	TNIK_MOUSE	Tnik
QSF_CLCC1.91.218	2.29036	0.00100245	0.0200731	TCB1_CAEBR Transposable element Tcb1 transposase	TCB1_CAEBR	#N/A
QSF_LOC101165464.7.13	3.1357	0.00100504	0.0200738	ART2_YEAST Putative uncharacterized protein ART2	ART2_YEAST	ART2
QSF_contig_059058	-3.92808	0.00100532	0.0200738	CAPSD_BPPHS Capsid protein F	CAPSD_BPPHS	F
QSF_GNAS.1.2	1.9051	0.0010061	0.0200738	GNAS_CRIGR Guanine nucleotide-binding protein G(s) subunit alpha	GNAS_CRIGR	GNAS
QSF_GPR18.9.35	3.89915	0.00100803	0.0200882	CMKMT_XENLA Calmodulin-lysine N-methyltransferase	CMKMT_XENLA	camkmt
QSF_VRK3.614.924	3.27323	0.0010158	0.0202154	TCB1_CAEBR Transposable element Tcb1 transposase	TCB1_CAEBR	#N/A
QSF_PRC2B.1.2	-1.19795	0.00101684	0.0202154	PRC2B_HUMAN Protein PRRC2B	PRC2B_HUMAN	PRRC2B
QSF_LOC101453281.2.2	2.08465	0.00102665	0.020386	#N/A	#N/A	#N/A
QSF_CP3AR.9.11	3.74022	0.00102989	0.020426	CP3AR_ONCMY Cytochrome P450 3A27	CP3AR_ONCMY	cyp3a27
QSF_VRK3.875.924	4.31278	0.00103632	0.0205289	TCB1_CAEBR Transposable element Tcb1 transposase	TCB1_CAEBR	#N/A
QSF_CRE_04257.1.1	1.47108	0.0010397	0.0205714	RTBS_DROME Probable RNA-directed DNA polymerase from transposon BS	RTBS_DROME	RTase
QSF_TCOF.2.5	-5.26193	0.00104176	1	TCOF_HUMAN Treacle protein	TCOF_HUMAN	TCOF1
QSF_VPS29.12.12	2.85231	0.00104395	0.020631	PANCY_PROM0 Bifunctional pantoate ligase/cytidylate kinase {ECO:0000255|HAMAP-Rule:MF_01349}	PANCY_PROM0	panC/cmk
QSF_XFIN.69.90	-2.61431	0.00104669	0.0206588	#N/A	#N/A	#N/A
QSF_LOC101174167.1.1	4.55017	0.00104784	0.0206588	RN128_HUMAN E3 ubiquitin-protein ligase RNF128	RN128_HUMAN	RNF128
QSF_EIF5.2.2	-1.54453	0.00105728	0.0208202	IF5_HUMAN Eukaryotic translation initiation factor 5	IF5_HUMAN	EIF5
QSF_FA55C.43.197	4.4462	0.0010621	0.0208749	TCB2_CAEBR Transposable element Tcb2 transposase	TCB2_CAEBR	#N/A
QSF_B2MG.10.21	4.23127	0.00106263	0.0208749	B2MG_ICTPU Beta-2-microglobulin	B2MG_ICTPU	b2m
QSF_LOC100701241.1.1	3.11434	0.00106382	0.0208749	RET2_RAT Retinol-binding protein 2	RET2_RAT	Rbp2
QSF_LOC100699891.1.27	3.129	0.00106858	0.0209436	ZN106_MOUSE Zinc finger protein 106	ZN106_MOUSE	Znf106
QSF_contig_069251	2.34743	0.00107089	0.0209643	#N/A	#N/A	#N/A
QSF_contig_044524	1.69471	0.00107329	0.0209866	#N/A	#N/A	#N/A
QSF_contig_007527	3.12971	0.00107473	0.0209901	#N/A	#N/A	#N/A
QSF_GBG12.43.53	4.43972	0.00107849	0.0210389	TCB1_CAEBR Transposable element Tcb1 transposase	TCB1_CAEBR	#N/A
QSF_contig_004543	-2.52095	0.00108455	0.0211323	#N/A	#N/A	#N/A
QSF_RAB31.92.298	4.39827	0.00108809	0.0211506	TC3A_CAEEL Transposable element Tc3 transposase	TC3A_CAEEL	tc3a
QSF_VIPR1.116.153	1.58441	0.00108891	0.0211506	RTJK_DROFU RNA-directed DNA polymerase from mobile element jockey	RTJK_DROFU	jockey\pol
QSF_LOC100202983.9.27	4.3939	0.0010906	0.0211506	TCB1_CAEBR Transposable element Tcb1 transposase	TCB1_CAEBR	#N/A
QSF_contig_062701	3.86603	0.001092	0.0211506	ATPG_LACDB ATP synthase gamma chain {ECO:0000255|HAMAP-Rule:MF_00815}	ATPG_LACDB	atpG
QSF_LOC101071731.2.3	3.48358	0.00109244	0.0211506	PBIP1_MOUSE Pre-B-cell leukemia transcription factor-interacting protein 1	PBIP1_MOUSE	Pbxip1
QSF_LOC100694569.1.1	-1.84361	0.00109312	0.0211506	H2B_SALTR Histone H2B	H2B_SALTR	#N/A
QSF_contig_017311	2.02788	0.0010948	0.0211584	#N/A	#N/A	#N/A
QSF_CRE_23222.1.1	2.51124	0.00109725	0.0211812	RTBS_DROME Probable RNA-directed DNA polymerase from transposon BS	RTBS_DROME	RTase
QSF_contig_019594	2.83588	0.00110873	0.0213781	#N/A	#N/A	#N/A
QSF_contig_056894	0.838132	0.00111546	0.0214829	#N/A	#N/A	#N/A
QSF_ZN313.10.16	2.7966	0.00113212	0.0217786	ZNT9_XENLA Zinc transporter 9	ZNT9_XENLA	slc30a9
QSF_LOC100699117.1.1	2.21802	0.00114233	0.0219495	CXAR_DANRE Coxsackievirus and adenovirus receptor homolog	CXAR_DANRE	cxadr
QSF_FA55C.171.197	2.27423	0.001146	0.0219947	TC1A_CAEEL Transposable element Tc1 transposase	TC1A_CAEEL	tc1a
QSF_GBG12.17.53	3.01242	0.00116061	0.0222496	#N/A	#N/A	#N/A
QSF_AGR2.6.7	-5.74368	0.00116415	0.0222717	AGR2_DANRE Anterior gradient protein 2 homolog	AGR2_DANRE	agr2
QSF_contig_061870	1.902	0.00116475	0.0222717	#N/A	#N/A	#N/A
QSF_VRK3.565.924	1.76342	0.00116578	0.0222717	TCB1_CAEBR Transposable element Tcb1 transposase	TCB1_CAEBR	#N/A
QSF_UB2R2.31.42	2.24651	0.00117089	0.0223436	GAD_SULSO D-gluconate/D-galactonate dehydratase {ECO:0000303|PubMed:15474024}	GAD_SULSO	#N/A
QSF_CRBL2.55.80	3.0621	0.00117586	0.0224127	#N/A	#N/A	#N/A
QSF_VRK3.872.924	2.3925	0.00118311	0.0225251	TC1A_CAEEL Transposable element Tc1 transposase	TC1A_CAEEL	tc1a
QSF_LOC101480384.2.2	3.07686	0.00118531	0.0225412	T53I1_HUMAN Tumor protein p53-inducible nuclear protein 1	T53I1_HUMAN	TP53INP1
QSF_SCLY.10.19	4.25926	0.00119598	0.0227182	RTBS_DROME Probable RNA-directed DNA polymerase from transposon BS	RTBS_DROME	RTase
QSF_LOC100488659.28.66	1.22214	0.00120569	0.0228765	GATD_METMA Glutamyl-tRNA(Gln) amidotransferase subunit D {ECO:0000255|HAMAP-Rule:MF_00586}	GATD_METMA	gatD
QSF_MIA3.6.7	3.28818	0.00121466	0.0230205	MIA3_MOUSE Melanoma inhibitory activity protein 3	MIA3_MOUSE	#N/A
QSF_NR3C1.8.9	1.81548	0.00121605	0.0230206	GCR_ONCMY Glucocorticoid receptor	GCR_ONCMY	nr3c1
QSF_PEAM3.10.42	3.52489	0.0012236	0.0231266	TCB1_CAEBR Transposable element Tcb1 transposase	TCB1_CAEBR	#N/A
QSF_LT4R2.1.1	4.13827	0.00122443	0.0231266	LT4R2_HUMAN Leukotriene B4 receptor 2	LT4R2_HUMAN	LTB4R2
QSF_contig_025741	4.16189	0.00122854	0.0231592	TTN1_CAEEL Titin homolog {ECO:0000303|PubMed:12381307}	TTN1_CAEEL	ttn-1
QSF_BRAFLDRAFT_97136.1.1	-1.4974	0.00122894	0.0231592	RN186_HUMAN RING finger protein 186	RN186_HUMAN	RNF186
QSF_GNDS.150.284	3.81576	0.00123422	0.0232324	TC1A_CAEEL Transposable element Tc1 transposase	TC1A_CAEEL	tc1a
QSF_GNDS.254.284	2.85312	0.00124248	0.023345	TC1A_CAEEL Transposable element Tc1 transposase	TC1A_CAEEL	tc1a
QSF_LOC755724.2.2	2.06581	0.00124301	0.023345	#N/A	#N/A	#N/A
QSF_contig_068554	3.31039	0.00124764	0.0234056	#N/A	#N/A	#N/A
QSF_LOC100700259.15.19	3.70041	0.00125176	0.0234565	STXB_SYNHO Stonustoxin subunit beta	STXB_SYNHO	#N/A
QSF_LOC100698012.1.2	1.8457	0.00125571	0.023504	GIMA4_HUMAN GTPase IMAP family member 4	GIMA4_HUMAN	GIMAP4
QSF_LOC100712362.1.1	3.65883	0.00126209	0.0235968	PARVG_HUMAN Gamma-parvin	PARVG_HUMAN	PARVG
QSF_LOC100706494.1.1	-4.35014	0.00126889	0.0236973	IFFO1_HUMAN Intermediate filament family orphan 1	IFFO1_HUMAN	IFFO1
QSF_contig_019870	2.59853	0.00127486	0.0237822	#N/A	#N/A	#N/A
QSF_AATM.2.3	3.12189	0.00127775	0.0238093	AATM_MOUSE Aspartate aminotransferase, mitochondrial	AATM_MOUSE	Got2
QSF_FINTRIM.11.110	3.20481	0.00128381	0.0238956	CAHZ_DANRE Carbonic anhydrase	CAHZ_DANRE	cahz
QSF_contig_046541	4.12446	0.00128891	0.0239636	SYM_PSEMY Methionine--tRNA ligase {ECO:0000255|HAMAP-Rule:MF_00098}	SYM_PSEMY	metG
QSF_SPD2B.16.48	2.45271	0.00129116	0.0239738	SYNE1_HUMAN Nesprin-1	SYNE1_HUMAN	SYNE1
QSF_FINTRIM.110.110	-2.10188	0.00129234	0.0239738	TR16L_HUMAN Tripartite motif-containing protein 16-like protein	TR16L_HUMAN	TRIM16L
QSF_VRK3.348.924	3.39407	0.00129485	0.0239937	TCB1_CAEBR Transposable element Tcb1 transposase	TCB1_CAEBR	#N/A
QSF_CATS.1.7	4.35561	0.00129746	0.0240152	CRUST_PANBO Crustapain	CRUST_PANBO	Cys
QSF_contig_042708	4.14819	0.00131173	0.0242512	PDXA_AROAE 4-hydroxythreonine-4-phosphate dehydrogenase {ECO:0000255|HAMAP-Rule:MF_00536}	PDXA_AROAE	pdxA
QSF_LOC100891574.3.3	1.42597	0.00131312	0.0242512	RTJK_DROFU RNA-directed DNA polymerase from mobile element jockey	RTJK_DROFU	jockey\pol
QSF_CLCC1.14.218	4.00743	0.00131674	0.024291	PSF1_CAEEL Probable DNA replication complex GINS protein PSF1	PSF1_CAEEL	psf-1
QSF_contig_008701	4.05706	0.00131865	0.0242977	#N/A	#N/A	#N/A
QSF_LOC100194706.60.87	2.82452	0.00132014	0.0242977	TCB1_CAEBR Transposable element Tcb1 transposase	TCB1_CAEBR	#N/A
QSF_contig_030632	1.88616	0.00132148	0.0242977	PA2GE_MOUSE Group IIE secretory phospholipase A2	PA2GE_MOUSE	Pla2g2e
QSF_EBF3.2.3	4.43091	0.00132668	0.0243128	#N/A	#N/A	#N/A
QSF_LOC101467001.1.1	2.20637	0.00132759	0.0243128	#N/A	#N/A	#N/A
QSF_SPD2B.30.48	2.58641	0.00132866	0.0243128	#N/A	#N/A	#N/A
QSF_TMM27.14.33	3.60668	0.00132953	0.0243128	#N/A	#N/A	#N/A
QSF_LOC101481096.31.61	3.00261	0.00132961	0.0243128	TRM1_METM7 tRNA (guanine(26)-N(2))-dimethyltransferase {ECO:0000255|HAMAP-Rule:MF_00290}	TRM1_METM7	trm1
QSF_BAFB.58.89	2.16586	0.00133205	0.0243308	PDXT_TROWT Pyridoxal 5'-phosphate synthase subunit PdxT {ECO:0000255|HAMAP-Rule:MF_01615}	PDXT_TROWT	pdxT
QSF_SNX18.19.68	3.42209	0.00133361	0.0243325	RL5_MAGSA 50S ribosomal protein L5 {ECO:0000255|HAMAP-Rule:MF_01333}	RL5_MAGSA	rplE
QSF_POU2F3.1.1	-2.30806	0.00133521	0.0243351	PO2F3_RAT POU domain, class 2, transcription factor 3	PO2F3_RAT	Pou2f3
QSF_TMC7.10.32	2.54673	0.0013384	0.0243417	Y380_BACCJ Putative Gly-rich membrane protein Bcell_0380	Y380_BACCJ	Bcell_0380
QSF_CLCC1.125.218	2.3655	0.00133893	0.0243417	TCB2_CAEBR Transposable element Tcb2 transposase	TCB2_CAEBR	#N/A
QSF_LOC100194629.6.8	2.32224	0.00133996	0.0243417	#N/A	#N/A	#N/A
QSF_LOC100194706.3.87	1.9814	0.00135238	0.0245352	TCB1_CAEBR Transposable element Tcb1 transposase	TCB1_CAEBR	#N/A
QSF_PTPRR.1.1	3.93074	0.00135472	0.0245352	PTPRR_MOUSE Receptor-type tyrosine-protein phosphatase R	PTPRR_MOUSE	Ptprr
QSF_LOC100136448.1.2	3.96155	0.00135544	0.0245352	LECM4_PSEPL C-type lectin lectoxin-Enh4	LECM4_PSEPL	#N/A
QSF_ANGT.12.50	2.01044	0.00135652	0.0245352	CR3CA_BACTK Pesticidal crystal protein Cry3Ca	CR3CA_BACTK	cry3Ca
QSF_contig_062317	2.00284	0.00136125	0.0245693	#N/A	#N/A	#N/A
QSF_contig_017967	2.89896	0.00136135	0.0245693	#N/A	#N/A	#N/A
QSF_LOC100021688.1.1	-3.66543	0.00136308	1	CALM_STIJA Calmodulin	CALM_STIJA	#N/A
QSF_contig_005582	-3.7308	0.00136311	1	#N/A	#N/A	#N/A
QSF_FKBP3.30.116	1.47005	0.00136623	0.0246103	HEBP2_MOUSE Heme-binding protein 2	HEBP2_MOUSE	Hebp2
QSF_GNDS.190.284	3.05333	0.00136658	0.0246103	TCB1_CAEBR Transposable element Tcb1 transposase	TCB1_CAEBR	#N/A
QSF_contig_003879	3.56461	0.00136928	0.0246322	#N/A	#N/A	#N/A
QSF_CXCR3.51.55	3.6488	0.00137501	0.0246981	#N/A	#N/A	#N/A
QSF_M4K4.1.6	-2.32686	0.0013762	0.0246981	M4K4_HUMAN Mitogen-activated protein kinase kinase kinase kinase 4	M4K4_HUMAN	MAP4K4
QSF_LOC100136283.2.6	2.76921	0.00137739	0.0246981	CDC27_MOUSE Cell division cycle protein 27 homolog	CDC27_MOUSE	Cdc27
QSF_LOC100708520.2.4	-4.72568	0.00138384	0.024787	RL5A_XENLA 60S ribosomal protein L5-A	RL5A_XENLA	rpl5-a
QSF_contig_015406	2.04701	0.00139212	0.0248971	UVRB_RICCK UvrABC system protein B {ECO:0000255|HAMAP-Rule:MF_00204}	UVRB_RICCK	uvrB
QSF_GNDS.180.284	3.49953	0.00139298	0.0248971	TC1A_CAEEL Transposable element Tc1 transposase	TC1A_CAEEL	tc1a
QSF_contig_029547	3.88091	0.00139493	0.024898	#N/A	#N/A	#N/A
QSF_contig_019400	3.49654	0.00139602	0.024898	PAPOB_MOUSE Poly(A) polymerase beta	PAPOB_MOUSE	Papolb
QSF_CLCC1.79.218	3.97263	0.00140028	0.0249248	ATG12_PICGU Ubiquitin-like protein ATG12	ATG12_PICGU	ATG12
QSF_contig_053417	2.75422	0.0014018	0.0249248	SPP11_CAEEL Saposin-like protein 11	SPP11_CAEEL	spp-11
QSF_MYO9A.3.9	-6.81596	0.00140202	0.0249248	MYO9A_RAT Unconventional myosin-IXa	MYO9A_RAT	Myo9a
QSF_contig_020070	2.41939	0.00140459	0.0249439	FRS1_ARATH Protein FAR1-RELATED SEQUENCE 1	FRS1_ARATH	FRS1
QSF_LOC101475116.5.13	-5.051	0.00140955	0.0249869	SYI_PHOLL Isoleucine--tRNA ligase {ECO:0000255|HAMAP-Rule:MF_02002}	SYI_PHOLL	ileS
QSF_VA0E2.7.12	1.72325	0.00141081	0.0249869	#N/A	#N/A	#N/A
QSF_LYPA2.4.4	-3.06597	0.00141152	0.0249869	LYPA2_RAT Acyl-protein thioesterase 2	LYPA2_RAT	Lypla2
QSF_contig_050866	3.97458	0.00141355	0.0249962	LORF2_HUMAN LINE-1 retrotransposable element ORF2 protein	LORF2_HUMAN	#N/A
QSF_PG54.1.2	1.81289	0.00141561	0.0250062	SRRM1_CHICK Serine/arginine repetitive matrix protein 1	SRRM1_CHICK	SRRM1
QSF_LOC100701289.1.1	3.12744	0.00143531	0.0253273	NDL1B_DANRE Nuclear distribution protein nudE-like 1-B	NDL1B_DANRE	ndel1b
QSF_NBP1A.23.27	3.65505	0.00144115	0.0254032	#N/A	#N/A	#N/A
QSF_RTJK.12.35	1.50797	0.0014435	0.0254178	RTJK_DROFU RNA-directed DNA polymerase from mobile element jockey	RTJK_DROFU	jockey\pol
QSF_LOC101484822.2.2	4.21481	0.00144603	0.0254355	GDT1_DICDI Probable inactive serine/threonine-protein kinase gdt1	GDT1_DICDI	gdt1
QSF_LOC100703891.1.1	2.40529	0.0014487	0.0254373	LUKL2_STAAB Uncharacterized leukocidin-like protein 2	LUKL2_STAAB	SAB1876c
QSF_RAB8A.23.50	3.61969	0.00144919	0.0254373	#N/A	#N/A	#N/A
QSF_PP2AA.3.445	3.74408	0.00145514	0.0255148	TC1A_CAEEL Transposable element Tc1 transposase	TC1A_CAEEL	tc1a
QSF_CG057.7.247	3.56941	0.00145849	0.0255466	NRPC2_ARATH DNA-directed RNA polymerase III subunit 2 {ECO:0000305}	NRPC2_ARATH	NRPC2
QSF_GP158.3.3	3.75748	0.00146027	0.02555	GP158_RAT Probable G-protein coupled receptor 158	GP158_RAT	Gpr158
QSF_PLCB3.73.169	2.26398	0.00146176	0.02555	#N/A	#N/A	#N/A
QSF_LOC101066508.1.3	5.07641	0.00146395	0.0255616	MINK1_HUMAN Misshapen-like kinase 1	MINK1_HUMAN	MINK1
QSF_CLCC1.134.218	3.22552	0.00147047	0.02562	TCB2_CAEBR Transposable element Tcb2 transposase	TCB2_CAEBR	#N/A
QSF_LOC101075514.1.1	-2.05157	0.00147055	0.02562	RHG17_RAT Rho GTPase-activating protein 17	RHG17_RAT	Arhgap17
QSF_UB2R2.35.42	2.20366	0.00147192	0.02562	MNMG_LACGA tRNA uridine 5-carboxymethylaminomethyl modification enzyme MnmG {ECO:0000255|HAMAP-Rule:MF_00129}	MNMG_LACGA	mnmG
QSF_LOC100711793.2.3	-6.41723	0.00147347	1	PERQ2_DANRE PERQ amino acid-rich with GYF domain-containing protein 2	PERQ2_DANRE	#N/A
QSF_GNDS.212.284	2.83237	0.00147782	0.0256958	TCB2_CAEBR Transposable element Tcb2 transposase	TCB2_CAEBR	#N/A
QSF_LOC100709421.1.2	-2.26049	0.00148072	0.0257193	EF1G_DANRE Elongation factor 1-gamma	EF1G_DANRE	eef1g
QSF_GNDS.44.284	3.04774	0.00148383	0.0257465	TC1A_CAEEL Transposable element Tc1 transposase	TC1A_CAEEL	tc1a
QSF_S26A2.17.83	4.01059	0.00148947	0.0258174	MDFIC_XENLA MyoD family inhibitor domain-containing protein	MDFIC_XENLA	mdfic
QSF_CLCC1.76.218	3.77591	0.00149362	0.0258625	DHQS_ARCFU 3-dehydroquinate synthase {ECO:0000255|HAMAP-Rule:MF_01244}	DHQS_ARCFU	aroB'
QSF_BAFB.51.89	1.43279	0.0014968	0.0258671	RTBS_DROME Probable RNA-directed DNA polymerase from transposon BS	RTBS_DROME	RTase
QSF_PP2AA.153.445	3.77337	0.00149699	0.0258671	LRC10_MOUSE Leucine-rich repeat-containing protein 10	LRC10_MOUSE	Lrrc10
QSF_LOC100694214.1.1	4.02548	0.00150718	0.026016	P66A_HUMAN Transcriptional repressor p66-alpha	P66A_HUMAN	GATAD2A
QSF_BAFB.5.89	2.68522	0.00151213	0.0260602	PO22_POPJA Retrovirus-related Pol polyprotein from type-1 retrotransposable element R2	PO22_POPJA	#N/A
QSF_AGR2.2.7	2.43087	0.00151374	0.0260602	AGR2_DANRE Anterior gradient protein 2 homolog	AGR2_DANRE	agr2
QSF_GNDS.119.284	2.9262	0.00151464	0.0260602	TC1A_CAEEL Transposable element Tc1 transposase	TC1A_CAEEL	tc1a
QSF_RS20.9.12	-4.89901	0.001516	0.0260602	RS20_RAT 40S ribosomal protein S20	RS20_RAT	Rps20
QSF_LOC101468370.7.13	4.41814	0.00152579	0.0262013	#N/A	#N/A	#N/A
QSF_LOC100709074.1.1	-6.52311	0.00152885	1	TCPB_MOUSE T-complex protein 1 subunit beta	TCPB_MOUSE	Cct2
QSF_LOC100490699.1.2	4.73427	0.00152901	0.0262295	TRPD_PSESM Anthranilate phosphoribosyltransferase {ECO:0000255|HAMAP-Rule:MF_00211}	TRPD_PSESM	trpD
QSF_LOC101155386.2.3	2.12286	0.00153242	0.0262385	POGK_MOUSE Pogo transposable element with KRAB domain	POGK_MOUSE	Pogk
QSF_contig_044663	2.90711	0.00153268	0.0262385	TAO1_ARATH Disease resistance protein TAO1 {ECO:0000305}	TAO1_ARATH	TAO1
QSF_HTF4.7.26	3.31439	0.00153501	0.0262513	TC1A_CAEEL Transposable element Tc1 transposase	TC1A_CAEEL	tc1a
QSF_ELMO1.13.14	2.90746	0.00153717	0.0262614	#N/A	#N/A	#N/A
QSF_LOC101481680.58.71	1.82206	0.00154789	0.0264173	TC1A_CAEEL Transposable element Tc1 transposase	TC1A_CAEEL	tc1a
QSF_contig_050807	2.51705	0.00155117	0.0264462	#N/A	#N/A	#N/A
QSF_GNDS.250.284	3.86225	0.00155838	0.0265419	TC1A_CAEEL Transposable element Tc1 transposase	TC1A_CAEEL	tc1a
QSF_LOC100136182.252.349	3.59943	0.00156191	0.0265749	T106A_HUMAN Transmembrane protein 106A	T106A_HUMAN	TMEM106A
QSF_CNPY4.150.306	1.92107	0.0015718	0.026639	TCB1_CAEBR Transposable element Tcb1 transposase	TCB1_CAEBR	#N/A
QSF_KCC2B.1.3	3.62378	0.00157227	0.026639	KCC2G_MOUSE Calcium/calmodulin-dependent protein kinase type II subunit gamma	KCC2G_MOUSE	Camk2g
QSF_T2EA.1.2	3.45469	0.00157538	0.026639	#N/A	#N/A	#N/A
QSF_TNC18.3.4	-2.09811	0.0015757	0.026639	TNC18_MOUSE Trinucleotide repeat-containing gene 18 protein	TNC18_MOUSE	Tnrc18
QSF_ARSK.6.7	2.34266	0.00157862	0.026639	#N/A	#N/A	#N/A
QSF_VRK3.623.924	2.01456	0.00157957	0.026639	TCB1_CAEBR Transposable element Tcb1 transposase	TCB1_CAEBR	#N/A
QSF_LOC101074252.1.1	2.98755	0.0015797	0.026639	RGR_HUMAN RPE-retinal G protein-coupled receptor	RGR_HUMAN	RGR
QSF_ENV.16.21	1.84448	0.00158019	0.026639	EFC1_HUMAN Endogenous retrovirus group FC1 Env polyprotein	EFC1_HUMAN	ERVFC1
QSF_LOC100301669.2.3	-3.74791	0.0015824	1	SUCA_HUMAN Succinyl-CoA ligase [ADP/GDP-forming] subunit alpha, mitochondrial	SUCA_HUMAN	SUCLG1
QSF_contig_044881	2.55871	0.00158257	0.026639	YR871_MIMIV Uncharacterized protein R871	YR871_MIMIV	MIMI_R871
QSF_PRP31.1.2	3.01834	0.00158315	0.026639	YH21B_YEAST Uncharacterized protein YHR213W-B	YH21B_YEAST	YHR213W-B
QSF_LOC101464515.2.2	2.75432	0.00158329	0.026639	RHEB_HUMAN GTP-binding protein Rheb	RHEB_HUMAN	RHEB
QSF_UB2R2.1.42	2.24909	0.00158607	0.0266587	UL77_ELHVK Virion-packaging protein UL25 homolog	UL77_ELHVK	#N/A
QSF_SKAP2.2.2	2.78717	0.00158869	0.0266759	SKAP2_DANRE Src kinase-associated phosphoprotein 2	SKAP2_DANRE	skap2
QSF_LOC101175488.1.1	3.34797	0.00159433	0.0267435	CEAM5_MOUSE Carcinoembryonic antigen-related cell adhesion molecule 5	CEAM5_MOUSE	Ceacam5
QSF_VIPR1.145.153	2.8189	0.00159649	0.0267528	RTJK_DROFU RNA-directed DNA polymerase from mobile element jockey	RTJK_DROFU	jockey\pol
QSF_GPI8.1.1	4.47481	0.00159899	0.0267678	GPI8_HUMAN GPI-anchor transamidase	GPI8_HUMAN	PIGK
QSF_CI142.37.55	1.96316	0.00160259	0.0268011	RTBS_DROME Probable RNA-directed DNA polymerase from transposon BS	RTBS_DROME	RTase
QSF_contig_031278	2.49128	0.00160688	0.0268459	IMDH_TRIFO Inosine-5'-monophosphate dehydrogenase {ECO:0000255|HAMAP-Rule:MF_03156}	IMDH_TRIFO	IMPDH
QSF_LOC100709203.1.1	-2.95863	0.00161262	0.0269147	FOS_TAKRU Proto-oncogene c-Fos	FOS_TAKRU	fos
QSF_TM163.44.72	2.1992	0.00162527	0.0270775	#N/A	#N/A	#N/A
QSF_LOC100316864.66.459	2.13542	0.00162651	0.0270775	TCB2_CAEBR Transposable element Tcb2 transposase	TCB2_CAEBR	#N/A
QSF_FA55C.133.197	3.6972	0.00162775	0.0270775	TCB2_CAEBR Transposable element Tcb2 transposase	TCB2_CAEBR	#N/A
QSF_LOC100698983.3.3	1.95603	0.00162888	0.0270775	LOX5_HUMAN Arachidonate 5-lipoxygenase	LOX5_HUMAN	ALOX5
QSF_VRK3.94.924	2.93639	0.00163285	0.0270958	TCB1_CAEBR Transposable element Tcb1 transposase	TCB1_CAEBR	#N/A
QSF_ERGI3.69.87	3.66991	0.00163324	0.0270958	TCB2_CAEBR Transposable element Tcb2 transposase	TCB2_CAEBR	#N/A
QSF_LOC100701626.2.2	-4.07197	0.00163897	0.0271639	RHG39_MOUSE Rho GTPase-activating protein 39	RHG39_MOUSE	Arhgap39
QSF_contig_053760	-0.925289	0.00164127	0.0271749	#N/A	#N/A	#N/A
QSF_CLCC1.54.218	2.86236	0.00164592	0.0272248	TCB2_CAEBR Transposable element Tcb2 transposase	TCB2_CAEBR	#N/A
QSF_SPD2B.44.48	1.90913	0.00164883	0.0272457	BCAP_MOUSE Phosphoinositide 3-kinase adapter protein 1	BCAP_MOUSE	Pik3ap1
QSF_LIPS.58.170	3.69497	0.00165093	0.0272534	SRCH_RABIT Sarcoplasmic reticulum histidine-rich calcium-binding protein	SRCH_RABIT	HRC
QSF_ERAL.38.96	2.60892	0.00165988	0.0273668	#N/A	#N/A	#N/A
QSF_UB2R2.13.42	3.03171	0.00166109	0.0273668	KLP8_SCHPO Kinesin-like protein 8	KLP8_SCHPO	klp8
QSF_TMM34.15.19	3.57785	0.00166438	0.0273934	CHD7_HUMAN Chromodomain-helicase-DNA-binding protein 7	CHD7_HUMAN	CHD7
QSF_contig_041727	2.99833	0.00166599	0.0273934	#N/A	#N/A	#N/A
QSF_ARC1A.4.4	3.04906	0.00166862	0.0274095	#N/A	#N/A	#N/A
QSF_TRBM.1.2	4.15452	0.00167488	0.0274678	TRBM_SAISC Thrombomodulin	TRBM_SAISC	THBD
QSF_contig_035785	2.89475	0.00167547	0.0274678	#N/A	#N/A	#N/A
QSF_PONZR10.1.1	3.509	0.00168381	0.0275524	PL8L1_HUMAN PLAC8-like protein 1	PL8L1_HUMAN	PLAC8L1
QSF_LOC100373346.5.5	3.74048	0.00168394	0.0275524	TC1A_CAEEL Transposable element Tc1 transposase	TC1A_CAEEL	tc1a
QSF_ACTN1.18.28	3.16226	0.00168795	0.0275627	#N/A	#N/A	#N/A
QSF_VRK3.225.924	3.44167	0.00168989	0.0275627	TCB2_CAEBR Transposable element Tcb2 transposase	TCB2_CAEBR	#N/A
QSF_ACSL4.36.57	2.75067	0.00169055	0.0275627	#N/A	#N/A	#N/A
QSF_LOC100699718.7.9	4.18595	0.00169491	0.0275627	ARGDC_IGNH4 Arginine decarboxylase proenzyme {ECO:0000255|HAMAP-Rule:MF_01298}	ARGDC_IGNH4	Igni_0686
QSF_NUCB2.1.1	-2.66086	0.00169657	0.0275627	NUCB2_RAT Nucleobindin-2	NUCB2_RAT	Nucb2
QSF_SNX18.33.68	3.64611	0.00169863	0.0275627	DNLJ_GEODF DNA ligase {ECO:0000255|HAMAP-Rule:MF_01588}	DNLJ_GEODF	ligA
QSF_PLCB3.112.169	2.74867	0.0016996	0.0275627	#N/A	#N/A	#N/A
QSF_LOC100316864.249.459	2.59203	0.0017014	0.0275627	TC1A_CAEEL Transposable element Tc1 transposase	TC1A_CAEEL	tc1a
QSF_CLCC1.123.218	3.63594	0.00170191	0.0275627	TCB2_CAEBR Transposable element Tcb2 transposase	TCB2_CAEBR	#N/A
QSF_SPRE.6.32	3.57688	0.00170293	0.0275627	#N/A	#N/A	#N/A
QSF_PP2AA.138.445	2.10217	0.00170345	0.0275627	TCB2_CAEBR Transposable element Tcb2 transposase	TCB2_CAEBR	#N/A
QSF_KC1E.3.4	3.55053	0.00170445	0.0275627	#N/A	#N/A	#N/A
QSF_contig_026441	3.11922	0.00171876	0.0277672	GT251_HUMAN Procollagen galactosyltransferase 1	GT251_HUMAN	COLGALT1
QSF_LOC101161612.1.1	1.34053	0.00172859	0.0278989	5NTC_CHICK Cytosolic purine 5'-nucleotidase	5NTC_CHICK	NT5C2
QSF_VRK3.154.924	2.01694	0.00173198	0.0279266	TCB1_CAEBR Transposable element Tcb1 transposase	TCB1_CAEBR	#N/A
QSF_B3GT2.3.3	1.62689	0.0017412	0.028048	B3GT2_HUMAN Beta-1,3-galactosyltransferase 2	B3GT2_HUMAN	B3GALT2
QSF_ATP7A.28.29	1.94272	0.00174402	0.0280547	PAT1_ARATH Scarecrow-like transcription factor PAT1	PAT1_ARATH	PAT1
QSF_FTCD.82.147	5.2676	0.00174595	0.0280547	FUK_HUMAN L-fucose kinase	FUK_HUMAN	#N/A
QSF_contig_018215	2.043	0.00174668	0.0280547	#N/A	#N/A	#N/A
QSF_P3C2G.1.2	1.97923	0.00175142	0.0280863	P3C2G_MOUSE Phosphatidylinositol 4-phosphate 3-kinase C2 domain-containing subunit gamma	P3C2G_MOUSE	Pik3c2g
QSF_SI_RP71-1G13.2.1.2	2.37834	0.00175202	0.0280863	GAGJ_DROFU Nucleic-acid-binding protein from mobile element jockey	GAGJ_DROFU	gag
QSF_ABCB9.2.2	4.85691	0.00175818	0.0281579	ABCB9_MOUSE ATP-binding cassette sub-family B member 9	ABCB9_MOUSE	Abcb9
QSF_LOC101481680.21.71	3.05406	0.00176118	0.0281748	TC1A_CAEEL Transposable element Tc1 transposase	TC1A_CAEEL	tc1a
QSF_CRE_13688.1.1	4.29875	0.00176262	0.0281748	YD023_HUMAN Putative uncharacterized protein FLJ45035	YD023_HUMAN	#N/A
QSF_NBP1A.20.27	3.90253	0.00176674	0.0281778	#N/A	#N/A	#N/A
QSF_CLCC1.191.218	4.28771	0.00176874	0.0281778	RS16_BUCAP 30S ribosomal protein S16 {ECO:0000255|HAMAP-Rule:MF_00385}	RS16_BUCAP	rpsP
QSF_AZL.4.5	2.91879	0.00177012	0.0281778	OAZ2_DANRE Ornithine decarboxylase antizyme 2	OAZ2_DANRE	oaz1b
QSF_POL2.21.21	1.63657	0.00177018	0.0281778	LORF2_HUMAN LINE-1 retrotransposable element ORF2 protein	LORF2_HUMAN	#N/A
QSF_VRK3.74.924	1.98582	0.00177275	0.0281778	AUKBA_XENLA Aurora kinase B-A	AUKBA_XENLA	aurkb-a
QSF_LOC101481096.12.61	3.04484	0.00177296	0.0281778	#N/A	#N/A	#N/A
QSF_FTCD.88.147	4.10645	0.00177987	0.0282606	IF2_BORBU Translation initiation factor IF-2	IF2_BORBU	infB
QSF_IF4A2.1.1	-3.42682	0.00179539	0.0284797	IF4A2_RAT Eukaryotic initiation factor 4A-II	IF4A2_RAT	Eif4a2
QSF_LOC100177658.1.1	3.37575	0.00180194	0.0285565	#N/A	#N/A	#N/A
QSF_VRK3.524.924	4.13108	0.00180506	0.028568	ARC_MYCVP Proteasome-associated ATPase {ECO:0000255|HAMAP-Rule:MF_02112}	ARC_MYCVP	mpa
QSF_S2533.12.19	3.67041	0.0018061	0.028568	#N/A	#N/A	#N/A
QSF_CI142.45.55	3.861	0.00180974	0.0285983	GOSR1_YEAST Golgi SNAP receptor complex member 1	GOSR1_YEAST	GOS1
QSF_LOC100136700.2.10	-6.313	0.00181875	1	GBLP_ORENI Guanine nucleotide-binding protein subunit beta-2-like 1	GBLP_ORENI	gnb2l1
QSF_contig_024781	-3.45829	0.0018196	0.0287269	#N/A	#N/A	#N/A
QSF_PEF1.2.3	4.27257	0.00182884	0.0288453	PAXB1_MOUSE PAX3- and PAX7-binding protein 1	PAXB1_MOUSE	Paxbp1
QSF_IMPA1.55.153	3.194	0.00183286	0.028865	TCB1_CAEBR Transposable element Tcb1 transposase	TCB1_CAEBR	#N/A
QSF_LOC101484869.1.3	4.28154	0.00183359	0.028865	#N/A	#N/A	#N/A
QSF_RTJK.5.35	2.06135	0.00183529	0.028865	RTJK_DROFU RNA-directed DNA polymerase from mobile element jockey	RTJK_DROFU	jockey\pol
QSF_LOC100695803.1.1	-5.77493	0.00184601	1	SCAI_HUMAN Protein SCAI	SCAI_HUMAN	SCAI
QSF_LOC100697057.1.1	-1.21349	0.00184972	0.0290447	RN186_MOUSE RING finger protein 186	RN186_MOUSE	Rnf186
QSF_contig_043565	2.92476	0.00185021	0.0290447	#N/A	#N/A	#N/A
QSF_PSGP.39.39	3.43033	0.00185494	0.0290915	PSGP_ONCMY Polysialoglycoprotein	PSGP_ONCMY	#N/A
QSF_TRAD1.21.35	1.91199	0.00185982	0.0291282	#N/A	#N/A	#N/A
QSF_CIRBP.14.24	-6.64658	0.00186078	0.0291282	CIRBP_PONAB Cold-inducible RNA-binding protein	CIRBP_PONAB	CIRBP
QSF_EXOC3L4.1.1	3.5204	0.00187294	0.0292912	EX3L4_HUMAN Exocyst complex component 3-like protein 4	EX3L4_HUMAN	EXOC3L4
QSF_CALM.4.6	-2.9927	0.001878	0.0293426	CALM_EPIAK Calmodulin	CALM_EPIAK	calm
QSF_FUT11.2.2	1.9075	0.0018828	0.02939	FUT11_ORYLA Alpha-(1,3)-fucosyltransferase 11	FUT11_ORYLA	fut11
QSF_APOD.14.25	3.4042	0.00188514	0.0293989	#N/A	#N/A	#N/A
QSF_RAB31.289.298	-2.34005	0.0018944	0.0295157	TC1A_CAEEL Transposable element Tc1 transposase	TC1A_CAEEL	tc1a
QSF_RO52.1.18	3.76502	0.00190188	0.0296045	TRI39_RAT E3 ubiquitin-protein ligase TRIM39	TRI39_RAT	Trim39
QSF_GMFB.4.4	2.70801	0.00191058	0.0297122	#N/A	#N/A	#N/A
QSF_HMGB2.8.11	-4.63771	0.00192009	1	HMGB2_HUMAN High mobility group protein B2	HMGB2_HUMAN	HMGB2
QSF_ALDOA.10.37	2.3126	0.00192867	0.0299655	CX7A2_MOUSE Cytochrome c oxidase subunit 7A2, mitochondrial	CX7A2_MOUSE	Cox7a2
QSF_NFIB.2.2	2.00377	0.00193786	0.0300803	#N/A	#N/A	#N/A
QSF_TANC2.2.3	3.5612	0.00194167	0.0301112	TANC2_HUMAN Protein TANC2	TANC2_HUMAN	TANC2
QSF_SPD2B.9.48	2.03962	0.00194502	0.0301331	#N/A	#N/A	#N/A
QSF_PP2AA.211.445	3.23995	0.00194839	0.0301331	TCB1_CAEBR Transposable element Tcb1 transposase	TCB1_CAEBR	#N/A
QSF_VRK3.139.924	3.75324	0.00194851	0.0301331	TCB1_CAEBR Transposable element Tcb1 transposase	TCB1_CAEBR	#N/A
QSF_LOC101479709.2.3	-4.87865	0.00195197	0.0301373	RL7A_TAKRU 60S ribosomal protein L7a	RL7A_TAKRU	rpl7a
QSF_contig_028778	3.89482	0.00195405	0.0301373	CBSB_SULAC Cytochrome b558/566 subunit B	CBSB_SULAC	cbsB
QSF_TC1A.17.51	3.40457	0.00195421	0.0301373	TC1A_CAEEL Transposable element Tc1 transposase	TC1A_CAEEL	tc1a
QSF_CLCC1.144.218	2.63328	0.00195635	0.0301423	TC1A_CAEEL Transposable element Tc1 transposase	TC1A_CAEEL	tc1a
QSF_CG057.4.247	4.37256	0.00195833	0.030145	LTOR4_DANRE Ragulator complex protein LAMTOR4	LTOR4_DANRE	lamtor4
QSF_contig_031783	3.64975	0.00196532	0.0302245	RTJK_DROME RNA-directed DNA polymerase from mobile element jockey	RTJK_DROME	pol
QSF_VA0E2.3.12	2.11727	0.00197111	0.0302783	SYP_COLP3 Proline--tRNA ligase {ECO:0000255|HAMAP-Rule:MF_01569}	SYP_COLP3	proS
QSF_LOC101465482.4.4	2.26999	0.00197246	0.0302783	SMAG2_HUMAN Protein Smaug homolog 2	SMAG2_HUMAN	SAMD4B
QSF_GNDS.202.284	3.39262	0.00198149	0.0303692	TCB1_CAEBR Transposable element Tcb1 transposase	TCB1_CAEBR	#N/A
QSF_TCB1.8.47	3.51511	0.00198203	0.0303692	TCB1_CAEBR Transposable element Tcb1 transposase	TCB1_CAEBR	#N/A
QSF_CLCC1.36.218	2.68647	0.00198949	0.0304554	ORF73_HHV8P Protein ORF73	ORF73_HHV8P	#N/A
QSF_FAU.5.12	2.92996	0.00199395	0.0304958	HMGT_ONCMY High mobility group-T protein	HMGT_ONCMY	#N/A
QSF_contig_001303	3.27816	0.00199809	0.0305038	ERB1_HUMAN Endogenous retrovirus group PABLB member 1 Env polyprotein	ERB1_HUMAN	ERVPABLB-1
QSF_LOC100136343.6.6	3.69038	0.00199815	0.0305038	#N/A	#N/A	#N/A
QSF_contig_045796	2.72604	0.00200533	0.0305706	#N/A	#N/A	#N/A
QSF_SETD2.2.3	-1.81895	0.0020062	0.0305706	SETD2_MOUSE Histone-lysine N-methyltransferase SETD2	SETD2_MOUSE	Setd2
QSF_contig_040707	3.41318	0.00201192	0.0306298	#N/A	#N/A	#N/A
QSF_EIF4E1A.3.5	3.45189	0.0020188	0.0307064	#N/A	#N/A	#N/A
QSF_MYH9.4.5	-0.944208	0.00202214	0.0307195	MYH9_CHICK Myosin-9	MYH9_CHICK	MYH9
QSF_contig_029632	3.21333	0.00202335	0.0307195	SYP2L_HUMAN Synaptopodin 2-like protein	SYP2L_HUMAN	SYNPO2L
QSF_contig_006554	4.07196	0.00202792	0.0307608	EFCB5_MOUSE EF-hand calcium-binding domain-containing protein 5	EFCB5_MOUSE	Efcab5
QSF_contig_015792	3.02087	0.00204333	0.0309663	RL31B_LACF3 50S ribosomal protein L31 type B {ECO:0000255|HAMAP-Rule:MF_00502}	RL31B_LACF3	rpmE2
QSF_contig_044550	3.83503	0.00204773	0.0310048	FAAH1_MOUSE Fatty-acid amide hydrolase 1	FAAH1_MOUSE	Faah
QSF_VRK3.544.924	2.7989	0.00205112	0.0310279	TCB1_CAEBR Transposable element Tcb1 transposase	TCB1_CAEBR	#N/A
QSF_CLCC1.195.218	4.17603	0.00205349	0.0310355	TRUB_OPITP tRNA pseudouridine synthase B {ECO:0000255|HAMAP-Rule:MF_01080}	TRUB_OPITP	truB
QSF_RNF14.1.2	2.32598	0.00205736	0.0310657	RNF14_HUMAN E3 ubiquitin-protein ligase RNF14	RNF14_HUMAN	RNF14
QSF_GNDS.33.284	2.14738	0.00205977	0.031074	TC1A_CAEEL Transposable element Tc1 transposase	TC1A_CAEEL	tc1a
QSF_LOC100136065.15.21	1.9309	0.00206887	0.0311702	#N/A	#N/A	#N/A
QSF_CNPY4.188.306	-1.32799	0.0020699	0.0311702	TCB1_CAEBR Transposable element Tcb1 transposase	TCB1_CAEBR	#N/A
QSF_FKBP3.52.116	3.32616	0.00207179	0.0311705	TC1A_CAEEL Transposable element Tc1 transposase	TC1A_CAEEL	tc1a
QSF_RTEL1.1.2	-4.2635	0.00207691	0.0311824	RTEL1_DANRE Regulator of telomere elongation helicase 1 {ECO:0000255|HAMAP-Rule:MF_03065}	RTEL1_DANRE	rtel1
QSF_LIPS.28.170	2.53768	0.00207885	0.0311824	#N/A	#N/A	#N/A
QSF_CLCC1.40.218	2.69323	0.00208028	0.0311824	RPIA_LACDB Ribose-5-phosphate isomerase A {ECO:0000255|HAMAP-Rule:MF_00170}	RPIA_LACDB	rpiA
QSF_LOC101481096.34.61	4.58438	0.00208177	0.0311824	MISO1_PINCO Monofunctional isopimaradiene synthase, chloroplastic {ECO:0000303|PubMed:23370714}	MISO1_PINCO	TPS-mISO1
QSF_MTMRA.2.2	1.51095	0.00208195	0.0311824	MTMRA_DANRE Myotubularin-related protein 10	MTMRA_DANRE	mtmr10
QSF_LOC100136342.1.20	2.02562	0.00208433	0.0311868	SODC1_DICDI Superoxide dismutase [Cu-Zn] 1	SODC1_DICDI	sodA
QSF_VRK3.264.924	4.37354	0.00208599	0.0311868	TCB1_CAEBR Transposable element Tcb1 transposase	TCB1_CAEBR	#N/A
QSF_IRF-3.12.26	3.68898	0.00209009	0.03122	ARP8_BOVIN Actin-related protein 8	ARP8_BOVIN	ACTR8
QSF_FTCD.33.147	3.87262	0.00209647	0.0312873	EFTS_CHLCV Elongation factor Ts {ECO:0000255|HAMAP-Rule:MF_00050}	EFTS_CHLCV	tsf
QSF_LOC101476112.2.4	-4.4926	0.00209866	1	IF4A_NEOFI ATP-dependent RNA helicase eIF4A	IF4A_NEOFI	tif1
QSF_SPD2B.18.48	3.77066	0.00210501	0.0313331	TOP1_RICTY DNA topoisomerase 1 {ECO:0000255|HAMAP-Rule:MF_00952}	TOP1_RICTY	topA
QSF_LOC100535171.3.3	1.63783	0.00210559	0.0313331	#N/A	#N/A	#N/A
QSF_UB2R2.33.42	2.03586	0.00210706	0.0313331	YD115_PLAF7 Uncharacterized protein PFD1115c	YD115_PLAF7	PFD1115c
QSF_JMJD1C.3.4	-4.43381	0.00210708	0.0313331	JHD2C_HUMAN Probable JmjC domain-containing histone demethylation protein 2C	JHD2C_HUMAN	JMJD1C
QSF_CG057.149.247	2.91386	0.00211755	0.031438	#N/A	#N/A	#N/A
QSF_ALG13.46.69	2.83804	0.00211791	0.031438	SIGJ_DICDI SrfA-induced gene J protein	SIGJ_DICDI	sigJ
QSF_PAPOA.4.4	3.10837	0.00212017	0.0314435	PAPOA_MOUSE Poly(A) polymerase alpha	PAPOA_MOUSE	Papola
QSF_VIPR1.23.153	2.19838	0.00212873	0.0315195	RTJK_DROME RNA-directed DNA polymerase from mobile element jockey	RTJK_DROME	pol
QSF_contig_003426	1.38086	0.00212908	0.0315195	TNR1_ECOLI Transposon gamma-delta resolvase	TNR1_ECOLI	tnpR
QSF_NPUN_F4534.2.2	3.6011	0.00213576	0.0315902	UKL1_ARATH Uridine kinase-like protein 1, chloroplastic	UKL1_ARATH	UKL1
QSF_XF0626.1.1	3.56821	0.00213965	0.0316198	EXP24_ARATH Expansin-A24	EXP24_ARATH	EXPA24
QSF_TCNA.1.1	4.43064	0.00215099	0.0317591	#N/A	#N/A	#N/A
QSF_GNA13.3.7	3.31866	0.00215395	0.0317745	#N/A	#N/A	#N/A
QSF_LOC100890133.1.2	2.62332	0.0021628	0.0318769	RTBS_DROME Probable RNA-directed DNA polymerase from transposon BS	RTBS_DROME	RTase
QSF_LOC100316864.102.459	3.73194	0.00217103	0.0319698	TCB1_CAEBR Transposable element Tcb1 transposase	TCB1_CAEBR	#N/A
QSF_TMM43.117.138	3.28553	0.00217851	0.0320516	TCB1_CAEBR Transposable element Tcb1 transposase	TCB1_CAEBR	#N/A
QSF_contig_003709	2.59434	0.00218263	0.0320706	#N/A	#N/A	#N/A
QSF_PVRL1.16.35	4.38491	0.00218365	0.0320706	ADDB_LACPL ATP-dependent helicase/deoxyribonuclease subunit B {ECO:0000255|HAMAP-Rule:MF_01453}	ADDB_LACPL	rexB
QSF_CLCC1.41.218	3.6802	0.00219349	0.0321702	TCB2_CAEBR Transposable element Tcb2 transposase	TCB2_CAEBR	#N/A
QSF_contig_016615	2.47499	0.0021943	0.0321702	TEAD3_MOUSE Transcriptional enhancer factor TEF-5	TEAD3_MOUSE	Tead3
QSF_RAB31.183.298	1.79412	0.00219885	0.0321964	TC1A_CAEEL Transposable element Tc1 transposase	TC1A_CAEEL	tc1a
QSF_LOC100190217.1.2	2.27723	0.00219996	0.0321964	ASPH_BOVIN Aspartyl/asparaginyl beta-hydroxylase	ASPH_BOVIN	ASPH
QSF_MYOME.4.5	3.48908	0.00220317	0.0322151	MYOME_HUMAN Myomegalin	MYOME_HUMAN	PDE4DIP
QSF_TMM43.121.138	3.72158	0.00220901	0.032267	TC1A_CAEEL Transposable element Tc1 transposase	TC1A_CAEEL	tc1a
QSF_SPON2.87.112	2.75466	0.00221285	0.032267	TRMD_NITEU tRNA (guanine-N(1)-)-methyltransferase {ECO:0000255|HAMAP-Rule:MF_00605}	TRMD_NITEU	trmD
QSF_APP1.1.3	2.18558	0.00221398	0.032267	SSP5_STRGN Agglutinin receptor	SSP5_STRGN	ssp5
QSF_LOC100210980.1.1	1.7041	0.00221448	0.032267	TC1A_CAEEL Transposable element Tc1 transposase	TC1A_CAEEL	tc1a
QSF_ELL2.8.16	1.70085	0.0022187	0.0322715	TCB1_CAEBR Transposable element Tcb1 transposase	TCB1_CAEBR	#N/A
QSF_GNDS.94.284	2.36492	0.00222016	0.0322715	TCB1_CAEBR Transposable element Tcb1 transposase	TCB1_CAEBR	#N/A
QSF_contig_020331	-2.0618	0.00222061	0.0322715	#N/A	#N/A	#N/A
QSF_ACTB.7.31	-1.26432	0.00223344	0.0324297	ACTC_TAKRU Actin, alpha cardiac	ACTC_TAKRU	#N/A
QSF_F208B.1.2	-6.7232	0.00223845	0.0324595	F208B_MOUSE Protein FAM208B	F208B_MOUSE	#N/A
QSF_CNPY4.47.306	-1.40432	0.00223939	0.0324595	TCB1_CAEBR Transposable element Tcb1 transposase	TCB1_CAEBR	#N/A
QSF_LOC101488070.1.1	3.30985	0.00224484	0.0325101	NEP_MOUSE Neprilysin	NEP_MOUSE	Mme
QSF_VRK3.773.924	3.83431	0.0022469	0.0325117	CX023_HUMAN Uncharacterized protein CXorf23	CX023_HUMAN	#N/A
QSF_LOC100136182.21.349	2.74011	0.00224982	0.0325257	PRKDC_DICDI DNA-dependent protein kinase catalytic subunit	PRKDC_DICDI	dnapkcs
QSF_CLCC1.8.218	3.28561	0.00228365	0.0329622	#N/A	#N/A	#N/A
QSF_KHDC3.5.5	3.29001	0.00228398	0.0329622	KHDC3_RAT KH domain-containing protein 3	KHDC3_RAT	Khdc3
QSF_PNRC2.3.5	1.61462	0.00229116	0.0330371	PNRC2_SALSA Proline-rich nuclear receptor coactivator 2	PNRC2_SALSA	pnrc2
QSF_contig_050228	4.51382	0.00229351	0.0330388	#N/A	#N/A	#N/A
QSF_SERP1.3.4	3.15423	0.00229524	0.0330388	SERP1_RAT Stress-associated endoplasmic reticulum protein 1	SERP1_RAT	Serp1
QSF_RTBS.13.42	2.3155	0.00229992	0.0330489	RTJK_DROFU RNA-directed DNA polymerase from mobile element jockey	RTJK_DROFU	jockey\pol
QSF_CLCC1.155.218	2.92573	0.00230125	0.0330489	TC1A_CAEEL Transposable element Tc1 transposase	TC1A_CAEEL	tc1a
QSF_CLCC1.18.218	3.37335	0.0023019	0.0330489	GPHRB_HUMAN Golgi pH regulator B	GPHRB_HUMAN	GPR89B
QSF_contig_015261	-1.53371	0.00230623	0.0330826	BAZ2B_HUMAN Bromodomain adjacent to zinc finger domain protein 2B	BAZ2B_HUMAN	BAZ2B
QSF_VRK3.56.924	2.85377	0.00231007	0.0331089	TCB1_CAEBR Transposable element Tcb1 transposase	TCB1_CAEBR	#N/A
QSF_contig_001719	3.27399	0.00231495	0.0331504	#N/A	#N/A	#N/A
QSF_LOC100488659.30.66	1.78642	0.00232556	0.0332737	RTJK_DROME RNA-directed DNA polymerase from mobile element jockey	RTJK_DROME	pol
QSF_LOC101470101.50.58	0.926487	0.00233779	0.03342	TC1A_CAEEL Transposable element Tc1 transposase	TC1A_CAEEL	tc1a
QSF_CLCC1.62.218	2.08658	0.00234534	0.0334757	#N/A	#N/A	#N/A
QSF_GBG12.36.53	3.18886	0.00234616	0.0334757	#N/A	#N/A	#N/A
QSF_LOC100707312.4.6	1.44763	0.00234773	0.0334757	RINI_RAT Ribonuclease inhibitor	RINI_RAT	Rnh1
QSF_contig_035876	4.32297	0.00235033	0.0334842	#N/A	#N/A	#N/A
QSF_HAT1.2.2	-2.39282	0.00235479	0.0334916	HAT1_MOUSE Histone acetyltransferase type B catalytic subunit	HAT1_MOUSE	Hat1
QSF_PLRX4.5.5	3.50499	0.00235488	0.0334916	SEC16_DEBHA COPII coat assembly protein SEC16	SEC16_DEBHA	SEC16
QSF_RBM25.4.12	3.62514	0.00236185	1	RBM25_HUMAN RNA-binding protein 25	RBM25_HUMAN	RBM25
QSF_S26A2.56.83	3.10075	0.00236378	0.0335895	RPOC2_MAIZE DNA-directed RNA polymerase subunit beta'' {ECO:0000255|HAMAP-Rule:MF_01324}	RPOC2_MAIZE	rpoC2
QSF_LOC101487451.1.1	2.2818	0.00237321	0.0336818	LRRC4_RAT Leucine-rich repeat-containing protein 4	LRRC4_RAT	Lrrc4
QSF_contig_061127	4.84183	0.00237433	0.0336818	#N/A	#N/A	#N/A
QSF_LOC100700170.1.2	-2.03918	0.00238239	0.0337674	ZC3HD_HUMAN Zinc finger CCCH domain-containing protein 13	ZC3HD_HUMAN	ZC3H13
QSF_H33.19.22	3.75524	0.00239096	0.0338398	H33_HORVU Histone H3.3	H33_HORVU	#N/A
QSF_NKX2.1A.2.5	2.73326	0.00239156	0.0338398	S35B1_MOUSE Solute carrier family 35 member B1	S35B1_MOUSE	Slc35b1
QSF_LOC100331505.1.1	2.60359	0.00239588	0.0338721	SLAF8_HUMAN SLAM family member 8	SLAF8_HUMAN	SLAMF8
QSF_VRK3.754.924	2.5594	0.00239823	0.0338765	TCB1_CAEBR Transposable element Tcb1 transposase	TCB1_CAEBR	#N/A
QSF_LOC101076390.42.60	1.20592	0.00240131	0.0338913	TCB2_CAEBR Transposable element Tcb2 transposase	TCB2_CAEBR	#N/A
QSF_PO11.1.2	2.3396	0.00240603	0.0339292	RTJK_DROFU RNA-directed DNA polymerase from mobile element jockey	RTJK_DROFU	jockey\pol
QSF_NEMVEDRAFT_V1G113513.5.5	4.39594	0.00241111	0.0339719	KHDC3_RAT KH domain-containing protein 3	KHDC3_RAT	Khdc3
QSF_LOC100498623.5.7	3.2723	0.00241373	0.0339752	GATC_DESMR Aspartyl/glutamyl-tRNA(Asn/Gln) amidotransferase subunit C {ECO:0000255|HAMAP-Rule:MF_00122}	GATC_DESMR	gatC
QSF_PLCB3.116.169	3.68106	0.00241542	0.0339752	#N/A	#N/A	#N/A
QSF_VRK3.205.924	3.56074	0.0024192	0.0339934	TC1A_CAEEL Transposable element Tc1 transposase	TC1A_CAEEL	tc1a
QSF_LOC100699003.1.1	2.14746	0.00242277	0.0339934	FA84A_MOUSE Protein FAM84A	FA84A_MOUSE	#N/A
QSF_STXB.23.28	3.36733	0.00242284	0.0339934	STXB_SYNHO Stonustoxin subunit beta	STXB_SYNHO	#N/A
QSF_LOC101063105.1.1	2.89941	0.00242909	0.0340522	AGRF5_MOUSE Adhesion G protein-coupled receptor F5	AGRF5_MOUSE	Adgrf5
QSF_FINTRIM.89.110	2.60093	0.00243465	0.0341015	#N/A	#N/A	#N/A
QSF_RAB31.89.298	3.06369	0.00244898	0.0342734	TC1A_CAEEL Transposable element Tc1 transposase	TC1A_CAEEL	tc1a
QSF_PLCB3.117.169	4.19134	0.00245345	0.0343002	#N/A	#N/A	#N/A
QSF_CG030.32.68	4.79416	0.00245502	0.0343002	Y5411_DICDI putative uncharacterized GPI-anchored protein DDB_G0275411	Y5411_DICDI	DDB_G0275411
QSF_BASI.1.1	-3.31046	0.00246815	1	BASI_CHICK Basigin	BASI_CHICK	BSG
QSF_contig_029805	-1.80041	0.00247228	0.0345096	AMPA_GEOSM Probable cytosol aminopeptidase {ECO:0000255|HAMAP-Rule:MF_00181}	AMPA_GEOSM	pepA
QSF_PGBM.2.3	-5.37386	0.00247271	1	PGBM_HUMAN Basement membrane-specific heparan sulfate proteoglycan core protein	PGBM_HUMAN	HSPG2
QSF_209L2.2.2	-3.04863	0.00247416	0.0345096	CLC4E_RAT C-type lectin domain family 4 member E	CLC4E_RAT	Clec4e
QSF_CG030.38.68	3.68705	0.00248653	0.0346532	SUP1_CAEEL Protein SUP-1 {ECO:0000312|EMBL:CAA21550.1}	SUP1_CAEEL	sup-1
QSF_SPD2B.21.48	3.36502	0.00249044	0.0346786	#N/A	#N/A	#N/A
QSF_TSEP.9.17	3.63942	0.00249434	1	HSD6_ARATH 11-beta-hydroxysteroid dehydrogenase-like 6	HSD6_ARATH	HSD6
QSF_CLCC1.16.218	3.18417	0.00250303	0.0348247	ATG12_PICGU Ubiquitin-like protein ATG12	ATG12_PICGU	ATG12
QSF_LOC100488389.10.16	2.95107	0.00250877	0.0348335	RTJK_DROME RNA-directed DNA polymerase from mobile element jockey	RTJK_DROME	pol
QSF_contig_043106	2.25174	0.00250883	0.0348335	#N/A	#N/A	#N/A
QSF_RAB8A.18.50	4.09368	0.00250994	0.0348335	SYI_CHRVO Isoleucine--tRNA ligase {ECO:0000255|HAMAP-Rule:MF_02002}	SYI_CHRVO	ileS
QSF_contig_003979	3.38829	0.00251964	0.034939	#N/A	#N/A	#N/A
QSF_CPIPJ_CPIJ017666.1.2	4.32704	0.00252389	0.0349452	#N/A	#N/A	#N/A
QSF_ONCMYK-DBB.8.8	2.4871	0.00252429	0.0349452	HB2C_PIG SLA class II histocompatibility antigen, DQ haplotype C beta chain	HB2C_PIG	#N/A
QSF_LOC100696427.1.4	-4.33781	0.00252956	1	RSBNL_HUMAN Round spermatid basic protein 1-like protein	RSBNL_HUMAN	RSBN1L
QSF_SI_DKEY-10O6.2.1.1	3.96125	0.00253252	0.0350046	YQK1_SCHPO UPF0676 protein C1494.01	YQK1_SCHPO	SPCC1494.01
QSF_HERP2.2.9	3.34712	0.00253352	0.0350046	#N/A	#N/A	#N/A
QSF_LOC100534569.12.12	2.00329	0.00253489	0.0350046	RLA0_RANSY 60S acidic ribosomal protein P0	RLA0_RANSY	#N/A
QSF_TMM43.79.138	3.20784	0.00254242	0.0350795	TCB1_CAEBR Transposable element Tcb1 transposase	TCB1_CAEBR	#N/A
QSF_JKAMP.2.2	4.06284	0.00257431	0.0354569	JKAMP_HUMAN JNK1/MAPK8-associated membrane protein	JKAMP_HUMAN	JKAMP
QSF_LOC100705086.1.3	4.37049	0.00257518	0.0354569	RTN1_RAT Reticulon-1	RTN1_RAT	Rtn1
QSF_ABCF1.5.8	4.16062	0.00257674	0.0354569	#N/A	#N/A	#N/A
QSF_TSEP.7.17	2.17111	0.00257829	0.0354569	TRUD_PSEPF tRNA pseudouridine synthase D {ECO:0000255|HAMAP-Rule:MF_01082}	TRUD_PSEPF	truD
QSF_GGNB2.23.101	1.74211	0.00259237	0.035621	#N/A	#N/A	#N/A
QSF_SNX18.24.68	4.03013	0.00263716	0.0362066	#N/A	#N/A	#N/A
QSF_contig_030493	3.0179	0.0026555	0.0364283	#N/A	#N/A	#N/A
QSF_FTCD.92.147	3.35477	0.00266156	0.0364814	MMT1_HORVU Methionine S-methyltransferase	MMT1_HORVU	MMT1
QSF_LOC100488659.24.66	1.71928	0.0026664	0.0365176	PSRP_SHEFN Putative phosphoenolpyruvate synthase regulatory protein {ECO:0000255|HAMAP-Rule:MF_01062}	PSRP_SHEFN	Sfri_2298
QSF_contig_011420	3.99986	0.00269062	0.0368191	LAT1_RAT Large neutral amino acids transporter small subunit 1	LAT1_RAT	Slc7a5
QSF_LOC101481096.4.61	2.46865	0.00269868	0.0368787	TCB2_CAEBR Transposable element Tcb2 transposase	TCB2_CAEBR	#N/A
QSF_PHLA2.2.2	-2.01257	0.00270118	0.0368787	PHLA2_SALSA Pleckstrin homology-like domain family A member 2	PHLA2_SALSA	phlda2
QSF_LOC101464756.1.2	2.25187	0.00270163	0.0368787	ATL44_ARATH RING-H2 finger protein ATL44	ATL44_ARATH	ATL44
QSF_TSEP.13.17	4.04185	0.00270679	0.0369182	PANB_BACSK 3-methyl-2-oxobutanoate hydroxymethyltransferase {ECO:0000255|HAMAP-Rule:MF_00156}	PANB_BACSK	panB
QSF_RL13A.8.11	-5.1134	0.00270789	1	RL13A_RAT 60S ribosomal protein L13a	RL13A_RAT	Rpl13a
QSF_LOC100694834.1.1	2.20879	0.00270896	0.0369182	LAP4B_RAT Lysosomal-associated transmembrane protein 4B	LAP4B_RAT	Laptm4b
QSF_LOC100136182.98.349	3.1701	0.0027296	0.037169	SYH_NEOSM Histidine--tRNA ligase {ECO:0000255|HAMAP-Rule:MF_00127}	SYH_NEOSM	hisS
QSF_LOC100699561.1.1	-3.28229	0.0027353	1	ZDH24_HUMAN Probable palmitoyltransferase ZDHHC24	ZDH24_HUMAN	ZDHHC24
QSF_TIFA.84.87	2.7346	0.00273903	0.037256	#N/A	#N/A	#N/A
QSF_GNDS.28.284	3.15717	0.00274088	0.037256	TC1A_CAEEL Transposable element Tc1 transposase	TC1A_CAEEL	tc1a
QSF_ONCMYK-UBA.7.22	1.7301	0.0027427	0.037256	HLAG_PANTR Patr class I histocompatibility antigen, alpha chain G	HLAG_PANTR	Patr-G
QSF_VRK3.547.924	3.1543	0.00275153	0.0373241	TCB1_CAEBR Transposable element Tcb1 transposase	TCB1_CAEBR	#N/A
QSF_LOC100194703.4.106	1.79359	0.0027522	0.0373241	TCB2_CAEBR Transposable element Tcb2 transposase	TCB2_CAEBR	#N/A
QSF_VIPR1.108.153	2.20115	0.00276458	0.0374483	ATC8_YEAST Probable phospholipid-transporting ATPase DNF3	ATC8_YEAST	DNF3
QSF_TRAD1.12.35	3.93909	0.00276587	0.0374483	S29A1_RAT Equilibrative nucleoside transporter 1	S29A1_RAT	Slc29a1
QSF_PP2AA.400.445	3.51276	0.00278276	0.0376254	TCB1_CAEBR Transposable element Tcb1 transposase	TCB1_CAEBR	#N/A
QSF_IFIT5.19.19	3.72112	0.00278691	0.0376254	TCB1_CAEBR Transposable element Tcb1 transposase	TCB1_CAEBR	#N/A
QSF_DYL1.4.7	-4.40696	0.00278913	1	DYL1_DROME Dynein light chain 1, cytoplasmic	DYL1_DROME	ctp
QSF_LOC100488659.66.66	2.83367	0.00278954	0.0376254	RTJK_DROME RNA-directed DNA polymerase from mobile element jockey	RTJK_DROME	pol
QSF_QSOX1.1.2	-2.41492	0.00279131	0.0376254	QSOX1_CAVPO Sulfhydryl oxidase 1	QSOX1_CAVPO	QSOX1
QSF_MPRD.19.25	4.78105	0.00279252	0.0376254	CNST_MOUSE Consortin	CNST_MOUSE	Cnst
QSF_RL37A.7.19	3.69258	0.00279264	0.0376254	RL37P_RAT Putative 60S ribosomal protein L37a	RL37P_RAT	Rpl37a-ps1
QSF_COQ4.8.8	2.61751	0.00279477	0.0376254	#N/A	#N/A	#N/A
QSF_CLCC1.201.218	4.20693	0.00279741	0.0376304	EPHB6_RAT Ephrin type-B receptor 6	EPHB6_RAT	Ephb6
QSF_CLUS.17.23	3.57332	0.0028005	0.0376416	#N/A	#N/A	#N/A
QSF_LOC100699486.2.2	-2.93738	0.0028056	0.0376798	SRCAP_HUMAN Helicase SRCAP	SRCAP_HUMAN	SRCAP
QSF_GNDS.130.284	1.8535	0.00281625	0.0377699	TC1A_CAEEL Transposable element Tc1 transposase	TC1A_CAEEL	tc1a
QSF_GNDS.182.284	2.88585	0.00281686	0.0377699	TC1A_CAEEL Transposable element Tc1 transposase	TC1A_CAEEL	tc1a
QSF_GNDS.258.284	4.00267	0.00282984	0.0378813	TCB2_CAEBR Transposable element Tcb2 transposase	TCB2_CAEBR	#N/A
QSF_PP25.2.2	3.01639	0.00283056	0.0378813	ARK73_RAT Aflatoxin B1 aldehyde reductase member 3	ARK73_RAT	Akr7a3
QSF_contig_001198	-4.19067	0.00283344	1	UL141_HCMVM Protein UL141	UL141_HCMVM	UL141
QSF_UBC12.2.32	2.88489	0.00283532	0.0378813	#N/A	#N/A	#N/A
QSF_LOC100136909.7.13	3.04072	0.00283722	0.0378813	GCP3_HUMAN Gamma-tubulin complex component 3	GCP3_HUMAN	TUBGCP3
QSF_JAM1.1.1	1.31999	0.00284125	0.0378813	JAM1_MOUSE Junctional adhesion molecule A	JAM1_MOUSE	F11r
QSF_COPIA.1.4	2.40766	0.00284135	0.0378813	COPIA_DROME Copia protein	COPIA_DROME	GIP
QSF_SEPT8.15.153	1.90962	0.0028421	0.0378813	KYNU2_PHANO Kynureninase 2 {ECO:0000255|HAMAP-Rule:MF_03017}	KYNU2_PHANO	BNA5-2
QSF_VIPR1.77.153	2.98768	0.00284338	0.0378813	RTBS_DROME Probable RNA-directed DNA polymerase from transposon BS	RTBS_DROME	RTase
QSF_UBIQP.2.10	3.65633	0.00285134	1	UBIQP_XENLA Polyubiquitin	UBIQP_XENLA	#N/A
QSF_PSMG1.2.10	2.24874	0.00285282	0.0379767	FUMH_MOUSE Fumarate hydratase, mitochondrial	FUMH_MOUSE	Fh
QSF_TMM43.44.138	3.36101	0.00285656	0.0379961	TC1A_CAEEL Transposable element Tc1 transposase	TC1A_CAEEL	tc1a
QSF_RS21.6.17	-4.35761	0.00287144	1	RS21_ICTPU 40S ribosomal protein S21	RS21_ICTPU	rps21
QSF_NKX2.1A.1.5	3.7941	0.00287223	0.0381572	#N/A	#N/A	#N/A
QSF_VRK3.207.924	3.8414	0.00287325	0.0381572	TCB1_CAEBR Transposable element Tcb1 transposase	TCB1_CAEBR	#N/A
QSF_YO84.4.131	2.65887	0.00287842	0.0381707	#N/A	#N/A	#N/A
QSF_SCUB2.3.4	2.11753	0.00287886	0.0381707	SCUB2_DANRE Signal peptide, CUB and EGF-like domain-containing protein 2	SCUB2_DANRE	scube2
QSF_contig_030361	1.73709	0.00288436	0.0381763	C340_ORYLA Cytochrome P450 3A40	C340_ORYLA	cyp3a40
QSF_TM149.15.34	2.96581	0.00288497	0.0381763	TCB2_CAEBR Transposable element Tcb2 transposase	TCB2_CAEBR	#N/A
QSF_RHG21.4.4	2.93637	0.00288617	0.0381763	RHG21_MOUSE Rho GTPase-activating protein 21	RHG21_MOUSE	Arhgap21
QSF_RL27A.8.19	-5.9675	0.00288712	1	RL27A_XENLA 60S ribosomal protein L27a	RL27A_XENLA	rpl27a
QSF_LOC100194642.12.19	2.48991	0.00289046	0.0382028	RTJK_DROFU RNA-directed DNA polymerase from mobile element jockey	RTJK_DROFU	jockey\pol
QSF_LOC101066960.1.1	-2.64153	0.00290574	0.0383483	CPSF6_DANRE Cleavage and polyadenylation specificity factor subunit 6	CPSF6_DANRE	cpsf6
QSF_LOC100704787.2.2	3.33848	0.00290638	0.0383483	ITA6_CHICK Integrin alpha-6	ITA6_CHICK	ITGA6
QSF_VIPR1.3.153	2.24697	0.00290839	0.0383483	#N/A	#N/A	#N/A
QSF_LOC100495691.4.6	3.54426	0.00291077	1	CUL8_YEAST Cullin-8	CUL8_YEAST	RTT101
QSF_VIPR1.91.153	1.55398	0.00291835	0.0384405	TC1A_CAEEL Transposable element Tc1 transposase	TC1A_CAEEL	tc1a
QSF_LOC100493523.3.10	3.51992	0.00292	0.0384405	GVPD_HALMT Protein GvpD	GVPD_HALMT	gvpD
QSF_VRK3.831.924	3.75918	0.00292387	0.038461	DBNL_MOUSE Drebrin-like protein	DBNL_MOUSE	Dbnl
QSF_CXCR3.29.55	3.49276	0.00293517	0.0385791	Y2731_BACSK UPF0173 metal-dependent hydrolase ABC2731 {ECO:0000255|HAMAP-Rule:MF_00457}	Y2731_BACSK	ABC2731
QSF_PTMAA.6.16	-2.54004	0.00293767	0.0385816	PTMAA_DANRE Prothymosin alpha-A	PTMAA_DANRE	ptmaa
QSF_SORBIDRAFT_05G000453.1.2	3.6356	0.00294256	0.0386119	#N/A	#N/A	#N/A
QSF_RPB1.23.26	4.28932	0.00294462	0.0386119	BYE1_YARLI Transcription factor BYE1	BYE1_YARLI	BYE1
QSF_ZGC_56235.11.13	3.22967	0.00295187	0.0386765	CHLN_SYNJA Light-independent protochlorophyllide reductase subunit N {ECO:0000255|HAMAP-Rule:MF_00352}	CHLN_SYNJA	chlN
QSF_LOC100691440.2.2	-2.83867	0.00295709	0.0386983	BM1LA_DANRE Breast cancer metastasis-suppressor 1-like protein-A	BM1LA_DANRE	brms1la
QSF_VRK3.308.924	3.4622	0.00295819	0.0386983	TCB1_CAEBR Transposable element Tcb1 transposase	TCB1_CAEBR	#N/A
QSF_LOC100712013.1.1	-1.59646	0.00296518	0.0387084	SH24B_MOUSE SH2 domain-containing protein 4B	SH24B_MOUSE	Sh2d4b
QSF_contig_054601	3.33634	0.00296636	0.0387084	MYSM1_BRAFL Histone H2A deubiquitinase MYSM1	MYSM1_BRAFL	MYSM1
QSF_KIF3A.8.19	2.82007	0.00297064	0.0387084	RTBS_DROME Probable RNA-directed DNA polymerase from transposon BS	RTBS_DROME	RTase
QSF_FL2D.2.3	-3.37161	0.00297134	0.0387084	FL2D_DANRE Pre-mRNA-splicing regulator WTAP	FL2D_DANRE	wtap
QSF_LOC100316864.321.459	1.91746	0.00297176	0.0387084	TCB1_CAEBR Transposable element Tcb1 transposase	TCB1_CAEBR	#N/A
QSF_RN19A.4.5	3.72881	0.00297292	0.0387084	RN19A_PIG E3 ubiquitin-protein ligase RNF19A	RN19A_PIG	RNF19A
QSF_CPIPJ_CPIJ006504.1.1	-2.73981	0.0029779	0.0387181	#N/A	#N/A	#N/A
QSF_VRK3.230.924	1.69077	0.00297832	0.0387181	COXX_ROSCS Protoheme IX farnesyltransferase	COXX_ROSCS	ctaB
QSF_FLT3.2.3	-5.36573	0.00297949	1	CSF1R_HUMAN Macrophage colony-stimulating factor 1 receptor	CSF1R_HUMAN	CSF1R
QSF_WDFY4.1.2	2.58465	0.00298609	0.0387889	ACOX1_PHACI Peroxisomal acyl-coenzyme A oxidase 1	ACOX1_PHACI	ACOX1
QSF_ANK3.8.10	1.81578	0.00299124	0.0388255	ANK3_MOUSE Ankyrin-3	ANK3_MOUSE	Ank3
QSF_FADSD6.6.8	3.69044	0.00300239	0.0389398	#N/A	#N/A	#N/A
QSF_TY3H.2.2	4.68688	0.00300941	0.0390005	TY3H_MOUSE Tyrosine 3-monooxygenase	TY3H_MOUSE	Th
QSF_TPRGL.1.3	3.73526	0.00301411	0.039031	TPRGL_HUMAN Tumor protein p63-regulated gene 1-like protein	TPRGL_HUMAN	TPRG1L
QSF_U2AF2.1.2	3.47646	0.00302121	0.0390626	#N/A	#N/A	#N/A
QSF_contig_044175	3.93311	0.00302187	0.0390626	ADA29_HUMAN Disintegrin and metalloproteinase domain-containing protein 29	ADA29_HUMAN	ADAM29
QSF_SPON2.59.112	3.05221	0.0030236	0.0390626	#N/A	#N/A	#N/A
QSF_HSP70A.21.37	1.72387	0.003036	0.0391924	RH2_ARATH DEAD-box ATP-dependent RNA helicase 2	RH2_ARATH	EIF4A3
QSF_contig_051163	3.94307	0.00304268	0.0392252	EIF3B_CANGA Eukaryotic translation initiation factor 3 subunit B {ECO:0000255|HAMAP-Rule:MF_03001}	EIF3B_CANGA	PRT1
QSF_LOC100136292.12.14	3.69749	0.00304325	0.0392252	TBD2A_BOVIN TBC1 domain family member 2A	TBD2A_BOVIN	TBC1D2
QSF_LOC101162934.1.1	-5.37495	0.00304501	1	ROAA_MOUSE Heterogeneous nuclear ribonucleoprotein A/B	ROAA_MOUSE	Hnrnpab
QSF_IF5A1.3.8	-5.37495	0.00304501	1	IF5A1_RABIT Eukaryotic translation initiation factor 5A-1	IF5A1_RABIT	EIF5A
QSF_CRBL2.64.80	3.43813	0.00304959	0.0392765	YEL1_ASHGO Guanine-nucleotide exchange factor YEL1	YEL1_ASHGO	YEL1
QSF_PTN12.1.9	-1.22371	0.00306445	0.0394373	PTN12_MOUSE Tyrosine-protein phosphatase non-receptor type 12	PTN12_MOUSE	Ptpn12
QSF_KCNH1.1.1	3.39231	0.00306711	0.0394411	KCNH1_RAT Potassium voltage-gated channel subfamily H member 1	KCNH1_RAT	Kcnh1
QSF_DEPD7.1.1	2.07931	0.00308097	0.0395562	DEPD7_DANRE DEP domain-containing protein 7	DEPD7_DANRE	depdc7
QSF_ALDOA.15.37	3.31804	0.00308194	0.0395562	TNR1_ECOLI Transposon gamma-delta resolvase	TNR1_ECOLI	tnpR
QSF_IMPA1.147.153	3.31212	0.00308418	0.0395562	TCB1_CAEBR Transposable element Tcb1 transposase	TCB1_CAEBR	#N/A
QSF_contig_052356	1.76639	0.00308557	0.0395562	#N/A	#N/A	#N/A
QSF_CLCC1.71.218	1.70609	0.00310035	0.039715	TCB2_CAEBR Transposable element Tcb2 transposase	TCB2_CAEBR	#N/A
QSF_LIPS.26.170	1.53852	0.00310438	0.039736	CD47_BOVIN Leukocyte surface antigen CD47	CD47_BOVIN	CD47
QSF_IL8R.3.4	1.2483	0.0031115	0.0397687	RNPA_HELPY Ribonuclease P protein component {ECO:0000255|HAMAP-Rule:MF_00227}	RNPA_HELPY	rnpA
QSF_LOC101463597.1.1	3.74117	0.00311171	0.0397687	RFIP1_MOUSE Rab11 family-interacting protein 1	RFIP1_MOUSE	Rab11fip1
QSF_LOC101079500.4.5	-6.59366	0.00312211	0.039871	RL24_GILMI 60S ribosomal protein L24	RL24_GILMI	rpl24
QSF_HINT2.13.16	3.52788	0.00313355	0.0399671	#N/A	#N/A	#N/A
QSF_GBG12.49.53	3.70801	0.00313719	0.0399671	#N/A	#N/A	#N/A
QSF_LOC100703614.3.3	3.34242	0.00313842	0.0399671	LIN1_NYCCO LINE-1 reverse transcriptase homolog	LIN1_NYCCO	#N/A
QSF_TOX.5.5	4.28622	0.00313924	0.0399671	TOX_MOUSE Thymocyte selection-associated high mobility group box protein TOX	TOX_MOUSE	Tox
QSF_MGST1.1.2	3.10031	0.00316347	0.0402448	MGST1_PIG Microsomal glutathione S-transferase 1	MGST1_PIG	MGST1
QSF_LOC100711853.1.2	4.06102	0.00317044	0.04026	#N/A	#N/A	#N/A
QSF_APBA1.25.35	3.31493	0.00317067	0.04026	RTJK_DROFU RNA-directed DNA polymerase from mobile element jockey	RTJK_DROFU	jockey\pol
QSF_NUTF2.13.44	3.59701	0.00317282	1	TC1A_CAEEL Transposable element Tc1 transposase	TC1A_CAEEL	tc1a
QSF_JUN.1.2	-1.43987	0.00317336	0.04026	JUN_CHICK Transcription factor AP-1	JUN_CHICK	JUN
QSF_CNPY4.107.306	1.58667	0.00317759	0.04026	TCB1_CAEBR Transposable element Tcb1 transposase	TCB1_CAEBR	#N/A
QSF_MDM1.1.2	3.80213	0.00317773	0.04026	MDM1_DANRE Nuclear protein MDM1	MDM1_DANRE	mdm1
QSF_CYTH1A.1.1	2.13667	0.00317979	0.04026	CYH1_HUMAN Cytohesin-1	CYH1_HUMAN	CYTH1
QSF_FA55C.73.197	3.00492	0.0031816	0.04026	SZRD1_DANRE SUZ domain-containing protein 1	SZRD1_DANRE	szrd1
QSF_LOC100493523.9.10	1.74513	0.00319085	0.0403201	RTBS_DROME Probable RNA-directed DNA polymerase from transposon BS	RTBS_DROME	RTase
QSF_GADL1.1.10	3.15228	0.0031912	0.0403201	MTR1L_HUMAN Melatonin-related receptor	MTR1L_HUMAN	GPR50
QSF_MXG.1.1	2.91661	0.00319393	0.040324	MX2_ONCMY Interferon-induced GTP-binding protein Mx2	MX2_ONCMY	mx2
QSF_LOC100136909.4.13	3.54271	0.00320735	1	#N/A	#N/A	#N/A
QSF_UB2R2.36.42	2.60533	0.00321026	0.0404291	#N/A	#N/A	#N/A
QSF_LOC101071380.1.2	4.192	0.00321108	0.0404291	LEG1_HUMAN Galectin-1	LEG1_HUMAN	LGALS1
QSF_LOC101480609.1.3	3.66321	0.0032117	0.0404291	HIPK3_MOUSE Homeodomain-interacting protein kinase 3	HIPK3_MOUSE	Hipk3
QSF_LOC100201525.1.1	2.79422	0.00321309	0.0404291	QRIC2_HUMAN Glutamine-rich protein 2	QRIC2_HUMAN	QRICH2
QSF_contig_003320	-2.45968	0.00321448	0.0404291	#N/A	#N/A	#N/A
QSF_TRAD1.19.35	1.87987	0.00321683	0.0404291	ADDA_STRU0 ATP-dependent helicase/nuclease subunit A {ECO:0000255|HAMAP-Rule:MF_01451}	ADDA_STRU0	addA
QSF_contig_052480	2.63729	0.0032197	0.0404346	PRTC_DICCH Serralysin C	PRTC_DICCH	prtC
QSF_contig_030724	2.59218	0.00322757	0.040497	PLSB_PHOLL Glycerol-3-phosphate acyltransferase {ECO:0000255|HAMAP-Rule:MF_00393}	PLSB_PHOLL	plsB
QSF_LOC101471229.5.5	5.24126	0.00322954	0.040497	RL12_MOUSE 60S ribosomal protein L12	RL12_MOUSE	Rpl12
QSF_contig_032901	2.22883	0.00323264	0.0405053	TUT4_HUMAN Terminal uridylyltransferase 4	TUT4_HUMAN	TUT4
QSF_TRAD1.7.35	3.42639	0.00323735	0.0405339	LIN1_NYCCO LINE-1 reverse transcriptase homolog	LIN1_NYCCO	#N/A
QSF_LOC101072042.1.1	-2.2701	0.00324267	0.0405687	HDA1B_XENLA Probable histone deacetylase 1-B	HDA1B_XENLA	hdac1-b
QSF_NP1L1.3.3	2.0608	0.00324501	0.0405687	#N/A	#N/A	#N/A
QSF_LOC100701048.1.1	-2.29196	0.00325388	0.040649	RU17_MOUSE U1 small nuclear ribonucleoprotein 70 kDa	RU17_MOUSE	Snrnp70
QSF_contig_031142	2.04981	0.00327878	0.0408991	#N/A	#N/A	#N/A
QSF_ALAT2.6.7	2.19894	0.00327923	0.0408991	ALAT2_HUMAN Alanine aminotransferase 2	ALAT2_HUMAN	GPT2
QSF_contig_011890	-4.64142	0.00328082	1	#N/A	#N/A	#N/A
QSF_LOC101174762.1.1	3.14652	0.00328127	0.0408991	CASP1_FELCA Caspase-1	CASP1_FELCA	CASP1
QSF_LOC101071539.1.1	-3.59625	0.0032911	1	TF2H2_BOVIN General transcription factor IIH subunit 2	TF2H2_BOVIN	GTF2H2
QSF_C1QT4.8.16	2.37905	0.00329213	0.0410038	#N/A	#N/A	#N/A
QSF_CLCC1.189.218	2.8536	0.00330219	0.0410903	HEM3_DESVM Porphobilinogen deaminase {ECO:0000255|HAMAP-Rule:MF_00260}	HEM3_DESVM	hemC
QSF_COR1C.4.6	1.42163	0.00330438	0.0410903	COR1C_HUMAN Coronin-1C	COR1C_HUMAN	CORO1C
QSF_ARF3.1.2	1.79866	0.00330648	0.0410903	ARF3_TAKRU ADP-ribosylation factor 3	ARF3_TAKRU	arf3
QSF_FA55C.142.197	2.71832	0.00330968	0.0410993	F222A_MOUSE Protein FAM222A	F222A_MOUSE	Fam222a
QSF_contig_005938	2.40559	0.0033203	0.0412005	AFLL_ASPPA Versicolorin B desaturase	AFLL_ASPPA	#N/A
QSF_GNDS.42.284	3.01889	0.00332932	0.0412794	TCB1_CAEBR Transposable element Tcb1 transposase	TCB1_CAEBR	#N/A
QSF_LOC101474792.1.1	4.16706	0.00333163	0.0412794	Y5045_PSEPG UPF0301 protein PputGB1_5045 {ECO:0000255|HAMAP-Rule:MF_00758}	Y5045_PSEPG	PputGB1_5045
QSF_TMM43.83.138	2.34524	0.00333559	0.0412978	TC1A_CAEEL Transposable element Tc1 transposase	TC1A_CAEEL	tc1a
QSF_ACE.2.2	-3.91106	0.00333994	1	ACE_CHICK Angiotensin-converting enzyme	ACE_CHICK	ACE
QSF_FTCD.128.147	1.97138	0.00334785	0.0414188	TCB1_CAEBR Transposable element Tcb1 transposase	TCB1_CAEBR	#N/A
QSF_contig_020414	3.52275	0.00335383	0.0414619	#N/A	#N/A	#N/A
QSF_CDKAL.4.5	2.28434	0.0033655	0.0415753	WDR20_CAEEL WD repeat-containing protein 20 homolog {ECO:0000250|UniProtKB:Q8TBZ3}	WDR20_CAEEL	wdr-20
QSF_VRK3.335.924	2.08867	0.00337324	0.04164	TCB1_CAEBR Transposable element Tcb1 transposase	TCB1_CAEBR	#N/A
QSF_RL36A.8.13	-5.78262	0.00337405	1	RL36A_TAKRU 60S ribosomal protein L36a	RL36A_TAKRU	rpl36a
QSF_contig_009515	3.20825	0.00337791	0.0416668	CC014_BOVIN Uncharacterized protein C3orf14 homolog	CC014_BOVIN	#N/A
QSF_VRK3.377.924	2.24613	0.00338358	0.0417058	TCB2_CAEBR Transposable element Tcb2 transposase	TCB2_CAEBR	#N/A
QSF_PKHA5.4.4	3.06786	0.00339427	0.0418065	PKHA5_HUMAN Pleckstrin homology domain-containing family A member 5	PKHA5_HUMAN	PLEKHA5
QSF_ACOT8.4.5	3.89052	0.00340159	0.0418657	#N/A	#N/A	#N/A
QSF_LOC100752930.1.2	-5.88919	0.00341304	1	SYI_SULDN Isoleucine--tRNA ligase {ECO:0000255|HAMAP-Rule:MF_02002}	SYI_SULDN	ileS
QSF_PP2AA.333.445	3.25932	0.0034272	0.0421497	TC1A_CAEEL Transposable element Tc1 transposase	TC1A_CAEEL	tc1a
QSF_DOCK7.4.6	3.88253	0.00343068	0.0421614	DOCK7_HUMAN Dedicator of cytokinesis protein 7	DOCK7_HUMAN	DOCK7
QSF_LOC101240503.8.8	2.83397	0.00343372	0.0421676	TC1A_CAEEL Transposable element Tc1 transposase	TC1A_CAEEL	tc1a
QSF_LOC101237789.1.1	2.67739	0.00343714	0.0421785	ZBED4_MOUSE Zinc finger BED domain-containing protein 4	ZBED4_MOUSE	Zbed4
QSF_VRK3.566.924	3.58457	0.00344086	0.042193	TCB1_CAEBR Transposable element Tcb1 transposase	TCB1_CAEBR	#N/A
QSF_GNDS.218.284	2.15685	0.00344727	0.0422258	TC1A_CAEEL Transposable element Tc1 transposase	TC1A_CAEEL	tc1a
QSF_contig_059948	3.11982	0.00344861	0.0422258	#N/A	#N/A	#N/A
QSF_CAPSL.46.58	2.00069	0.0034548	0.0422705	#N/A	#N/A	#N/A
QSF_CKLF7.2.8	2.45745	0.00346522	0.0423668	CKLF7_HUMAN CKLF-like MARVEL transmembrane domain-containing protein 7	CKLF7_HUMAN	CMTM7
QSF_DFNA5.3.7	-2.4012	0.00346827	0.042373	DFNA5_HUMAN Non-syndromic hearing impairment protein 5	DFNA5_HUMAN	#N/A
QSF_LOC100136182.281.349	3.41584	0.00347199	0.0423873	#N/A	#N/A	#N/A
QSF_VRK3.847.924	3.78337	0.00347963	0.0424446	TCB1_CAEBR Transposable element Tcb1 transposase	TCB1_CAEBR	#N/A
QSF_LOC100136752.7.8	-5.43076	0.00348063	1	CYT_ONCKE Cystatin {ECO:0000303|PubMed:7764512}	CYT_ONCKE	#N/A
QSF_GNDS.6.284	2.22397	0.00348178	0.0424446	TCB1_CAEBR Transposable element Tcb1 transposase	TCB1_CAEBR	#N/A
QSF_CG030.14.68	3.74155	0.00348612	0.0424535	ARRD5_MOUSE Arrestin domain-containing protein 5	ARRD5_MOUSE	Arrdc5
QSF_LOC568500.3.5	3.62821	0.00348874	0.0424535	#N/A	#N/A	#N/A
QSF_BAFB.46.89	1.40718	0.00349017	0.0424535	RTBS_DROME Probable RNA-directed DNA polymerase from transposon BS	RTBS_DROME	RTase
QSF_SVIP.5.8	3.71704	0.00349732	0.0425094	TCB1_CAEBR Transposable element Tcb1 transposase	TCB1_CAEBR	#N/A
QSF_HTF4.20.26	2.6704	0.00350428	0.042563	KATG_ACICJ Catalase-peroxidase {ECO:0000255|HAMAP-Rule:MF_01961}	KATG_ACICJ	katG
QSF_K13.3.12	-3.02173	0.00351295	0.0426371	K1C13_ONCMY Keratin, type I cytoskeletal 13	K1C13_ONCMY	krt13
QSF_RTJK.3.35	1.63248	0.00352906	0.0428015	RTJK_DROFU RNA-directed DNA polymerase from mobile element jockey	RTJK_DROFU	jockey\pol
QSF_LOC101163599.1.1	3.39649	0.00353462	0.0428376	RTJK_DROFU RNA-directed DNA polymerase from mobile element jockey	RTJK_DROFU	jockey\pol
QSF_PP2AA.281.445	3.58624	0.00353517	1	TC1A_CAEEL Transposable element Tc1 transposase	TC1A_CAEEL	tc1a
QSF_CAPSL.49.58	1.49419	0.00355654	0.0430639	KTHY_METS5 Probable thymidylate kinase {ECO:0000255|HAMAP-Rule:MF_00165}	KTHY_METS5	tmk
QSF_LOC100699891.25.27	3.30675	0.00355847	0.0430639	#N/A	#N/A	#N/A
QSF_VRK3.381.924	1.65461	0.00357182	0.0431941	TCB1_CAEBR Transposable element Tcb1 transposase	TCB1_CAEBR	#N/A
QSF_contig_019801	3.79557	0.00357512	0.0432027	SYD_LACRJ Aspartate--tRNA ligase {ECO:0000255|HAMAP-Rule:MF_00044}	SYD_LACRJ	aspS
QSF_NDK3.1.2	2.07806	0.00359048	0.0433149	NDK3_MOUSE Nucleoside diphosphate kinase 3	NDK3_MOUSE	Nme3
QSF_YO84.108.131	3.35181	0.00359196	0.0433149	RTJK_DROME RNA-directed DNA polymerase from mobile element jockey	RTJK_DROME	pol
QSF_SKP1.3.3	2.85724	0.00359222	0.0433149	SKP1_XENLA S-phase kinase-associated protein 1	SKP1_XENLA	skp1
QSF_RAB10.10.11	3.75387	0.00359812	0.043327	Y1932_PASMU Uncharacterized protein PM1932	Y1932_PASMU	#N/A
QSF_contig_060033	-2.197	0.00359877	0.043327	#N/A	#N/A	#N/A
QSF_U88.43.57	3.08939	0.00360103	0.043327	Y258_HAEIN Putative glycosyltransferase HI_0258	Y258_HAEIN	HI_0258
QSF_DUS1.1.1	-2.03066	0.00361425	0.0434546	DUS1_HUMAN Dual specificity protein phosphatase 1	DUS1_HUMAN	DUSP1
QSF_contig_028657	2.40606	0.00363906	0.0437212	TCB2_CAEBR Transposable element Tcb2 transposase	TCB2_CAEBR	#N/A
QSF_TMM27.21.33	3.74928	0.00364824	0.0437923	MNMG_SULMW tRNA uridine 5-carboxymethylaminomethyl modification enzyme MnmG {ECO:0000255|HAMAP-Rule:MF_00129}	MNMG_SULMW	mnmG
QSF_VRK3.434.924	3.70457	0.00365024	0.0437923	TCB1_CAEBR Transposable element Tcb1 transposase	TCB1_CAEBR	#N/A
QSF_TM56B.9.10	1.95796	0.00365336	0.0437982	TM56B_XENLA Transmembrane protein 56-B	TM56B_XENLA	#N/A
QSF_NPDC1.5.14	3.74566	0.00367171	0.0439865	ADEC_ECOL6 Adenine deaminase {ECO:0000255|HAMAP-Rule:MF_01518}	ADEC_ECOL6	ade
QSF_BBX.1.2	3.67215	0.00367901	0.0440422	BBX_HUMAN HMG box transcription factor BBX	BBX_HUMAN	BBX
QSF_MONBRDRAFT_32750.2.2	1.89159	0.00368234	0.0440504	NIPLB_DANRE Nipped-B-like protein B	NIPLB_DANRE	nipblb
QSF_LOC100136342.17.20	2.68989	0.00368648	0.0440683	MIOB_XENLA WD repeat-containing protein mio-B	MIOB_XENLA	mios-b
QSF_VRK3.353.924	2.12504	0.00370156	0.0442168	TCB1_CAEBR Transposable element Tcb1 transposase	TCB1_CAEBR	#N/A
QSF_LOC101484314.1.1	3.51775	0.00371088	0.0442963	IM92_KLEPN Microcin E492 immunity protein	IM92_KLEPN	mceB
QSF_SROS_8811.1.1	2.67049	0.00372114	0.044387	AUG8_ARATH AUGMIN subunit 8 {ECO:0000303|PubMed:22505726}	AUG8_ARATH	44051
QSF_RAB31.51.298	1.9	0.00372415	0.0443911	TC1A_CAEEL Transposable element Tc1 transposase	TC1A_CAEEL	tc1a
QSF_VRK3.726.924	3.15725	0.00373816	0.0445261	UGGG1_RAT UDP-glucose:glycoprotein glucosyltransferase 1	UGGG1_RAT	Uggt1
QSF_RAB8A.14.50	3.29861	0.0037455	0.0445817	QUTR_TALSN Quinate repressor protein	QUTR_TALSN	qutR
QSF_ATAD3.9.11	1.73732	0.00375212	0.0445982	#N/A	#N/A	#N/A
QSF_CLCC1.53.218	3.04534	0.00375399	0.0445982	TCB2_CAEBR Transposable element Tcb2 transposase	TCB2_CAEBR	#N/A
QSF_contig_053551	2.22526	0.00375493	0.0445982	#N/A	#N/A	#N/A
QSF_NALP3.7.13	1.4222	0.00375901	0.0446148	NLRC3_HUMAN Protein NLRC3	NLRC3_HUMAN	NLRC3
QSF_CCD12.1.4	-4.51014	0.0037791	1	CCD12_HUMAN Coiled-coil domain-containing protein 12	CCD12_HUMAN	CCDC12
QSF_LOC100695446.1.1	1.29049	0.00378077	0.0448411	G3ST4_BOVIN Galactose-3-O-sulfotransferase 4	G3ST4_BOVIN	GAL3ST4
QSF_CD9.30.37	4.05303	0.00379125	0.0449334	#N/A	#N/A	#N/A
QSF_SPT6H.2.2	-0.934154	0.00381325	0.0451619	SPT6H_DANRE Transcription elongation factor SPT6	SPT6H_DANRE	supt6h
QSF_DYNC1I1.4.8	3.76826	0.00381959	0.0451684	TCB1_CAEBR Transposable element Tcb1 transposase	TCB1_CAEBR	#N/A
QSF_LOC101485192.4.5	4.36229	0.00382062	0.0451684	#N/A	#N/A	#N/A
QSF_LOC101166189.2.2	3.54667	0.00382194	0.0451684	PFP_PORGN Pyrophosphate--fructose 6-phosphate 1-phosphotransferase {ECO:0000255|HAMAP-Rule:MF_01980}	PFP_PORGN	pfp
QSF_SMCA4.2.3	-2.75498	0.00382727	0.0451993	SMCA4_RAT Transcription activator BRG1	SMCA4_RAT	Smarca4
QSF_H6.5.6	-5.8049	0.00383052	1	H6_ONCMY Non-histone chromosomal protein H6	H6_ONCMY	#N/A
QSF_LOC100135963.6.6	-5.8049	0.00383052	1	NDKA_RAT Nucleoside diphosphate kinase A	NDKA_RAT	Nme1
QSF_CG043.1.1	3.5423	0.0038438	1	CG043_MOUSE Uncharacterized protein C7orf43 homolog	CG043_MOUSE	#N/A
QSF_CAR8.42.61	3.55692	0.00384675	0.0453681	#N/A	#N/A	#N/A
QSF_GBG12.6.53	3.80901	0.00384702	0.0453681	KEFG_YERPY Glutathione-regulated potassium-efflux system ancillary protein KefG {ECO:0000255|HAMAP-Rule:MF_01415}	KEFG_YERPY	kefG
QSF_contig_060884	2.49455	0.00386744	0.0455597	WAR1_CANAL Transcriptional regulator WAR1	WAR1_CANAL	WAR1
QSF_YWHABL.1.2	-1.12673	0.00386874	0.0455597	143BA_DANRE 14-3-3 protein beta/alpha-A	143BA_DANRE	ywhaba
QSF_TKT.4.7	2.29587	0.00387628	0.0456053	TYSY_DROME Thymidylate synthase	TYSY_DROME	Ts
QSF_GBG12.33.53	4.29287	0.00387954	0.0456053	YPR08_YEAST Uncharacterized protein YPR108W-A	YPR08_YEAST	YPR108W-A
QSF_NEMVEDRAFT_V1G112492.1.1	2.24751	0.00388083	0.0456053	SANT_PLAFF S-antigen protein	SANT_PLAFF	#N/A
QSF_SEPT8.144.153	3.87021	0.0039112	0.0459212	#N/A	#N/A	#N/A
QSF_S39AB.3.41	1.77214	0.00391324	0.0459212	S39AB_BOVIN Zinc transporter ZIP11	S39AB_BOVIN	SLC39A11
QSF_LOC100136558.1.6	3.8461	0.00392229	0.045995	STAT1_HUMAN Signal transducer and activator of transcription 1-alpha/beta	STAT1_HUMAN	STAT1
QSF_LOC100316864.132.459	2.12893	0.00392656	0.0460126	TCB1_CAEBR Transposable element Tcb1 transposase	TCB1_CAEBR	#N/A
QSF_LOC101470101.5.58	3.02552	0.00393731	0.046102	TC1A_CAEEL Transposable element Tc1 transposase	TC1A_CAEEL	tc1a
QSF_PDLI2.15.36	3.92694	0.00393972	0.046102	PDLI2_MACFA PDZ and LIM domain protein 2	PDLI2_MACFA	PDLIM2
QSF_LOC570586.1.2	-3.81501	0.0039399	1	MSD4_MOUSE Myb/SANT-like DNA-binding domain-containing protein 4	MSD4_MOUSE	Msantd4
QSF_ACOX1.5.39	1.89894	0.0039433	0.0461114	TCB2_CAEBR Transposable element Tcb2 transposase	TCB2_CAEBR	#N/A
QSF_LOC100705895.1.1	-2.70786	0.00395647	0.046233	YM67_CAEEL Putative serine protease K12H4.7	YM67_CAEEL	K12H4.7
QSF_LOC100316864.181.459	1.92232	0.00396363	0.046284	TCB1_CAEBR Transposable element Tcb1 transposase	TCB1_CAEBR	#N/A
QSF_TMC7.29.32	2.93903	0.00396641	0.0462841	#N/A	#N/A	#N/A
QSF_KMT2CA.1.2	2.89793	0.00397869	0.0463673	KMT2D_HUMAN Histone-lysine N-methyltransferase 2D	KMT2D_HUMAN	KMT2D
QSF_EPAS1.2.3	2.43842	0.00397912	0.0463673	EPAS1_HUMAN Endothelial PAS domain-containing protein 1	EPAS1_HUMAN	EPAS1
QSF_contig_021764	3.23732	0.00398699	0.0464265	MATK_HORSA Maturase K {ECO:0000255|HAMAP-Rule:MF_01390}	MATK_HORSA	matK
QSF_CLCC1.32.218	3.33562	0.00402221	0.0468039	TCB1_CAEBR Transposable element Tcb1 transposase	TCB1_CAEBR	#N/A
QSF_IL16.1.2	-3.82053	0.0040336	0.0469037	IL16_PANTR Pro-interleukin-16	IL16_PANTR	IL16
QSF_PRKCH.1.1	2.76562	0.00403669	0.0469067	KPCL_HUMAN Protein kinase C eta type	KPCL_HUMAN	PRKCH
QSF_HTF4.10.26	2.72787	0.00405439	0.0470575	TC1A_CAEEL Transposable element Tc1 transposase	TC1A_CAEEL	tc1a
QSF_P4R2A.10.39	1.77342	0.00405532	0.0470575	TCB1_CAEBR Transposable element Tcb1 transposase	TCB1_CAEBR	#N/A
QSF_contig_011519	3.80624	0.00406359	0.0471207	LPXK_VEREI Tetraacyldisaccharide 4'-kinase	LPXK_VEREI	lpxK
QSF_CNPY4.235.306	1.69791	0.00406652	0.0471218	TC1A_CAEEL Transposable element Tc1 transposase	TC1A_CAEEL	tc1a
QSF_LOC100699718.3.9	3.14696	0.00407606	0.0471849	TCB1_CAEBR Transposable element Tcb1 transposase	TCB1_CAEBR	#N/A
QSF_BAFB.74.89	2.30566	0.00407838	0.0471849	#N/A	#N/A	#N/A
QSF_LOC101487662.23.35	3.43246	0.00408174	0.0471849	TC1A_CAEEL Transposable element Tc1 transposase	TC1A_CAEEL	tc1a
QSF_RNH2C.12.14	2.58068	0.0040863	0.0471849	#N/A	#N/A	#N/A
QSF_EF1G.10.21	3.80202	0.0040886	0.0471849	#N/A	#N/A	#N/A
QSF_LOC100698500.6.6	3.18911	0.00408898	0.0471849	POL_WDSV Gag-Pol polyprotein	POL_WDSV	gag-pol
QSF_VRK3.415.924	3.69718	0.00409417	0.0472109	TC1A_CAEEL Transposable element Tc1 transposase	TC1A_CAEEL	tc1a
QSF_LOC100333875.2.3	3.64179	0.00409746	1	#N/A	#N/A	#N/A
QSF_contig_019989	3.92604	0.00409858	0.0472109	#N/A	#N/A	#N/A
QSF_TIFA.69.87	3.06026	0.00409974	0.0472109	YCF78_STIHE Uncharacterized membrane protein ycf78	YCF78_STIHE	ycf78
QSF_LOC100700746.1.1	1.46586	0.00410397	0.0472268	GIMA7_HUMAN GTPase IMAP family member 7	GIMA7_HUMAN	GIMAP7
QSF_contig_059297	3.36371	0.00411159	0.0472819	#N/A	#N/A	#N/A
QSF_LOC101467404.1.1	3.17324	0.00412219	0.0473454	#N/A	#N/A	#N/A
QSF_contig_044596	1.85796	0.00412511	0.0473454	FOCA_ECOLI Probable formate transporter 1	FOCA_ECOLI	focA
QSF_PTMAA.13.16	-2.60244	0.00412777	0.0473454	PTMAA_DANRE Prothymosin alpha-A	PTMAA_DANRE	ptmaa
QSF_LOC101467183.1.2	-5.49973	0.00412849	0.0473454	EH1L1_MOUSE EH domain-binding protein 1-like protein 1	EH1L1_MOUSE	Ehbp1l1
QSF_SPRE.22.32	2.71401	0.00413196	0.0473525	#N/A	#N/A	#N/A
QSF_ZN391.47.69	-5.87785	0.00413641	1	NIFU3_ARATH NifU-like protein 3, chloroplastic	NIFU3_ARATH	NIFU3
QSF_contig_010206	2.71935	0.00416316	0.0476773	#N/A	#N/A	#N/A
QSF_YR554.1.1	2.54013	0.00417412	0.047746	YR554_MIMIV Uncharacterized protein R554	YR554_MIMIV	MIMI_R554
QSF_PP2AA.115.445	3.42464	0.0041749	0.047746	SIA4B_MOUSE CMP-N-acetylneuraminate-beta-galactosamide-alpha-2,3-sialyltransferase 2	SIA4B_MOUSE	St3gal2
QSF_RAB8A.33.50	4.00572	0.00418662	0.0477908	#N/A	#N/A	#N/A
QSF_P4R2A.18.39	1.6627	0.00418732	0.0477908	TCB1_CAEBR Transposable element Tcb1 transposase	TCB1_CAEBR	#N/A
QSF_VRK3.76.924	2.77978	0.00418744	0.0477908	TCB1_CAEBR Transposable element Tcb1 transposase	TCB1_CAEBR	#N/A
QSF_TM163.8.72	1.88766	0.00419281	0.0477986	RS10_NANEQ 30S ribosomal protein S10 {ECO:0000255|HAMAP-Rule:MF_00508}	RS10_NANEQ	rps10
QSF_GIMA4.12.14	2.54507	0.00419387	0.0477986	GIMA4_HUMAN GTPase IMAP family member 4	GIMA4_HUMAN	GIMAP4
QSF_VIPR1.142.153	1.78157	0.00420418	0.0478675	RTJK_DROFU RNA-directed DNA polymerase from mobile element jockey	RTJK_DROFU	jockey\pol
QSF_RBBP6.7.13	4.18152	0.00420634	0.0478675	RBBP6_HUMAN E3 ubiquitin-protein ligase RBBP6	RBBP6_HUMAN	RBBP6
QSF_TM45B.4.5	2.3968	0.00420984	0.0478675	TM45B_DANRE Transmembrane protein 45B	TM45B_DANRE	tmem45b
QSF_FKBP3.25.116	2.33792	0.00421312	0.0478675	TC1A_CAEEL Transposable element Tc1 transposase	TC1A_CAEEL	tc1a
QSF_TM149.31.34	2.86951	0.0042143	0.0478675	TNAP3_MACFA Tumor necrosis factor alpha-induced protein 3	TNAP3_MACFA	TNFAIP3
QSF_contig_041715	3.63548	0.00422958	0.0480083	MEND_PORGI 2-succinyl-5-enolpyruvyl-6-hydroxy-3-cyclohexene-1-carboxylate synthase {ECO:0000255|HAMAP-Rule:MF_01659}	MEND_PORGI	menD
QSF_LIN1.4.13	2.50638	0.00424559	0.0481241	LIN1_NYCCO LINE-1 reverse transcriptase homolog	LIN1_NYCCO	#N/A
QSF_LOC100700642.1.3	-1.59695	0.00424861	0.0481241	RBM25_HUMAN RNA-binding protein 25	RBM25_HUMAN	RBM25
QSF_PP2AA.348.445	2.52357	0.00424917	0.0481241	TEN2_HUMAN Teneurin-2	TEN2_HUMAN	TENM2
QSF_YO84.54.131	1.82667	0.00425135	0.0481241	RTXE_DROME Probable RNA-directed DNA polymerase from transposon X-element	RTXE_DROME	X-element\ORF2
QSF_LOC100194706.73.87	2.41002	0.00425674	0.0481523	SERC3_PONAB Serine incorporator 3	SERC3_PONAB	SERINC3
QSF_FTZ-F1.2.10	3.11008	0.00426292	0.0481569	#N/A	#N/A	#N/A
QSF_CLCC1.128.218	3.24102	0.00426531	0.0481569	#N/A	#N/A	#N/A
QSF_LOC100076345.1.1	4.54733	0.00426774	0.0481569	R12BA_MOUSE RNA-binding protein 12B-A	R12BA_MOUSE	Rbm12b1
QSF_NEMVEDRAFT_V1G200054.1.1	2.02943	0.00426872	0.0481569	NFH_HUMAN Neurofilament heavy polypeptide	NFH_HUMAN	NEFH
QSF_CSKP.5.5	3.55161	0.00427437	0.048188	CSKP_HUMAN Peripheral plasma membrane protein CASK	CSKP_HUMAN	CASK
QSF_ZGC_77149.1.3	-2.63951	0.00427928	0.0482107	UB2D2_XENLA Ubiquitin-conjugating enzyme E2 D2	UB2D2_XENLA	ube2d2
QSF_GP2.1.5	-3.70422	0.00429042	1	UROM_PONAB Uromodulin	UROM_PONAB	UMOD
QSF_YTHDC1.2.3	2.72222	0.00429586	0.0483436	YTDC1_HUMAN YTH domain-containing protein 1	YTDC1_HUMAN	YTHDC1
QSF_RTBS.38.42	1.96055	0.00429688	0.0483436	RTBS_DROME Probable RNA-directed DNA polymerase from transposon BS	RTBS_DROME	RTase
QSF_CG057.201.247	1.92664	0.00430877	0.0484446	TCB1_CAEBR Transposable element Tcb1 transposase	TCB1_CAEBR	#N/A
QSF_RN19A.5.5	-4.38045	0.00431709	1	RN19A_HUMAN E3 ubiquitin-protein ligase RNF19A	RN19A_HUMAN	RNF19A
QSF_LOC100699072.1.1	1.71498	0.00431801	0.0484969	CIP4_DANRE Cdc42-interacting protein 4 homolog	CIP4_DANRE	trip10
QSF_AMGO1.1.2	4.25833	0.00431926	0.0484969	AMGO1_RAT Amphoterin-induced protein 1	AMGO1_RAT	Amigo1
QSF_contig_019688	3.37771	0.00432878	0.0485707	TRPD_PSESM Anthranilate phosphoribosyltransferase {ECO:0000255|HAMAP-Rule:MF_00211}	TRPD_PSESM	trpD
QSF_P2RX4.70.83	2.85836	0.00433166	0.0485707	#N/A	#N/A	#N/A
QSF_HNRH1.12.21	3.08454	0.00433458	0.0485707	#N/A	#N/A	#N/A
QSF_SYAP1.1.2	-1.74008	0.00435014	0.0487122	SYAP1_HUMAN Synapse-associated protein 1	SYAP1_HUMAN	SYAP1
QSF_contig_064217	3.4338	0.00435658	1	#N/A	#N/A	#N/A
QSF_AQP1.6.9	1.55807	0.00435859	0.0487461	#N/A	#N/A	#N/A
QSF_FUT9.2.6	2.42517	0.00435903	0.0487461	FUT9_CRIGR Alpha-(1,3)-fucosyltransferase 9	FUT9_CRIGR	FUT9
QSF_S39AB.39.41	2.86541	0.00436436	0.0487717	#N/A	#N/A	#N/A
QSF_contig_049502	3.23945	0.00436718	0.0487717	RPPH_ORITI RNA pyrophosphohydrolase {ECO:0000255|HAMAP-Rule:MF_00298}	RPPH_ORITI	rppH
QSF_GNDS.209.284	1.83412	0.00439162	0.0490118	TC1A_CAEEL Transposable element Tc1 transposase	TC1A_CAEEL	tc1a
QSF_CAPSL.56.58	2.2432	0.00440732	0.0491394	#N/A	#N/A	#N/A
QSF_PP2AA.91.445	2.85259	0.00441072	0.0491394	TC1A_CAEEL Transposable element Tc1 transposase	TC1A_CAEEL	tc1a
QSF_contig_059662	2.6918	0.00441192	0.0491394	#N/A	#N/A	#N/A
QSF_LOC101069375.1.2	1.93284	0.00442008	0.0491974	LPAR6_RAT Lysophosphatidic acid receptor 6	LPAR6_RAT	Lpar6
QSF_contig_018391	2.74604	0.00442463	0.0492151	#N/A	#N/A	#N/A
QSF_PPIA1.11.14	3.2251	0.00443154	0.049259	H2AV_XENTR Histone H2A.V	H2AV_XENTR	h2az2
QSF_VRK3.608.924	2.12323	0.00444524	0.0493784	TCB1_CAEBR Transposable element Tcb1 transposase	TCB1_CAEBR	#N/A
QSF_SPD2B.31.48	2.67726	0.00445107	0.049382	DMXL1_HUMAN DmX-like protein 1	DMXL1_HUMAN	DMXL1
QSF_CG057.91.247	4.21079	0.0044515	0.049382	ENGB_PELPB Probable GTP-binding protein EngB {ECO:0000255|HAMAP-Rule:MF_00321}	ENGB_PELPB	engB
QSF_HSP70B.1.1	-2.25297	0.00445824	0.049413	HSP70_ONCTS Heat shock 70 kDa protein	HSP70_ONCTS	hsp70
QSF_LOC100697915.1.2	2.77567	0.00446023	0.049413	ZBED5_HUMAN Zinc finger BED domain-containing protein 5	ZBED5_HUMAN	ZBED5
QSF_GNDS.67.284	3.42971	0.00446878	0.0494428	TCB2_CAEBR Transposable element Tcb2 transposase	TCB2_CAEBR	#N/A
QSF_ACOX1.6.39	3.07906	0.00447243	0.0494428	#N/A	#N/A	#N/A
QSF_SI_DKEY-240H12.4.1.1	-1.49334	0.00447455	0.0494428	DAPK2_MOUSE Death-associated protein kinase 2	DAPK2_MOUSE	Dapk2
QSF_contig_015768	2.56125	0.00447481	0.0494428	#N/A	#N/A	#N/A
QSF_GOSR2.14.15	3.69662	0.00449366	0.0496181	FBK57_ARATH Putative F-box/kelch-repeat protein At3g16880	FBK57_ARATH	At3g16880
QSF_LOC100893945.1.1	2.46038	0.00449915	0.0496458	PHO88_SCHPO Inorganic phosphate transport protein pho88	PHO88_SCHPO	pho88
QSF_LOC100316864.219.459	2.94083	0.0045048	0.0496752	TC1A_CAEEL Transposable element Tc1 transposase	TC1A_CAEEL	tc1a
QSF_LOC101472076.1.1	3.44623	0.00450915	0.0496902	UB2D2_XENLA Ubiquitin-conjugating enzyme E2 D2	UB2D2_XENLA	ube2d2
QSF_LOC100697342.1.1	2.89522	0.0045203	0.0497801	S36A1_HUMAN Proton-coupled amino acid transporter 1	S36A1_HUMAN	SLC36A1
QSF_IRF9.16.19	3.43513	0.00452127	1	ELYS_DROME Protein ELYS homolog	ELYS_DROME	Elys
QSF_CLCC1.152.218	2.72248	0.00453531	0.0499124	HIS2_VESOH Phosphoribosyl-ATP pyrophosphatase {ECO:0000255|HAMAP-Rule:MF_01020}	HIS2_VESOH	hisE

## Sheet: GO_BP
Gene ontology biological processes identified among 2017 and 2018 baseline lake trout data.
Term	Count	Genes
GO:0006412~translation	23	RPL17, RPSA, RPL36A, RPL14, RPL27A, RPL24, RPL38, RPS2, RPS6, RPS5, RPS8, RPS27, RPL32, RPL13A, RPS14, RPL3L, SLC25A1, RPL5, RPL12, RPL7A, RPS20, RPS21, RPS24
GO:0000028~ribosomal small subunit assembly	4	RPSA, RPS27, RPS10, RPS5
GO:0001701~in utero embryonic development	11	TAPT1, APOB, MYO18B, CHD7, TANC2, PTPRR, ETNK2, MYH9, GLI2, RBBP6, YBX1
GO:0098609~cell-cell adhesion	7	F11R, DBNL, VAPA, RPL24, RPL7A, RPS2, TES
GO:0045860~positive regulation of protein kinase activity	5	LAT, SNX9, CCL21, RPLP1, CD4
GO:0000027~ribosomal large subunit assembly	4	RPL3L, RPL5, RPL24, RPL12
GO:0031532~actin cytoskeleton reorganization	5	PARVG, TNIK, MINK1, MYH9, CXADR
GO:0008015~blood circulation	3	CHD7, F5, STAT1
GO:0006351~transcription, DNA-templated	24	HMGB2, IL16, EPAS1, CEBPD, SCAI, RORB, NFYB, NR3C1, TEAD3, NLRP3, STAT1, YBX1, GTF2H2, SRY, MURC, FAM120B, ASCC3, PNRC2, JUN, ACTR8, VPS36, SMARCA4, PEG3
GO:0045087~innate immune response	12	SERINC3, HMGB2, CLEC4E, ATG12, TRIM14, MSRB1, TRIM25, NLRP3, MX2, TRIM11, MATK, B2M
GO:0002181~cytoplasmic translation	4	RPL31, RPLP0, RPL9, RPLP1
GO:0030154~cell differentiation	12	MURC, SRY, PBXIP1, RXFP1, FAM120B, NME1, PRKCH, PRRC2A, PRRC2B, AGR2, MATK
GO:0043547~positive regulation of GTPase activity	9	ARHGAP21, F11R, SNX9, LAMTOR4, PSD, ITGA6, CCL21, GNAS, TBC1D2
GO:0090004~positive regulation of establishment of protein localization to plasma membrane	4	PLS1, ITGA3, AGR2, DLG1
GO:0072659~protein localization to plasma membrane	5	EPB41L3, GPR158, TNIK, GPR179, DLG1
GO:0009142~nucleoside triphosphate biosynthetic process	3	NME3, NME1, SUCLG1
GO:0000226~microtubule cytoskeleton organization	5	NEFH, DOCK7, MAP7D1, MAP7D2, GAPDH
GO:0032088~negative regulation of NF-kappaB transcription factor activity	5	NLRC3, CMKLR1, NLRP12, TNFAIP3, NLRP3
GO:0009887~organ morphogenesis	4	VEGFC, NEK8, PALB2, PHLDA2
GO:0043124~negative regulation of I-kappaB kinase/NF-kappaB signaling	4	NLRC3, NLRP12, TNFAIP3, STAT1
GO:0000461~endonucleolytic cleavage to generate mature 3'-end of SSU-rRNA from (SSU-rRNA, 5.8S rRNA, LSU-rRNA)	2	RPSA, RPS21
GO:0016567~protein ubiquitination	9	SOCS3, RNF128, FBXO2, SKP1, TNFAIP3, KLHL3, KLHL33, BARD1, TRIM11
GO:0070681~glutaminyl-tRNAGln biosynthesis via transamidation	2	GATB, GATC
GO:0007613~memory	4	GIP, TH, ITGA3, ITPR3
GO:0017148~negative regulation of translation	4	EIF4A3, RPL13A, GAPDH, SAMD4B
GO:0090023~positive regulation of neutrophil chemotaxis	3	CCL21, DAPK2, CD74
GO:0009791~post-embryonic development	5	TAPT1, APOB, ETNK2, PRDM1, SERP1
GO:1990266~neutrophil migration	2	UMOD, DAPK2
GO:0007399~nervous system development	5	FOS, APOB, NME1, SMARCA4, DLG1
GO:0031032~actomyosin structure organization	3	EPB41L3, F11R, MYH9
GO:0043484~regulation of RNA splicing	3	ESRP1, SNRNP70, AHNAK

## Sheet: GO_MF
Gene ontology molecular functions identified among 2017 and 2018 baseline lake trout data.
Term	Count	Genes
GO:0003735~structural constituent of ribosome	27	RPL17, RPL36A, RPL14, RPL27A, RPL38, RPS2, RPS27, RPL32, RPL31, RPLP0, RPL9, RPLP1, SLC25A1, RPL5, RPL12, RPS20, RPS21, RPS24, RPSA, RPL24, RPS6, RPS5, RPS8, RPL13A, RPS14, RPL3L, RPS10
GO:0044822~poly(A) RNA binding	47	CAST, HMGB2, RPL14, FKBP3, TCOF1, EIF5, PRRC2A, PRRC2B, CANX, YBX1, GOT2, RPS27, TCERG1, BUD13, RPL32, RPLP0, SRRM1, ZNF106, RPL12, RPL7A, RPS20, AHNAK, TES, HNRNPAB, RPS24, ZC3H13, SSRP1, SUCLG1, LGALS1, YTHDC1, RPL24, TRIM25, RPS6, MYH9, RBBP6, RPS8, NOP14, SYNE1, SRSF4, ASCC3, NME1, TBCA, EIF4A2, JUN, EIF4A1, ANXA11, SUPT6H
GO:0003729~mRNA binding	9	EIF4A3, RPL13A, ESRP1, CPSF6, SNRNP70, RPS2, RPS5, RBM25, SAMD4B
GO:0098641~cadherin binding involved in cell-cell adhesion	7	F11R, DBNL, VAPA, RPL24, RPL7A, RPS2, TES
GO:0008134~transcription factor binding	7	FOS, SRY, HMGB2, MDFIC, JUN, NLRP3, TRIM11
GO:0003779~actin binding	7	LRRC10, DNASE1, MARCKSL1, MSRB1, KLHL3, KLHL33, SYNPO2L
GO:0001948~glycoprotein binding	5	FOXRED2, FBXO2, ITGA3, CD4, B2M
GO:0043120~tumor necrosis factor binding	2	TNFRSF1A, A2M
GO:0050567~glutaminyl-tRNA synthase (glutamine-hydrolyzing) activity	2	GATB, GATC
GO:0005246~calcium channel regulator activity	3	GRM3, STIM1, CACNA2D4
GO:0035255~ionotropic glutamate receptor binding	2	GNAS, DLG1

## Sheet: GO_CC
Gene ontology cellular components identified among 2017 and 2018 baseline lake trout data.
Term	Count	Genes
GO:0022625~cytosolic large ribosomal subunit	15	RPL36A, RPL14, RPL27A, RPL24, RPL38, RPL32, RPL13A, RPL31, RPLP0, RPL9, RPLP1, RPL3L, RPL5, RPL12, RPL7A
GO:0022627~cytosolic small ribosomal subunit	10	RPSA, RPS27, RPS10, RPS20, RPS2, RPS21, RPS6, RPS5, RPS8, RPS24
GO:0016020~membrane	45	CAST, RPL14, SLC39A11, CAMK2G, PRRC2A, CNTRL, GLI2, EHBP1L1, RPS2, SLC7A5, COLGALT1, TUBGCP3, ACE, RPL32, RPLP0, PSTPIP1, ZNF106, RPL12, RPL7A, RPS20, PHLDA2, RPS24, LAPTM4B, RPSA, DHRS13, RPL24, RPS6, RPS5, RPS8, NOP14, VEGFC, EIF4A3, PLEKHA5, F5, ASCC3, TMEM106A, EIF4A1, ANXA11, RPL3L, EEF1G, RHEB, CPSF6, OGFR, RNF40, SMARCA4
GO:0070062~extracellular exosome	77	DPP3, A2M, RPL14, MARCKSL1, PDLIM2, CCT2, RPS2, C1QC, SLC7A5, CANX, YBX1, B2M, GOT2, CD47, APOB, RPLP0, RPLP1, PLS1, SLC25A1, RPL12, AHNAK, DLG1, DBNL, F11R, MINPP1, BSG, STX3, TNIK, SUCLG1, FUT11, MINK1, PRKCH, CYB5A, SKP1, MYH9, NME3, G6PD, MELTF, TBCA, NME1, TMEM106A, EIF4A1, EEF1G, GPA33, TNFAIP3, UGGT1, SNX9, GAL3ST4, MME, PRRC2A, ABI1, UMOD, CD74, GMPPB, ACE, UBE2D2, SYAP1, RPL7A, RPS20, VP…
GO:0005925~focal adhesion	20	BSG, HSPG2, MME, PDLIM2, CASK, DOCK7, ITGA3, RPS2, MYH9, RPS5, RPS8, B2M, CORO1C, ITGA6, RPLP0, RPLP1, RPL12, RPL7A, AHNAK, TES
GO:0005913~cell-cell adherens junction	8	F11R, DBNL, VAPA, RPL24, RPL7A, RPS2, MYH9, TES
GO:0016607~nuclear speck	9	EIF4A3, SRY, ZC3H13, EPAS1, YTHDC1, SNRNP70, GLI2, RBM25
GO:0015629~actin cytoskeleton	9	CORO1C, APOB, TCERG1, ACACA, PDLIM2, MSRB1, AHNAK, KLHL33, SYNPO2L
GO:0005856~cytoskeleton	10	EPB41L3, LRRC10, TNIK, RNF128, LDB3, MSRB1, KLHL3, PNP, SLC30A9, ARHGAP39
GO:0005911~cell-cell junction	8	EPB41L3, LAT, STX3, CD2, CASK, PRKCH, GPA33, CXADR
GO:0030529~intracellular ribonucleoprotein complex	6	RPLP0, CPSF6, GAPDH, YBX1, RPS8, HNRNPAB
GO:0033270~paranode region of axon	3	MAG, EPB41L3, ANK3
GO:0015630~microtubule cytoskeleton	6	F11R, CCNB2, VAPA, MAP7D1, MAP7D2, GAPDH
GO:0009898~cytoplasmic side of plasma membrane	4	G6PD, TH, CD2, DLG1
GO:0031965~nuclear membrane	8	SYNE1, PRICKLE1, TNRC18, SCAI, ALOX5, RAP1GAP2, GAPDH, YBX1
GO:0030956~glutamyl-tRNA(Gln) amidotransferase complex	2	GATB, GATC
GO:0000139~Golgi membrane	10	SERINC3, TNFRSF1A, SLC35C1, DBNL, FUT9, B3GALT2, VAPA, FUT11, RHEB, COPE
GO:0008305~integrin complex	3	ITGA6, ITGA3, MYH9
GO:0016529~sarcoplasmic reticulum	3	TRDN, ITPR3, HRC
GO:0005829~cytosol	32	CAST, PPP3R1, CASK, PAXBP1, KLHL3, FOS, ZNF106, PIK3AP1, VPS36, GAPDH, AHNAK, FH, DBNL, SUCLG1, FBXO2, ACACA, PRKCH, SKP1, MYH9, PTPN12, PLCE1, PLEKHA5, G6PD, PRICKLE1, CALM, NME1, TBCA, TOP3A, RHEB, ALOX5, DUSP7, TP53INP1
GO:0016323~basolateral plasma membrane	6	SLC29A1, CASK, UMOD, ITGA3, CXADR, DLG1
GO:0031982~vesicle	4	CORO1C, VAPA, CASK, ANO5
GO:0097452~GAIT complex	2	RPL13A, GAPDH
GO:0015934~large ribosomal subunit	2	RPL17, RPL27A
GO:0005737~cytoplasm	84	DPP3, IER2, IL16, MARCKSL1, TCOF1, EIF5, BBX, PDLIM2, ARHGAP17, GLI2, CXADR, SKAP2, PNP, SLC7A5, GTF2E1, NLRC3, PBXIP1, MDFIC, ANK3, RPLP0, NT5C2, PLS1, MX2, LRRC4, TNIK, SOCS3, SCAI, PTPRR, MINK1, PRKCH, NLRP3, DAPK2, MSMP, EIF4A3, EPB41L3, MAP4K4, MURC, NME1, HIPK3, EIF4A1, EEF1G, PRDM1, TNFAIP3, RAB11FIP1, NPPA, PEG3, HMGB2, SLC39A11, CYTH1, MME, PRRC2A, NR3C1, CNTRL, SESN1, TRIM11, GMPPB, SRY…
GO:0030018~Z disc	5	MURC, MYO18B, LDB3, HRC, SYNPO2L
